# Supplementary material for: Expression Profiles and Interaction of MicroRNA and Transcripts in Response to Bovine Leukemia Virus Exposure
Source: Front Vet Sci. 2022 Jul 19;9:887560. doi: 10.3389/fvets.2022.887560 (PMC9343836; doi:10.3389/fvets.2022.887560)
Supplement: Supplementary file 1 [file Data_Sheet_1.xlsx]

## Sheet: Table S1
Table S1. Known miRNAs detected in serum and white blood cell
Known miRNA	Serum	White blood cell
blv-miR-B1-3p	1	116833
blv-miR-B1-5p	0	512
blv-miR-B2-3p	5005	26711
blv-miR-B2-5p	6554	41030
blv-miR-B3	440	9583
blv-miR-B4-3p	6993	44135
blv-miR-B4-5p	72	287
blv-miR-B5-3p	0	33
blv-miR-B5-5p	13473	41599
blv-novel-miR1-5p	33	9701
bta-let-7a-3p	126	25108
bta-let-7a-5p	25216	383513
bta-let-7b	56918	278561
bta-let-7c	5795	40425
bta-let-7d-3p	9425	196787
bta-let-7d-5p	4142	140790
bta-let-7e-3p	9	14
bta-let-7e-5p	300	2432
bta-let-7f-3p	112	12922
bta-let-7f-5p	8720	359222
bta-let-7g-3p	1	11
bta-let-7g-5p	10981	368025
bta-let-7i-3p	19	413
bta-let-7i-5p	19471	2351260
bta-miR-1	180	88
bta-miR-100	2373	10020
bta-miR-10020	3	0
bta-miR-101-3p	2313	241022
bta-miR-101-5p	0	75
bta-miR-10162-5p	53	226
bta-miR-10164-3p	35	139
bta-miR-10164-5p	0	38
bta-miR-10166-3p	0	4
bta-miR-10166-5p	1	12
bta-miR-10167-3p	4	36
bta-miR-10170-5p	2	1
bta-miR-10171-3p	0	2
bta-miR-10172-3p	0	58
bta-miR-10172-5p	739	26643
bta-miR-10173-5p	7	1225
bta-miR-10174-3p	38	77
bta-miR-10174-5p	1608	61472
bta-miR-10175-3p	9	88
bta-miR-10175-5p	229	150
bta-miR-10176-5p	13	21
bta-miR-10177-5p	0	1
bta-miR-10178	0	8
bta-miR-10179	2	67
bta-miR-10179-5p	1	0
bta-miR-10180-3p	25	108
bta-miR-10180-5p	3	91
bta-miR-10181-3p	0	7
bta-miR-10181-5p	3	15
bta-miR-10182-5p	0	25
bta-miR-10183-5p	0	1
bta-miR-10184-3p	0	2
bta-miR-10185-5p	0	1
bta-miR-10225a	4320	39967
bta-miR-10225b	807	7931
bta-miR-103-3p	2166	310184
bta-miR-103-5p	0	22
bta-miR-105a	1	0
bta-miR-106a-3p	0	4
bta-miR-106a-5p	31	1495
bta-miR-106b-3p	144	25768
bta-miR-106b-5p	6791	374615
bta-miR-107-3p	1281	16063
bta-miR-107-5p	0	2
bta-miR-10a-3p	21	24
bta-miR-10a-5p	8612	41006
bta-miR-10b-3p	66	4
bta-miR-10b-5p	24805	4025
bta-miR-1185	2	3
bta-miR-1197	0	1
bta-miR-11971	195	279
bta-miR-11972	2	1
bta-miR-11973-3p	117	2358
bta-miR-11973-5p	14	46
bta-miR-11974-3p	0	4
bta-miR-11974-5p	2	100
bta-miR-11975	11	1
bta-miR-11976-2	2	2
bta-miR-11977	25	58
bta-miR-11978-3p	3	82
bta-miR-11978-5p	31	3106
bta-miR-11979-3p	12	23
bta-miR-11979-5p	2	2
bta-miR-11980	1372	13
bta-miR-11981	0	4
bta-miR-11982	103	1339
bta-miR-11983	2	6
bta-miR-11984-3p	29	3112
bta-miR-11984-5p	7	99
bta-miR-11985	1	6
bta-miR-11986	0	2
bta-miR-11986b	9	28
bta-miR-11986c-3p	21	180
bta-miR-11986c-5p	0	6
bta-miR-11987	386	32
bta-miR-11988	67	1
bta-miR-11989	1	203
bta-miR-11991-3p	0	548
bta-miR-11991-5p	16	718
bta-miR-11992-3p	0	101
bta-miR-11992-5p	11	199
bta-miR-11993-3p	1	2
bta-miR-11993-5p	8	8
bta-miR-11994-3p	6	63
bta-miR-11994-5p	2	21
bta-miR-11995-3p	2	13
bta-miR-11995-5p	15	187
bta-miR-11997	60	61
bta-miR-11998-3p	5	1497
bta-miR-11998-5p	0	1
bta-miR-11999-3p	0	1
bta-miR-11999-5p	2	170
bta-miR-1-2	1	0
bta-miR-12000	8	130
bta-miR-12001	0	2
bta-miR-12002b-3p	0	69
bta-miR-12002b-5p	0	7
bta-miR-12003	2	10
bta-miR-12004-3p	18	5
bta-miR-12004-5p	1	0
bta-miR-12006	1	3
bta-miR-12008-3p	0	205
bta-miR-12008-5p	2	4106
bta-miR-12009	0	4
bta-miR-12010-3p	0	13
bta-miR-12010-5p	4	45
bta-miR-12011	0	3
bta-miR-12012	1	0
bta-miR-12013	4	11
bta-miR-12015	1	0
bta-miR-12017-3p	0	2
bta-miR-12017-5p	0	65
bta-miR-12018	0	10
bta-miR-12020-3p	0	1
bta-miR-12020-5p	0	2
bta-miR-12021	0	1
bta-miR-12023-3p	1	0
bta-miR-12023-5p	8	18
bta-miR-12024	0	51
bta-miR-12025	14	31
bta-miR-12027	43	476
bta-miR-12028-3p	22	159
bta-miR-12028-5p	3	0
bta-miR-12030	110	4
bta-miR-12031-3p	1	72
bta-miR-12031-5p	0	3
bta-miR-12032	0	1
bta-miR-12033	4	8
bta-miR-12034	54	4
bta-miR-12036-3p	0	5
bta-miR-12036-5p	3	65
bta-miR-12039	0	20
bta-miR-12042	2	793
bta-miR-12043	0	7
bta-miR-12044-3p	0	7
bta-miR-12044-5p	1	601
bta-miR-12045	0	7
bta-miR-12046	4	1
bta-miR-12050	1	59
bta-miR-12051	8	1
bta-miR-12052-3p	0	1
bta-miR-12052-5p	0	40
bta-miR-12055-3p	0	1
bta-miR-12055-5p	0	6
bta-miR-12057	13	12
bta-miR-12059	1	425
bta-miR-12060-3p	14	45
bta-miR-12060-5p	0	11
bta-miR-12061	2	5
bta-miR-12062	1	0
bta-miR-12064	0	11
bta-miR-122-3p	1	9
bta-miR-1224	66	7
bta-miR-122-5p	280567	3751
bta-miR-1246	9995	576
bta-miR-1247-3p	3	0
bta-miR-1247-5p	7	0
bta-miR-1248-2	4	346
bta-miR-1249-3p	229	4902
bta-miR-1249-5p	1	5
bta-miR-124a	1	40
bta-miR-125a-3p	77	9
bta-miR-125a-5p	2484	15026
bta-miR-125b-3p	21	5975
bta-miR-125b-5p	2078	219560
bta-miR-1260b	38	10898
bta-miR-126-3p	226	7
bta-miR-126-5p	14911	735
bta-miR-1271-3p	10	39
bta-miR-1271-5p	665	38955
bta-miR-127-3p	393	1228
bta-miR-127-5p	6	33
bta-miR-1277	0	11
bta-miR-128-3p	62636	1892745
bta-miR-128-5p	5	70
bta-miR-1291	6	155
bta-miR-129-1-3p	220	383
bta-miR-129-1-5p	0	146
bta-miR-129-3p	0	78
bta-miR-129-5p	79	198
bta-miR-1296	55	1629
bta-miR-1298	0	1
bta-miR-1301	3	128
bta-miR-1306-3p	1362	167381
bta-miR-1306-5p	725	6087
bta-miR-1307-3p	19107	79212
bta-miR-1307-5p	640	388
bta-miR-130a	41	61
bta-miR-130b-3p	200	2365
bta-miR-130b-5p	2468	96280
bta-miR-132-3p	82	1014
bta-miR-132-5p	24	140
bta-miR-133a-3p	848	111
bta-miR-133a-5p	4	1
bta-miR-133b	140	12
bta-miR-133c	1	1
bta-miR-134	2	20
bta-miR-1343	4419	97643
bta-miR-135b	0	16
bta-miR-136-3p	12	14
bta-miR-136-5p	1	1
bta-miR-138-3p	12	113
bta-miR-138-5p	30	148
bta-miR-1388-3p	50	254
bta-miR-1388-5p	398	1612
bta-miR-139-3p	99	444
bta-miR-139-5p	1864	7859
bta-miR-140-3p	17030	408567
bta-miR-140-5p	758	2621
bta-miR-141-3p	7	2
bta-miR-141-5p	171	23
bta-miR-142-3p	8	896
bta-miR-142-5p	10656	3519650
bta-miR-143-3p	9349	3548
bta-miR-1434	0	2
bta-miR-1434-5p	1	0
bta-miR-143-5p	19	4
bta-miR-144-3p	5	0
bta-miR-144-5p	45	53454
bta-miR-145-3p	235	123
bta-miR-145-5p	612	962
bta-miR-1468	4897	56490
bta-miR-146a-3p	0	1
bta-miR-146a-5p	39	873
bta-miR-146b-3p	25	1575
bta-miR-146b-5p	697	25143
bta-miR-147-3p	911	1795
bta-miR-147-5p	26	56
bta-miR-148a-3p	216340	5117041
bta-miR-148a-5p	366	8263
bta-miR-148b-3p	2470	166027
bta-miR-148b-5p	59	8926
bta-miR-149-5p	108	404
bta-miR-150-3p	36	366
bta-miR-150-5p	7224	642503
bta-miR-151-3p	90	15097
bta-miR-151-5p	57720	2127372
bta-miR-152-3p	1003	3071
bta-miR-152-5p	3	29
bta-miR-153	0	80
bta-miR-154b	2	58
bta-miR-154c-3p	87	113
bta-miR-154c-5p	1	0
bta-miR-155-3p	0	6
bta-miR-155-5p	1021	16771
bta-miR-1584-5p	3	63
bta-miR-15a-3p	0	19
bta-miR-15a-5p	97	4424
bta-miR-15b-3p	159	72208
bta-miR-15b-5p	16	9884
bta-miR-16a-3p	0	250
bta-miR-16a-5p	884	68746
bta-miR-16b-3p	2	2616
bta-miR-16b-5p	879	72109
bta-miR-17-3p	2	587
bta-miR-17-5p	743	67554
bta-miR-1777a	2	1
bta-miR-1777b	2	0
bta-miR-1814c	0	15
bta-miR-181a-3p	4	34615
bta-miR-181a-5p	8370	91788
bta-miR-181b-3p	0	65
bta-miR-181b-5p	1052	14144
bta-miR-181c-3p	1	19
bta-miR-181c-5p	8	68
bta-miR-181d	55	503
bta-miR-182	21	155
bta-miR-183	42	10
bta-miR-1839-3p	0	18
bta-miR-1839-5p	692	15858
bta-miR-184	41	6
bta-miR-1842-3p	0	34
bta-miR-1842-5p	235	823
bta-miR-1843-3p	0	3
bta-miR-1843-5p	1	207
bta-miR-185-3p	84	1102
bta-miR-185-5p	3591	838022
bta-miR-186-3p	0	8
bta-miR-186-5p	4309	430617
bta-miR-187-3p	20	388
bta-miR-187-5p	0	5
bta-miR-188	32	49
bta-miR-18a-3p	173	2525
bta-miR-18a-5p	189	50148
bta-miR-18b-3p	11	133
bta-miR-18b-5p	1	40
bta-miR-190a	0	4
bta-miR-190b	2	78
bta-miR-191-3p	2579	12179
bta-miR-191-5p	59890	5386188
bta-miR-191b3p	0	1
bta-miR-191b-5p	13	579
bta-miR-192-3p	2	11
bta-miR-192-5p	78116	168000
bta-miR-193a-3p	17	4
bta-miR-193a-5p	6118	639
bta-miR-193b-3p	109	74
bta-miR-193b-5p	266	490
bta-miR-194-3p	23	123
bta-miR-194-5p	4706	23286
bta-miR-1949	0	39
bta-miR-194b-2	0	2
bta-miR-194b-3p	5	92
bta-miR-194b-5p	0	16
bta-miR-195-3p	140	91
bta-miR-195-5p	6	40
bta-miR-196a	1	1
bta-miR-196a-2	0	3
bta-miR-196b	30	92
bta-miR-197-3p	1993	258929
bta-miR-197-5p	8	42
bta-miR-199a-3p	44	459
bta-miR-199a-5p	1787	139905
bta-miR-199b-3p	1787	177964
bta-miR-199b-5p	86	128328
bta-miR-19a	248	11161
bta-miR-19b-3p	333	22338
bta-miR-19b-5p	1	29
bta-miR-200a-3p	116	7
bta-miR-200a-5p	2657	30
bta-miR-200b-3p	709	86
bta-miR-200b-5p	498	14
bta-miR-200c-3p	714	633
bta-miR-200c-5p	2	0
bta-miR-202	0	11
bta-miR-204-3p	693	31959
bta-miR-2045p	240	127
bta-miR-205	547	126
bta-miR-206	3787	23
bta-miR-208a	0	1
bta-miR-208b	5	2
bta-miR-20a-3p	1	10
bta-miR-20a-5p	697	23715
bta-miR-20b-3p	0	4
bta-miR-20b-5p	42	802
bta-miR-210-3p	95	934
bta-miR-210-5p	3	72
bta-miR-211-3p	61	3770
bta-miR-211-5p	25	11
bta-miR-212-3p	19	423
bta-miR-212-5p	1	26
bta-miR-21-3p	63	98
bta-miR-214	630	39
bta-miR-215-3p	164	52
bta-miR-215-5p	18191	9622
bta-miR-21-5p	71170	862216
bta-miR-216a	1	0
bta-miR-216b	5	11
bta-miR-218-3p	0	1
bta-miR-218-5p	622	1044
bta-miR-219-3p	59	749
bta-miR-219-5p	0	50
bta-miR-219b-3p	3	153
bta-miR-219b-5p	0	8
bta-miR-221-3p	14345	66741
bta-miR-221-5p	153	2169
bta-miR-222-3p	9454	82652
bta-miR-222-5p	3	69
bta-miR-223	15663	207259
bta-miR-22-3p	11	1265
bta-miR-224	984	1596
bta-miR-22-5p	58421	61416
bta-miR-2283p	3	76
bta-miR-2284a	1	105
bta-miR-2284aa-3p	31	1600
bta-miR-2284aa-5p	13	12
bta-miR-2284ab-3p	6	1452
bta-miR-2284ab-5p	437	2066
bta-miR-2284b	6	28
bta-miR-2284c-3p	0	4
bta-miR-2284c-5p	2	99
bta-miR-2284d-3p	1	7
bta-miR-2284d-5p	3	73
bta-miR-2284f	17	86
bta-miR-2284h-3p	0	9
bta-miR-2284h-5p	126	335
bta-miR-2284i	3	2
bta-miR-2284j-3p	62	394
bta-miR-2284j-5p	0	1
bta-miR-2284k	15	195
bta-miR-2284l	0	6
bta-miR-2284m	60	423
bta-miR-2284n-3p	0	34
bta-miR-2284n-5p	0	1
bta-miR-2284o	8	41
bta-miR-2284p-3p	0	83
bta-miR-2284p-5p	0	12
bta-miR-2284q-3p	6	10
bta-miR-2284q-5p	2	0
bta-miR-2284r	5	12
bta-miR-2284u	0	1
bta-miR-2284v	12	2613
bta-miR-2284w-3p	2413	490647
bta-miR-2284w-5p	172	1446
bta-miR-2284x-3p	42	2804
bta-miR-2284x-5p	5831	55200
bta-miR-2284y-4	756	555
bta-miR-2284z-7	48	780
bta-miR-2285a	0	15
bta-miR-2285aa-3p	64	21483
bta-miR-2285aa-5p	2	727
bta-miR-2285ab-3p	5	735
bta-miR-2285ab-5p	0	10
bta-miR-2285ac-3p	1	278
bta-miR-2285ac-5p	0	58
bta-miR-2285ad-3p	6	2021
bta-miR-2285ad-5p	0	157
bta-miR-2285ae	22	1057
bta-miR-2285af	0	8
bta-miR-2285af-2	0	3
bta-miR-2285ah-3p	0	1
bta-miR-2285ah-5p	1	2044
bta-miR-2285ai	2	2
bta-miR-2285ai-3p	1	104
bta-miR-2285ai-5p	10	479
bta-miR-2285aj	55	241
bta-miR-2285aj-5p	43	268
bta-miR-2285ak-3p	0	2
bta-miR-2285ak-5p	35	354
bta-miR-2285al-3p	3	32
bta-miR-2285al-5p	4	892
bta-miR-2285am-3p	0	11
bta-miR-2285am-5p	0	4371
bta-miR-2285an-3p	6	144
bta-miR-2285an-5p	0	11
bta-miR-2285ao	0	1046
bta-miR-2285ao-3	135	321
bta-miR-2285ap	14	1522
bta-miR-2285aq-3p	0	810
bta-miR-2285aq-5p	0	7
bta-miR-2285ar	8	0
bta-miR-2285as-3	0	86
bta-miR-2285at-3p	5	941
bta-miR-2285at-4	10	0
bta-miR-2285at-5p	0	40
bta-miR-2285au-3p	0	465
bta-miR-2285au-5p	135	1474
bta-miR-2285av-3p	3	224
bta-miR-2285av-5p	109	966
bta-miR-2285aw-3p	0	969
bta-miR-2285aw-5p	0	12
bta-miR-2285ax-3	2	107
bta-miR-2285ax-3p	0	54
bta-miR-2285ax-5p	0	1
bta-miR-2285ay	5	583
bta-miR-2285az	2	96
bta-miR-2285b-2	3	0
bta-miR-2285b-3p	30	7309
bta-miR-2285b-5p	16	103
bta-miR-2285ba	2	0
bta-miR-2285ba-2	2	37
bta-miR-2285bb	8	0
bta-miR-2285bc-3p	1781	400018
bta-miR-2285bc-5p	6	2533
bta-miR-2285bd-3p	23	7150
bta-miR-2285bd-5p	0	4
bta-miR-2285be	1	17
bta-miR-2285bf-3	20	42
bta-miR-2285bf-3p	0	406
bta-miR-2285bf-5p	0	1
bta-miR-2285bg-3p	1	329
bta-miR-2285bg-5p	0	7
bta-miR-2285bh	14	97
bta-miR-2285bi-2	2	4
bta-miR-2285bj-2	0	34
bta-miR-2285bk	4	38
bta-miR-2285bl	18	11626
bta-miR-2285bn	41	3721
bta-miR-2285bo-3p	0	29
bta-miR-2285bo-5p	138	1154
bta-miR-2285bp	4	880
bta-miR-2285bq	15	1547
bta-miR-2285br	3	226
bta-miR-2285bs-3p	4	17
bta-miR-2285bs-5p	3	0
bta-miR-2285bt-3p	1	76
bta-miR-2285bt-5p	0	17
bta-miR-2285bu-2	1	205
bta-miR-2285bu-3p	4	609
bta-miR-2285bu-5p	0	2
bta-miR-2285bv-3p	4	231
bta-miR-2285bv-5p	0	16
bta-miR-2285bw-3p	0	5
bta-miR-2285bw-5p	0	96
bta-miR-2285bx	0	84
bta-miR-2285by-3p	24	225
bta-miR-2285by-5p	0	4
bta-miR-2285bz-3p	10	143
bta-miR-2285bz-5p	29	1064
bta-miR-2285c-3p	0	121
bta-miR-2285c-5p	0	411
bta-miR-2285ca	1	36
bta-miR-2285cc	85	22816
bta-miR-2285cd-3p	0	2
bta-miR-2285cd-5p	1	521
bta-miR-2285ce	36	3725
bta-miR-2285cf	14	34
bta-miR-2285cg	0	7
bta-miR-2285ch	0	2
bta-miR-2285ci	0	46
bta-miR-2285cj	33	3528
bta-miR-2285ck-3p	0	71
bta-miR-2285ck-5p	0	111
bta-miR-2285cl	0	3
bta-miR-2285cm	12	826
bta-miR-2285cn-3p	2	161
bta-miR-2285cn-5p	0	3
bta-miR-2285co-3p	4	1528
bta-miR-2285co-5p	0	41
bta-miR-2285cp	2	8
bta-miR-2285cr-2	0	3
bta-miR-2285cs	1	99
bta-miR-2285cu	0	4
bta-miR-2285cv-2	2	29
bta-miR-2285cv-3p	0	5
bta-miR-2285cv-5p	0	1
bta-miR-2285cw-2	0	3
bta-miR-2285cx-3p	0	357
bta-miR-2285cx-5p	0	67
bta-miR-2285cy-3p	29	3235
bta-miR-2285cy-5p	0	1
bta-miR-2285cz	0	159
bta-miR-2285d	1	19
bta-miR-2285da	12	1004
bta-miR-2285dc	0	6
bta-miR-2285dd	13	973
bta-miR-2285de	1	1
bta-miR-2285df-3p	0	2
bta-miR-2285df-5p	0	11
bta-miR-2285dg	0	49
bta-miR-2285dh-3p	5	1376
bta-miR-2285dh-5p	0	1
bta-miR-2285di	1	14
bta-miR-2285dj-3p	0	46
bta-miR-2285dj-5p	0	4
bta-miR-2285dk	0	10
bta-miR-2285dl-2	0	55
bta-miR-2285dl-3p	0	604
bta-miR-2285dm	0	1
bta-miR-2285e-2	5	278
bta-miR-2285e-3p	8	1043
bta-miR-2285e-5p	0	10
bta-miR-2285f-3p	0	81
bta-miR-2285f-5p	0	8204
bta-miR-2285g-3	7	416
bta-miR-2285g-3p	0	1886
bta-miR-2285g-5p	0	11
bta-miR-2285h-3p	2	1587
bta-miR-2285h-5p	0	20
bta-miR-2285i	25	508
bta-miR-2285j-2	14	82
bta-miR-2285j-3p	0	4228
bta-miR-2285j-5p	0	43
bta-miR-2285k-3p	60	5866
bta-miR-2285k-5	114	0
bta-miR-2285k-5p	1	19
bta-miR-2285l	13	1131
bta-miR-2285m	0	8
bta-miR-2285m-5	1	82
bta-miR-2285n-3p	11	431
bta-miR-2285n5p	1	0
bta-miR-2285n-7	10	1055
bta-miR-2285o	10	524
bta-miR-2285o-5	2	0
bta-miR-2285p	35	1594
bta-miR-2285q	53	2056
bta-miR-2285r	0	65
bta-miR-2285s	1	6
bta-miR-2285t-3p	375	4883
bta-miR-2285t-5p	11	167
bta-miR-2285u-3p	42	1066
bta-miR-2285u-5p	0	3
bta-miR-2285v-3p	4	554
bta-miR-2285v-5p	0	1
bta-miR-2285w	0	1
bta-miR-2285x	3	347
bta-miR-2285y	0	94
bta-miR-2285z	91	853
bta-miR-2286	0	1
bta-miR-2289	3	72
bta-miR-2290	0	2
bta-miR-2295	3	9
bta-miR-2299-3p	153	451
bta-miR-2299-5p	149	451
bta-miR-2300a-5p	0	14
bta-miR-2300b-3p	5	5
bta-miR-2300b-5p	0	1
bta-miR-2308-3p	11	63
bta-miR-2308-5p	0	1
bta-miR-2310	0	15
bta-miR-2311-3p	1	0
bta-miR-2311-5p	25	186
bta-miR-2312	0	66
bta-miR-2313-3p	4	33
bta-miR-2313-5p	106	118
bta-miR-2316	51	303
bta-miR-2318	0	28
bta-miR-2319a	0	43
bta-miR-2319b	0	14
bta-miR-2320-3p	2	246
bta-miR-2320-5p	30	293
bta-miR-2323	3	501
bta-miR-2325a	2	0
bta-miR-2327	0	1
bta-miR-2328	0	1
bta-miR-2328-5p	7	2
bta-miR-2329-5p	4	5
bta-miR-2330-3p	0	2
bta-miR-2330-5p	3	8
bta-miR-2331-3p	0	102
bta-miR-2331-5p	4	240
bta-miR-2332	14	1084
bta-miR-2334	2	3
bta-miR-2336	13	1257
bta-miR-2338	2	4
bta-miR-2339	39	1274
bta-miR-2340	23	19
bta-miR-2342-3p	2	29
bta-miR-2342-5p	0	2
bta-miR-2343-3p	0	1
bta-miR-2343-5p	1	5
bta-miR-2344	0	43
bta-miR-2346-3p	1	407
bta-miR-2346-5p	29	512
bta-miR-2347	0	1
bta-miR-2348	1	1
bta-miR-2349	77	193
bta-miR-2350	10	18
bta-miR-2353	2	10
bta-miR-2355	0	2
bta-miR-2355-5p	2	10
bta-miR-2357	0	7
bta-miR-2363	0	4
bta-miR-2364	0	6
bta-miR-2366	8	18
bta-miR-2367-5p	0	1
bta-miR-2368-3p	0	12
bta-miR-2368-5p	70	3016
bta-miR-2370-3p	0	2
bta-miR-2370-5p	0	93
bta-miR-2372	1	0
bta-miR-2373	0	1
bta-miR-2376	313	2415
bta-miR-2377-3p	0	35
bta-miR-2377-5p	1	434
bta-miR-2378	5	9
bta-miR-2380	0	5
bta-miR-2381-3p	0	4
bta-miR-2381-5p	0	21
bta-miR-2382-3p	2	96
bta-miR-2382-5p	20	420
bta-miR-2385-3p	0	2
bta-miR-2385-5p	0	9
bta-miR-2387-3p	0	1
bta-miR-2387-5p	87	297
bta-miR-2388-3p	1	24
bta-miR-2388-5p	24	5243
bta-miR-2389	1	12
bta-miR-2392	1	27
bta-miR-2394	0	62
bta-miR-2396	1	0
bta-miR-2397-3p	0	557
bta-miR-2397-5p	5	660
bta-miR-2398-3p	0	3
bta-miR-2398-5p	72	806
bta-miR-2399-3p	2	5
bta-miR-2399-5p	18	71
bta-miR-23a-3p	9918	43949
bta-miR-23a-5p	141	10
bta-miR-23b	1468	0
bta-miR-2400-3p	1	282
bta-miR-2400-5p	12	434
bta-miR-2401	0	1
bta-miR-2402	1	12
bta-miR-2403-3p	0	4
bta-miR-2403-5p	57	443
bta-miR-2404-2	0	1172
bta-miR-2406	0	30
bta-miR-2407	0	1
bta-miR-2408-3p	52	2115
bta-miR-2408-5p	0	1
bta-miR-2409-3p	30	950
bta-miR-2409-5p	0	1
bta-miR-2410	4	91
bta-miR-2411-3p	5	13
bta-miR-2411-5p	18	57
bta-miR-2413	0	1
bta-miR-24-1-3p	62504	119453
bta-miR-2415-3p	0	3
bta-miR-2415-5p	73	6049
bta-miR-24-1-5p	58	503
bta-miR-2416	19	160
bta-miR-2417	0	157
bta-miR-2419-3p	31	170
bta-miR-2419-5p	551	18346
bta-miR-2422	11	0
bta-miR-2425-3p	0	108
bta-miR-2425-5p	3	186
bta-miR-2426-3p	9	80
bta-miR-2426-5p	0	6
bta-miR-2427	1	17
bta-miR-2428-3p	0	1
bta-miR-2428-5p	0	1
bta-miR-2430	0	1
bta-miR-2431-3p	7	182
bta-miR-2431-5p	31	2078
bta-miR-2432	3	38
bta-miR-2433	0	1
bta-miR-2435-3p	0	15
bta-miR-2435-5p	2	446
bta-miR-2436	2	2
bta-miR-2436-5p	1	14
bta-miR-2438	3	17
bta-miR-2439-3p	0	5
bta-miR-2439-5p	0	23
bta-miR-24-3p	62504	119453
bta-miR-2440	2	696
bta-miR-2441-3p	11	174
bta-miR-2441-5p	0	4
bta-miR-2443-3p	0	47
bta-miR-2443-5p	18	513
bta-miR-2446	2	228
bta-miR-2447-3p	0	125
bta-miR-2447-5p	44	610
bta-miR-2448-3p	336	1538
bta-miR-2448-5p	336	1156
bta-miR-2449	4	4
bta-miR-2450a	19	232
bta-miR-2450c	8	2
bta-miR-2451-3p	3	14
bta-miR-2451-5p	0	6
bta-miR-2453	3	181
bta-miR-2454-3p	10	25
bta-miR-2454-5p	83	2477
bta-miR-2455	2	14
bta-miR-2457-3p	48	3707
bta-miR-2457-5p	0	1
bta-miR-2458	0	2
bta-miR-24-5p	1005	1365
bta-miR-2460	2	0
bta-miR-2461-5p	0	1
bta-miR-2463	1	40
bta-miR-2464	0	6
bta-miR-2464-5p	2	8
bta-miR-2465	0	13
bta-miR-2467-3p	0	2
bta-miR-2467-5p	0	8
bta-miR-2468-3p	3	130
bta-miR-2468-5p	1	51
bta-miR-2469	1	4
bta-miR-2472	0	3
bta-miR-2473	0	8
bta-miR-2474	44	15
bta-miR-2475-3p	7	193
bta-miR-2475-5p	0	88
bta-miR-2477	0	1
bta-miR-2478	286	9684
bta-miR-2483-3p	3	14
bta-miR-2483-5p	17	245
bta-miR-2484	18	1309
bta-miR-2485	0	17
bta-miR-25-3p	91539	8168659
bta-miR-25-5p	134	2561
bta-miR-26a-3p	5	569
bta-miR-26a-5p	30648	2126422
bta-miR-26b-3p	113	1839
bta-miR-26b-5p	1791	69532
bta-miR-27a-3p	491	1030
bta-miR-27a-5p	25234	28041
bta-miR-27b-3p	18439	200779
bta-miR-27b-5p	14	140
bta-miR-28-3p	1960	27358
bta-miR-28-5p	179	5048
bta-miR-2885	1	0
bta-miR-2887-2	7	0
bta-miR-2887-3p	55	5875
bta-miR-2887-5p	0	22
bta-miR-2890	0	1
bta-miR-2903	11	651
bta-miR-2904-3	31	41
bta-miR-296-3p	265	7592
bta-miR-296-5p	2164	12075
bta-miR-299-2	43	0
bta-miR-299-3p	107	40
bta-miR-299-5p	0	18
bta-miR-29a-3p	9451	23656
bta-miR-29a-5p	3	56
bta-miR-29b-2	7	0
bta-miR-29b-3p	174	5968
bta-miR-29b-5p	10	162
bta-miR-29c	77	4112
bta-miR-29d-3p	41	2
bta-miR-29d-5p	155	2439
bta-miR-29e	0	13
bta-miR-301a-3p	6	689
bta-miR-301a-5p	20	855
bta-miR-301b-3p	25	165
bta-miR-301b-5p	3	3
bta-miR-3064-3p	0	6
bta-miR-3064-5p	12	76
bta-miR-30a-3p	318	3442
bta-miR-30a-5p	7727	4277
bta-miR-30b-3p	38	358
bta-miR-30b-5p	313	36974
bta-miR-30c	3849	1157828
bta-miR-30d-3p	20	635
bta-miR-30d-5p	124722	761000
bta-miR-30e	0	4771
bta-miR-30e-3p	1269	72399
bta-miR-30e-5p	7422	77989
bta-miR-30f-3p	1	19
bta-miR-30f-5p	227	7282
bta-miR-31	3	176
bta-miR-3120-3p	17	83
bta-miR-3120-5p	7	27
bta-miR-3154-3p	0	11
bta-miR-3154-5p	0	1
bta-miR-320a-3p	48905	174996
bta-miR-320a-5p	2	10
bta-miR-320b	83	7
bta-miR-323	13	176
bta-miR-323b-3p	5	83
bta-miR-32-3p	9	26
bta-miR-324-3p	14	154
bta-miR-324-5p	2	70
bta-miR-32-5p	157	4293
bta-miR-326-3p	885	6750
bta-miR-326-5p	1	2
bta-miR-328-3p	3683	139515
bta-miR-328-5p	5	1
bta-miR-329a	2	9
bta-miR-329b	16	185
bta-miR-330-3p	4558	17239
bta-miR-330-5p	210	6988
bta-miR-331-3p	99	13154
bta-miR-331-5p	995	24359
bta-miR-335-3p	26	1389
bta-miR-335-5p	4	100
bta-miR-338-3p	3	199
bta-miR-338-5p	224	684
bta-miR-339b-3p	2828	573000
bta-miR-339b-5p	68	399
bta-miR-33a-3p	3	0
bta-miR-33a-5p	17	30
bta-miR-33b	0	4
bta-miR-340-3p	26	17029
bta-miR-340-5p	80	57117
bta-miR-342-3p	1460	388999
bta-miR-342-5p	362	1359
bta-miR-3431-3p	58	957
bta-miR-3431-5p	245	3479
bta-miR-3432a-3p	108	589
bta-miR-3432a-5p	4248	2914
bta-miR-3432b	138	118
bta-miR-345-3p	10	631
bta-miR-345-5p	1927	6045
bta-miR-346	6	27
bta-miR-34a	7	70
bta-miR-34b-3p	35	2882
bta-miR-34b-5p	1	24
bta-miR-34c-3p	0	43
bta-miR-34c-5p	5	394
bta-miR-3533	16	6
bta-miR-3604	0	1
bta-miR-3613a-3p	13	182
bta-miR-3613a-5p	2	15
bta-miR-361-3p	7810	447722
bta-miR-361-5p	2290	52121
bta-miR-362-3p	1	23
bta-miR-362-5p	3	1037
bta-miR-363-3p	158	1251
bta-miR-363-5p	10	41
bta-miR-365-1	46	0
bta-miR-365-3p	450	3252
bta-miR-365-5p	512	3245
bta-miR-3660	0	4
bta-miR-369-5p	11	9
bta-miR-370	44	28
bta-miR-371	1	0
bta-miR-374a-3p	68	1872
bta-miR-374a-5p	32	171
bta-miR-374b-3p	6	45
bta-miR-374b-5p	87	19155
bta-miR-374c	1	4
bta-miR-375	49901	28452
bta-miR-376a	0	1
bta-miR-376c-3p	1	11
bta-miR-376c-5p	0	1
bta-miR-377	0	3
bta-miR-378-3p	10742	76512
bta-miR-378-5p	25	2137
bta-miR-378b	81	740
bta-miR-378c	1733	7997
bta-miR-378d	171	156
bta-miR-379-3p	5	3
bta-miR-379-5p	64	144
bta-miR-380-3p	1	0
bta-miR-380-5p	6	7
bta-miR-381	107	384
bta-miR-382-3p	5	62
bta-miR-382-5p	219	135
bta-miR-383	7	20
bta-miR-3956	26	11
bta-miR-3957	1	4
bta-miR-409a-3p	1497	1342
bta-miR-409a-5p	8	11
bta-miR-410	5	4
bta-miR-411a-3p	6	1
bta-miR-411a-5p	36	33
bta-miR-411b-3p	0	1
bta-miR-411b-5p	0	6
bta-miR-411c	0	1
bta-miR-411c-5p	1	14
bta-miR-412-3p	49	14
bta-miR-412-5p	0	4
bta-miR-421-3p	615	6416
bta-miR-421-5p	0	6
bta-miR-423-3p	58747	970509
bta-miR-423-5p	328575	2987538
bta-miR-424-3p	17	14
bta-miR-424-5p	52	27
bta-miR-425-3p	147	4221
bta-miR-425-5p	2129	390925
bta-miR-4286	5	0
bta-miR-4286-2	2	675
bta-miR-429	72	1
bta-miR-431	0	7
bta-miR-432	136	111
bta-miR-433	85	203
bta-miR-4444-3p	1	20
bta-miR-4444-5p	0	1
bta-miR-4449	3	18
bta-miR-449a	0	1
bta-miR-449d	3	2
bta-miR-450a-3p	0	2
bta-miR-450a-5p	4	110
bta-miR-450b-3p	0	7
bta-miR-450b-5p	8	52
bta-miR-451	51684	25527699
bta-miR-4523	0	2
bta-miR-452-3p	0	242
bta-miR-452-5p	25	292
bta-miR-454-3p	2	0
bta-miR-454-5p	6	1348
bta-miR-455-3p	10	11
bta-miR-455-5p	446	36
bta-miR-4657	5	9
bta-miR-4680	0	1
bta-miR-483	19	225
bta-miR-484	3871	462177
bta-miR-485-3p	9	12
bta-miR-485-5p	76	59
bta-miR-486-3p	52	1151
bta-miR-486-5p	204790	51127316
bta-miR-487a-3p	0	11
bta-miR-487a-5p	0	2
bta-miR-487b	8	6
bta-miR-490	5	1
bta-miR-491-3p	0	192
bta-miR-491-5p	10	929
bta-miR-493-3p	57	260
bta-miR-493-5p	19	36
bta-miR-494	43	511
bta-miR-495	22	136
bta-miR-497	7	8
bta-miR-499-3p	0	2
bta-miR-499-5p	294	1928
bta-miR-500-3p	86	2309
bta-miR-500-5p	3	91
bta-miR-502a	24	134
bta-miR-502b-3p	13	145
bta-miR-502b-5p	2	34
bta-miR-503-3p	1	0
bta-miR-503-5p	7	11
bta-miR-504	248	271
bta-miR-505-3p	281	36223
bta-miR-505-5p	151	2539
bta-miR-507-3p	8	6
bta-miR-507b	4	21
bta-miR-532-3p	50	4373
bta-miR-532-5p	5880	21972
bta-miR-539	0	10
bta-miR-541	11	0
bta-miR-542-5p	1	8
bta-miR-543-3p	333	217
bta-miR-543-5p	3	1
bta-miR-545-3p	2	1
bta-miR-545-5p	0	16
bta-miR-551b	0	1
bta-miR-574-3p	2368	88892
bta-miR-574-5p	861	2015
bta-miR-582	0	7
bta-miR-592	2	17
bta-miR-599	50	98
bta-miR-6119-3p	5	9999
bta-miR-6119-5p	30	22076
bta-miR-6120-3p	1	38
bta-miR-6120-5p	173	25094
bta-miR-6123-3p	1	29
bta-miR-6123-5p	65	10406
bta-miR-615-3p	1733	124
bta-miR-615-5p	3	0
bta-miR-628-3p	210	790
bta-miR-628-5p	5	348
bta-miR-6501	2	4
bta-miR-6516-3p	2	31
bta-miR-6516-5p	2	14
bta-miR-6517-3p	1	4
bta-miR-6517-5p	297	14095
bta-miR-6518	3	1
bta-miR-6520-3p	4	352
bta-miR-6520-5p	46	926
bta-miR-6521	4	0
bta-miR-6522	3	4
bta-miR-6523a-3p	0	5
bta-miR-6523a-5p	201	3406
bta-miR-652-3p	689	21785
bta-miR-6524-3p	68	18337
bta-miR-6524-5p	0	5
bta-miR-6525-3p	27	464
bta-miR-6525-5p	1	350
bta-miR-652-5p	530	110
bta-miR-6526	0	8
bta-miR-6526-3	2	0
bta-miR-6527	13	23
bta-miR-6528	0	1
bta-miR-6529a-3p	699	22746
bta-miR-6529a-5p	28246	87452
bta-miR-6530	0	1
bta-miR-6531	1	52
bta-miR-6532-3p	9	160
bta-miR-6532-5p	0	40
bta-miR-6533-3p	5	364
bta-miR-6533-5p	0	10
bta-miR-6534-3p	22	58
bta-miR-6534-5p	0	5
bta-miR-6535	13	4
bta-miR-6536	1	127
bta-miR-6536-2	0	11
bta-miR-654-3p	6	47
bta-miR-654-5p	1	11
bta-miR-655	1	8
bta-miR-656	0	4
bta-miR-660	1702	10632
bta-miR-664a-3p	13	659
bta-miR-664a-5p	0	14
bta-miR-664b-3p	70	25257
bta-miR-664b-5p	1	1209
bta-miR-665	9	4
bta-miR-668-3p	0	1
bta-miR-671-3p	201	5026
bta-miR-6715-3p	0	13
bta-miR-6715-5p	0	5
bta-miR-671-5p	11	210
bta-miR-677	142	124
bta-miR-6775-3p	21	2219
bta-miR-6775-5p	0	13
bta-miR-708-3p	506	145
bta-miR-708-5p	0	1
bta-miR-7180	54	545
bta-miR-7-3p	42	2784
bta-miR-744-3p	3	96
bta-miR-744-5p	4712	26832
bta-miR-758	0	3
bta-miR-7-5p	953	142565
bta-miR-760-3p	3	11
bta-miR-760-5p	7205	4130
bta-miR-761	0	4
bta-miR-767	2	0
bta-miR-769-3p	0	7
bta-miR-769-5p	636	11292
bta-miR-7857-2	25	0
bta-miR-7857-3p	165	3238
bta-miR-7857-5p	489	70523
bta-miR-7858	2	3
bta-miR-7859-3p	66	1837
bta-miR-7859-5p	0	1
bta-miR-7860-3p	45	4148
bta-miR-7860-5p	175	4378
bta-miR-7861-3p	1	10
bta-miR-7861-5p	17	411
bta-miR-7862-3p	0	2
bta-miR-7862-5p	7	9
bta-miR-7863-3p	0	1
bta-miR-7863-5p	1	26
bta-miR-7864-3p	0	1
bta-miR-7864-5p	0	5
bta-miR-7865	44	2805
bta-miR-8549	0	16
bta-miR-8550	3	0
bta-miR-874-3p	1157	2298
bta-miR-874-5p	1	6
bta-miR-875	2	0
bta-miR-877-3p	13	23
bta-miR-877-5p	133	503
bta-miR-885-3p	30	44
bta-miR-885-5p	77	938
bta-miR-9-2	4	0
bta-miR-92a-3p	59102	7856434
bta-miR-92a-5p	37	63
bta-miR-92b-3p	1124	15262
bta-miR-92b-5p	42	112
bta-miR-93-3p	11	223
bta-miR-935	10	206
bta-miR-93-5p	2831	167121
bta-miR-9-3p	16	1343
bta-miR-940	5	15
bta-miR-95	123	167
bta-miR-9-5p	1	263
bta-miR-96	0	12
bta-miR-98-3p	19	2466
bta-miR-9851	9	2
bta-miR-98-5p	2155	15856
bta-miR-99a-3p	2	9
bta-miR-99a-5p	63560	3541074
bta-miR-99b-3p	75	21
bta-miR-99b-5p	1561	3182

## Sheet: Table S2
Table S2. Novel miRNAs identified from serum and white blood cell
miRNA	mature sequence	Chromosome/Scaffold	Precursor start	Precursor end	Strand	Total number in serum	Total number in WBC	Number of serum samples	Number of WBC samples	Reported
bta-novel-miR6-3p	aaaaccucaacgaacucuuugg	2	114749768	114749828	-	520	152884	4	14	Yes
bta-novel-miR176-3p	uccugcuuggaucucccucuca	15	48274260	48274315	-	163	59407	8	14	Yes
bta-novel-miR136-3p	cucuucucugaucccuggcaga	7	44175748	44175801	-	454	52832	14	14	Yes
bta-novel-miR116-3p	ucugucugacuuacuucauuc	5	119287398	119287456	+	3	38038	1	14	Yes
bta-novel-miR208-5p	gaaccguuaccauuacua	19	20238540	20238582	+	0	34159	0	14	Yes
bta-novel-miR28-5p	uuucuaaugagucagcucuuu	12	32330927	32330989	+	0	31993	0	14	Yes
bta-novel-miR99-5p	agaguggaacacgacugagcag	4	103601685	103601753	-	83	29315	3	14	Yes
bta-novel-miR134-3p	cucugcccgcucucugucuuacagc	7	18068302	18068389	+	156	27057	7	14	Yes
bta-novel-miR191-3p	uccgccaccuaccagccccaga	18	13773219	13773279	+	21	18732	3	14	Yes
bta-novel-miR54-5p	aagguagauagaacaggucuug	21	23034426	23034486	+	82	17407	1	14	Yes
bta-novel-miR26-3p	aaccgcgaguggcugaaccuug	11	72585221	72585276	-	612	15862	14	14	Yes
bta-novel-miR235-5p	gacagaucuguccugaaacc	23	2856942	2857011	-	0	11928	0	14	Yes
bta-novel-miR7-5p	agaguucccuggacagcaagg	4	9646177	9646239	-	308	10025	13	14	Yes
bta-novel-miR238-5p	augccuuccccagccuccgagc	23	27534896	27534953	+	20	8170	4	14	Yes
bta-novel-miR198-5p	uucacaguagcuaaguucugu	18	48254583	48254642	-	365	8029	10	14	Yes
bta-novel-miR113-5p	auguccgcggguucccugucc	5	111568833	111568893	+	4	7539	1	14	Yes
bta-novel-miR246-5p	ucuccugcucucccacucuga	25	395527	395589	+	0	7155	0	14	Yes
bta-novel-miR7-3p	agaguucccuggacagcaagg	4	9646177	9646239	-	116	5845	13	14	Yes
bta-novel-miR267-3p	ugggucgcgaccucucccuggua	28	5833249	5833308	+	52	5739	4	14	Yes
bta-novel-miR83-3p	aucugagacuguugauauuuc	2	4721962	4722024	+	0	5525	0	14	Yes
bta-novel-miR186-3p	ccucagccgcccccccucacaca	17	45189728	45189788	-	1	5475	1	14	Yes
bta-novel-miR176-5p	uccugcuuggaucucccucuca	15	48274260	48274315	-	18	3440	8	14	Yes
bta-novel-miR244-5p	ugagugacuagacugaacuga	24	47573857	47573919	-	0	3300	0	14	Yes
bta-novel-miR115-3p	aaaaucugaaugaacuuuuugg	5	114770052	114770110	-	0	3270	0	14	Yes
bta-novel-miR277-3p	ucagcguugagucucccucc	29	50674547	50674604	+	0	3262	0	14	Yes
bta-novel-miR216-3p	ucacggccucucugcccccagg	19	55775764	55775831	+	134	3201	7	14	Yes
bta-novel-miR116-5p	ucugucugacuuacuucauuc	5	119287398	119287456	+	5	3118	1	14	Yes
bta-novel-miR54-3p	aagguagauagaacaggucuug	21	23034426	23034486	+	1	3062	1	14	Yes
bta-novel-miR221-3p	ucugacuucaccugggauucc	20	71466458	71466512	-	0	2943	0	14	Yes
bta-novel-miR77-3p	gaaaaccugaaugaccauuuug	1	84168592	84168651	+	0	2575	0	14	Yes
bta-novel-miR78-3p	aaaaccucaaugaacuuuuugg	1	84343738	84343796	+	0	2509	0	14	Yes
bta-novel-miR33-3p	uucucagguuggacaguccuga	13	53904037	53904098	-	51	2490	4	14	Yes
bta-novel-miR224-5p	ucuguggcuccucugguccucu	21	57658052	57658115	-	0	2438	0	14	Yes
bta-novel-miR148-5p	auccuggacuugcggacagagagc	8	110162625	110162686	-	0	2382	0	14	Yes
bta-novel-miR272-3p	aaggcacugucuccccugcagu	29	40394582	40394670	-	0	2111	0	14	Yes
bta-novel-miR64-3p	ugcgguagagcaucagagaacu	28	24750916	24750977	+	10	2018	3	14	Yes
bta-novel-miR172-3p	cuuccaguuaauagcucuguua	14	81805970	81806034	+	0	1942	0	14	Yes
bta-novel-miR140-3p	uuaguuauuagaccucucagc	7	81526135	81526194	-	0	1934	0	14	Yes
bta-novel-miR239-3p	ucacgcccugcucugaccccagu	23	27542508	27542589	+	0	1915	0	14	Yes
bta-novel-miR249-3p	acugacugagcuccccgccaca	25	1760066	1760136	+	0	1774	0	14	Yes
bta-novel-miR157-3p	aaaaacccgaaugacccuuuug	11	37128316	37128363	+	0	1731	0	14	Yes
bta-novel-miR57-3p	ugaaauguuuaggaccacuaga	21	68645105	68645167	+	1607	1667	14	14	Yes
bta-novel-miR108-3p	uucagccauguccucuuugcga	5	87701229	87701288	+	2	1595	1	14	Yes
bta-novel-miR167-5p	uuccuccccgaggacgugugccg	12	14802000	14802053	-	0	1571	0	14	Yes
bta-novel-miR175-3p	uguucuguccgucccccuccagc	15	40435474	40435531	-	0	1555	0	14	Yes
bta-novel-miR206-3p	gaaccagauugucagcucuaac	19	11116407	11116478	+	0	1475	0	14	Yes
bta-novel-miR243-1-3p	ugacggccccucucccugcagc	23	41496443	41496508	-	0	1443	0	14	Yes
bta-novel-miR243-5p	ugacggccccucucccugcag	23	41496404	41496465	-	0	1443	0	14	Yes
bta-novel-miR223-3p	uuccacucggcaggcuguca	21	45597404	45597461	+	0	1385	0	14	Yes
bta-novel-miR53-3p	ucuuugguuaucuagcuguauga	21	20839106	20839164	+	0	1343	0	14	Yes
bta-novel-miR64-5p	ugcgguagagcaucagagaacu	28	24750916	24750977	+	6	1332	3	14	Yes
bta-novel-miR13-1-5p	aaaaagaucguucggguuuuu	19	45341829	45341890	-	0	1307	0	14	Yes
bta-novel-miR13-5p	aaaaagaucguucggguuuuu	6	92398700	92398761	+	0	1299	0	14	Yes
bta-novel-miR195-3p	uccguggucccccuucugcag	18	36462265	36462323	+	0	1251	0	14	Yes
bta-novel-miR106-5p	cuaggcugaagcuccuugu	5	67384539	67384606	-	0	1229	0	14	Yes
bta-novel-miR258-3p	ugccagacggucucugcccugc	25	37293435	37293499	-	0	1223	0	14	Yes
bta-novel-miR162-3p	aaaaacucaaaugaacuucuug	11	98471067	98471126	+	0	1206	0	14	Yes
bta-novel-miR139-3p	aaacugggcugaacuuuuuggc	7	70741317	70741378	-	0	1188	0	14	Yes
bta-novel-miR125-3p	aaaaccugagugaacucuuugg	7	7138859	7138919	+	0	1129	0	14	Yes
bta-novel-miR156-3p	ugaagccgccggucuccccagc	11	9967341	9967402	-	0	1061	0	14	Yes
bta-novel-miR89-3p	uugacccuccucuuuccacaga	3	14532153	14532218	+	0	1057	0	14	Yes
bta-novel-miR154-5p	aaaauguucauuuggguuucucu	10	92204668	92204727	-	0	1044	0	14	Yes
bta-novel-miR204-3p	uccgucuucccaccccacaga	18	62306409	62306467	+	0	1037	0	14	Yes
bta-novel-miR210-3p	agcugcuuccccugacacucagg	19	34963125	34963190	-	4	1031	1	14	Yes
bta-novel-miR270-3p	uuugcuuccuuggcugucucca	29	29738394	29738448	+	0	998	0	14	Yes
bta-novel-miR253-3p	acuccccaucucccuuccagc	25	21339573	21339647	+	0	989	0	14	Yes
bta-novel-miR190-3p	cucgauugcacuggccaccgucu	17	72957674	72957736	+	0	975	0	14	Yes
bta-novel-miR197-3p	ccucacugucucugcucugcagg	18	46584834	46584895	-	0	963	0	14	Yes
bta-novel-miR81-3p	ucuccaugcuguuggcucugccugg	1	145938241	145938300	-	0	920	0	14	Yes
bta-novel-miR102-3p	cucgaucugucccugcucagcc	5	30491362	30491426	-	0	917	0	14	Yes
bta-novel-miR114-3p	uccauccccucuugcccaccagu	5	112488155	112488220	+	0	917	0	14	Yes
bta-novel-miR15-3p	ucacuucagucguaucucacucu	7	60742516	60742578	-	0	911	0	14	Yes
bta-novel-miR276-3p	acggucccucuguucccacagg	29	43827203	43827281	+	0	903	0	14	Yes
bta-novel-miR218-3p	aggaacccagaugaacuuucuc	19	62767810	62767868	+	0	901	0	14	Yes
bta-novel-miR34-3p	ugagguaguagguugugguc	13	55631829	55631871	-	302	896	13	14	Yes
bta-novel-miR118-3p	ucucccccuggccuccaccgugc	6	113381691	113381747	+	0	836	0	14	Yes
bta-novel-miR275-5p	ucuucccacccagugcacccagc	29	43424127	43424183	+	0	808	0	14	Yes
bta-novel-miR201-3p	ugccuuccaccucugcccccagg	18	56230137	56230204	+	0	779	0	14	Yes
bta-novel-miR165-3p	aucuguauaaugggaaggugga	12	11604215	11604273	+	0	767	0	14	Yes
bta-novel-miR30-3p	aaaucccacccuaugagaguuca	13	10242601	10242660	-	26	740	3	14	Yes
bta-novel-miR133-3p	cugccuggaccccugcucacc	7	14887735	14887792	-	12	735	1	14	Yes
bta-novel-miR163-3p	ugaccucugcuccucccccagg	11	104358966	104359030	+	0	735	0	14	Yes
bta-novel-miR152-3p	cgcaggcggcgggagcgggacgg	10	53416763	53416828	-	79	724	5	14	Yes
bta-novel-miR150-3p	uccaacucugcaaccaugugg	9	104050223	104050280	-	0	718	0	14	Yes
bta-novel-miR164-3p	uccgccuccuguccucugcccuca	11	104821565	104821626	-	0	716	0	14	Yes
bta-novel-miR154-3p	aaaauguucauuuggguuucucu	10	92204668	92204727	-	0	677	0	14	Yes
bta-novel-miR259-5p	ucagugcccguguccacccccu	25	38043179	38043240	-	0	638	0	14	Yes
bta-novel-miR251-3p	ugacucaucccuccugcccucagg	25	3447709	3447773	-	0	630	0	14	Yes
bta-novel-miR211-5p	aucgccucuguucucuccacagu	19	40348149	40348214	-	0	624	0	14	Yes
bta-novel-miR158-3p	uaccuguccuccaggagcua	11	46958400	46958445	-	0	615	0	14	Yes
bta-novel-miR215-3p	uccucacugccugccucucccuaca	19	53548738	53548807	+	0	612	0	14	Yes
bta-novel-miR180-3p	uacagccugacccuucucugugc	16	51093647	51093701	-	0	593	0	14	Yes
bta-novel-miR135-5p	uaacaccccugagcucuugga	7	43465852	43465913	+	0	579	0	14	Yes
bta-novel-miR129-3p	ugaccccggcuccccugcagc	7	12794964	12795016	+	0	568	0	14	Yes
bta-novel-miR268-3p	caggcgaucucccacuuccagg	28	24751593	24751663	+	0	565	0	14	Yes
bta-novel-miR209-3p	uuuuucucucuucccaucucaga	19	27853494	27853574	-	0	536	0	14	Yes
bta-novel-miR263-3p	ccccggccccagggaccucuccu	26	51975001	51975062	-	0	493	0	14	Yes
bta-novel-miR244-3p	ugagugacuagacugaacuga	24	47573857	47573919	-	0	478	0	14	Yes
bta-novel-miR241-3p	uugcaugacucugagaguaag	23	32855275	32855331	+	0	453	0	14	Yes
bta-novel-miR214-3p	agggagucccugguaguucagu	19	46101778	46101840	-	0	446	0	14	Yes
bta-novel-miR235-3p	gacagaucuguccugaaacc	23	2856942	2857011	-	0	432	0	14	Yes
bta-novel-miR84-3p	cggaccgaguccccuuccccuc	2	22797965	22798031	-	0	424	0	14	Yes
bta-novel-miR15-5p	ucacuucagucguaucucacucu	7	60742516	60742578	-	0	423	0	14	Yes
bta-novel-miR99-3p	agaguggaacacgacugagcag	4	103601685	103601753	-	12	415	2	14	Yes
bta-novel-miR45-5p	gaugaggcucagcgagcccuggg	17	60624769	60624831	-	0	356	0	14	Yes
bta-novel-miR28-3p	uuucuaaugagucagcucuuu	12	32330927	32330989	+	13	274	9	14	Yes
bta-novel-miR108-5p	uucagccauguccucuuugcga	5	87701229	87701288	+	1	263	1	14	Yes
bta-novel-miR136-5p	cucuucucugaucccuggcaga	7	44175748	44175801	-	20	243	12	14	Yes
bta-novel-miR263-5p	ccccggccccagggaccucuccu	26	51975001	51975062	-	0	238	0	14	Yes
bta-novel-miR83-5p	aucugagacuguugauauuuc	2	4721962	4722024	+	0	227	0	14	Yes
bta-novel-miR122-3p	ucggcaccccggaucgcucucu	6	117533369	117533428	+	0	1824	0	13	Yes
bta-novel-miR37-3p	ugagguaguaguuugugu	14	13823320	13823385	+	40	1521	4	13	Yes
bta-novel-miR159-3p	ugccucuccgccaccuccaccu	11	47993876	47993929	+	0	1236	0	13	Yes
bta-novel-miR159-1-5p	ugccucuccgccaccuccacc	11	47993907	47993969	+	0	1236	0	13	Yes
bta-novel-miR252-5p	uggggcacuggacuacgugguc	25	3507269	3507336	-	0	1163	0	13	Yes
bta-novel-miR82-3p	uucagucgcucauucgugucacg	1	154301388	154301451	-	0	1012	0	13	Yes
bta-novel-miR80-3p	cuagugcauggucuugggcuugu	1	117569834	117569895	-	17	894	1	13	Yes
bta-novel-miR137-3p	cuacuccuugcucuccccaccucc	7	44179944	44180000	-	0	877	0	13	Yes
bta-novel-miR260-5p	acaaagagucggacaugacuua	26	31711493	31711550	+	0	795	0	13	Yes
bta-novel-miR41-3p	aaaaauccgaacgaacuuuuugg	16	3159795	3159855	+	0	736	0	13	Yes
bta-novel-miR226-3p	uggccugucuccucccgcucagg	21	65239337	65239398	-	0	585	0	13	Yes
bta-novel-miR232-3p	agccucucuuccggcuuuagc	22	59489657	59489716	-	0	518	0	13	Yes
bta-novel-miR227-3p	uccccuuccuuccggccuccgcc	21	68244210	68244276	+	0	464	0	13	Yes
bta-novel-miR149-3p	cacgcucaugcacacgccu	8	111539560	111539636	-	0	456	0	13	Yes
bta-novel-miR230-3p	aacgggagugaucgugucauu	22	50971474	50971533	-	5	418	1	13	Yes
bta-novel-miR231-5p	aggagagcuccagccccacgg	22	51401171	51401225	-	0	408	0	13	Yes
bta-novel-miR196-3p	ggccucccuguaaugcucugc	18	36681211	36681271	+	0	396	0	13	Yes
bta-novel-miR212-5p	acugguaaagggggcuuuguc	19	43164058	43164118	+	0	392	0	13	Yes
bta-novel-miR250-3p	uacccgugaucgcucagcuucc	25	2838355	2838411	-	0	388	0	13	Yes
bta-novel-miR237-5p	ggacguccagacucaacucu	23	7394816	7394880	-	0	386	0	13	Yes
bta-novel-miR189-3p	ugaccccagucuccucccgcaga	17	72565280	72565339	-	0	380	0	13	Yes
bta-novel-miR266-3p	cugccuucugcucgacccugcaggu	27	37738149	37738213	+	0	380	0	13	Yes
bta-novel-miR217-3p	cgcccucugucugucucccccgc	19	61696771	61696838	+	0	357	0	13	Yes
bta-novel-miR153-3p	caccccagguuggaaagagcugg	10	79601368	79601428	-	0	330	0	13	Yes
bta-novel-miR269-3p	aaacaagaucacgucucucaga	29	12872754	12872814	+	0	292	0	13	Yes
bta-novel-miR91-5p	cccgcuccgucggcugcuguc	3	49582056	49582111	+	0	273	0	13	Yes
bta-novel-miR174-3p	aaguuuaaagaagucugccuugu	15	39061847	39061923	-	0	239	0	13	Yes
bta-novel-miR213-5p	uucccgccggcguaugcugcugu	19	43246184	43246258	-	0	2401	0	12	Yes
bta-novel-miR213-1-5p	uucccgccggcguaugcugcugu	19	43283900	43283974	-	0	2371	0	12	Yes
bta-novel-miR194-3p	aaucccacuccuggcacca	18	18865132	18865200	-	0	1347	0	12	Yes
bta-novel-miR138-3p	uccuccuccucccgcacucgagc	7	44182776	44182840	-	0	1098	0	12	Yes
bta-novel-miR145-3p	ucucaucauccuucuuccccaga	8	59341318	59341387	-	0	985	0	12	Yes
bta-novel-miR41-1-3p	aaaaauccgaacgaacuuuuugg	21	57156230	57156288	-	8	701	3	12	Yes
bta-novel-miR240-3p	ugcguccuaggcccccggcucua	23	27605759	27605811	+	0	529	0	12	Yes
bta-novel-miR97-3p	ugccucuguuccccgcccagu	3	113150201	113150263	+	0	511	0	12	Yes
bta-novel-miR72-5p	gaaaaguucguuuggguuuuc	X	104619210	104619269	+	29	448	2	12	Yes
bta-novel-miR193-3p	uugcucuccacccugaucucca	18	14601586	14601651	+	0	438	0	12	Yes
bta-novel-miR151-3p	ccaggcucaguccccucca	10	19266875	19266926	-	0	426	0	12	Yes
bta-novel-miR169-3p	ccagauccucuugcaucccccacc	12	86183679	86183738	-	0	426	0	12	Yes
bta-novel-miR110-3p	ucagcaccccuucaacuccagc	5	103854738	103854799	+	0	401	0	12	Yes
bta-novel-miR109-3p	ccucauguggaaucuuuaguugu	5	100200427	100200494	+	0	388	0	12	Yes
bta-novel-miR202-3p	ccaccgccugcccucaccugc	18	56570944	56571003	+	0	376	0	12	Yes
bta-novel-miR225-3p	ucccucgccagcgccgcccucc	21	57753100	57753154	+	0	372	0	12	Yes
bta-novel-miR229-3p	uuccuccucccccuuuccgccc	22	43607248	43607304	+	0	369	0	12	Yes
bta-novel-miR184-3p	cuggcuucccuccgacgugucc	17	44947530	44947589	-	0	337	0	12	Yes
bta-novel-miR279-3p	aacucccugugugcccucucccc	X	37168410	37168470	-	0	336	0	12	Yes
bta-novel-miR177-5p	ccucuguucccucugcuccgua	15	74672982	74673045	+	0	332	0	12	Yes
bta-novel-miR98-3p	cugaccccccaacugcugcagu	4	92572506	92572561	-	0	326	0	12	Yes
bta-novel-miR88-5p	ucccuguccuccgggagcug	2	135118878	135118928	-	0	312	0	12	Yes
bta-novel-miR273-1-3p	cuuucccaggaacugcuguga	29	40406914	40406970	-	0	312	0	12	Yes
bta-novel-miR273-5p	cuuucccaggaacugcuguga	29	40406850	40406935	-	0	312	0	12	Yes
bta-novel-miR161-3p	uccgccuugugcuuccugcaga	11	98464109	98464170	+	0	304	0	12	Yes
bta-novel-miR262-3p	ccccgccaccaagccucuggacc	26	44281761	44281818	-	0	294	0	12	Yes
bta-novel-miR179-3p	uuccccgcguugcucucuccgc	16	3387019	3387077	+	0	292	0	12	Yes
bta-novel-miR188-3p	ugaccccauccgcccugcagc	17	71512716	71512769	+	0	289	0	12	Yes
bta-novel-miR111-3p	ucccugcccuccaggagcuuc	5	106903366	106903418	+	0	285	0	12	Yes
bta-novel-miR242-5p	ucucuaguucuugcacgcucu	23	36522866	36522913	-	0	279	0	12	Yes
bta-novel-miR13-1-3p	aaaaagaucguucggguuuuu	19	45341829	45341890	-	0	243	0	12	Yes
bta-novel-miR203-3p	ugaacugacucugccccacag	18	61362825	61362893	+	0	4453	0	11	Yes
bta-novel-miR128-3p	ugaccucugaccuuugccuccca	7	12470174	12470227	+	0	1907	0	11	Yes
bta-novel-miR168-5p	aaagccugaaugaacucuuugg	12	19002097	19002157	-	0	1381	0	11	Yes
bta-novel-miR203-5p	ugaacugacucugccccacag	18	61362825	61362893	+	0	1142	0	11	Yes
bta-novel-miR92-3p	ccggccccgcgagcuccccgcga	3	78274097	78274166	+	0	776	0	11	Yes
bta-novel-miR75-3p	cacgcuccccggcccucccggua	1	71355709	71355761	-	0	555	0	11	Yes
bta-novel-miR112-3p	ccgcccaggacagcucacccggu	5	109491576	109491648	+	0	397	0	11	Yes
bta-novel-miR112-1-5p	ccgcccaggacagcucacccgg	5	109491625	109491695	+	0	397	0	11	Yes
bta-novel-miR187-3p	uaaaacccgagcuccuuguuag	17	60623295	60623356	+	0	367	0	11	Yes
bta-novel-miR271-3p	uguccuucucugcccuccagga	29	32122791	32122864	+	0	310	0	11	Yes
bta-novel-miR255-3p	ucuggcuccucuccccucuuagg	25	26212871	26212949	-	0	300	0	11	Yes
bta-novel-miR155-5p	ugaccucccacacucuccccagc	11	2802207	2802272	-	0	293	0	11	Yes
bta-novel-miR141-3p	uccgccgcucugucuccccgccuc	7	108793924	108793982	-	0	287	0	11	Yes
bta-novel-miR101-3p	cccacgugcccuaaagacugu	5	23210049	23210105	+	0	261	0	11	Yes
bta-novel-miR126-3p	ugccaugccugugcugucccagg	7	7884969	7885033	+	0	248	0	11	Yes
bta-novel-miR107-3p	aaacgaacuuuuuggccaaccca	5	72877870	72877939	-	0	243	0	11	Yes
bta-novel-miR248-3p	acggccugggcacugaggcgg	25	1531467	1531542	+	0	241	0	11	Yes
bta-novel-miR146-3p	acagaccuuccagccuuccagc	8	59896680	59896739	-	0	238	0	11	Yes
bta-novel-miR95-3p	agccccagcuccccaccccuuu	3	102650011	102650071	-	0	234	0	11	Yes
bta-novel-miR185-5p	uaggcucuagagugugugg	17	45148645	45148706	-	0	231	0	11	Yes
bta-novel-miR234-3p	ugacucgccccugcccccagc	22	59928562	59928630	+	0	231	0	11	Yes
bta-novel-miR278-5p	ucgccccgccccucugcacg	X	36222887	36222944	-	0	213	0	11	Yes
bta-novel-miR130-5p	cucaaccagacugauuuugc	7	13675758	13675818	-	0	208	0	11	Yes
bta-novel-miR280-3p	uccugugcugagcugccu	X	81376276	81376329	-	0	9315	0	10	Yes
bta-novel-miR85-3p	ugaccuucggucuccugucc	2	68092988	68093047	+	0	790	0	10	Yes
bta-novel-miR181-5p	uccgcgacgcuccccgagca	16	51270039	51270090	-	0	630	0	10	Yes
bta-novel-miR100-3p	ucugcucuguucccggccugc	4	116918450	116918505	-	0	361	0	10	Yes
bta-novel-miR257-3p	aaaaaacccgaauguaccuuuug	25	28487585	28487644	+	1	356	1	10	Yes
bta-novel-miR200-3p	uccagcaucucuuccuucuccc	18	54674002	54674063	+	0	275	0	10	Yes
bta-novel-miR103-3p	acacucugucccuuucuccagg	5	31000828	31000900	+	0	271	0	10	Yes
bta-novel-miR256-3p	ucuccuggucucuucccucagu	25	26267368	26267440	-	0	248	0	10	Yes
bta-novel-miR94-3p	ugagaacucugcgccgcgacc	3	101235227	101235282	+	0	236	0	10	Yes
bta-novel-miR93-1-3p	agauguuuucuccccugccagg	3	101036109	101036182	-	0	229	0	10	Yes
bta-novel-miR93-3p	agauguuuucuccccugccagg	3	101014679	101014752	-	0	229	0	10	Yes
bta-novel-miR87-5p	aggccuguuccucgaugcagcu	2	133789973	133790032	+	0	227	0	10	Yes
bta-novel-miR219-3p	cuguguaaaccuugugcugugc	20	8589998	8590060	-	0	221	0	10	Yes
bta-novel-miR90-3p	uccuccucgucggccucuucagc	3	20301960	20302011	-	0	219	0	10	Yes
bta-novel-miR274-3p	ugacuccucuccucccucccaga	29	43035482	43035544	-	0	202	0	10	Yes
bta-novel-miR286-5p	aaaaaguucguuuggguuuucu	NKLS02002208.1	9226877	9226926	+	0	3348	0	9	Yes
bta-novel-miR222-3p	aaacccggaugaacuuuuuggu	21	16052248	16052310	-	0	548	0	9	Yes
bta-novel-miR142-5p	acucucuguaacacacccucccu	8	39743728	39743783	+	0	282	0	9	Yes
bta-novel-miR104-3p	aaaacaugaaugaacuuuuugu	5	63087486	63087541	+	0	248	0	9	Yes
bta-novel-miR265-5p	cccgguacugagcugacccga	27	36572784	36572848	+	0	244	0	9	Yes
bta-novel-miR178-3p	uaucuuccaguaaucucugagu	15	76484261	76484329	+	0	233	0	9	Yes
bta-novel-miR127-5p	ugccaugccugugcugucccag	7	7885010	7885076	+	0	226	0	9	Yes
bta-novel-miR132-3p	uugaccgaugucccuccuccagg	7	14667284	14667345	+	0	210	0	9	Yes
bta-novel-miR170-5p	uggaccaccagggaaguuucu	13	52282717	52282787	-	0	4446	0	8	Yes
bta-novel-miR105-1-3p	aaaaccugaaugaacuauuugg	8	101955577	101955637	-	0	1120	0	8	Yes
bta-novel-miR228-5p	ucucaccgaccggaacugucc	22	16923886	16923965	+	0	427	0	8	Yes
bta-novel-miR124-3p	ucugacucuccccucugacccagg	7	5736697	5736764	+	0	289	0	8	Yes
bta-novel-miR166-3p	aaaaucugaaugaacuuuuagg	12	11774506	11774566	-	0	250	0	8	Yes
bta-novel-miR233-1-5p	cucgcccgccuccugcccucucg	22	59838587	59838649	-	0	247	0	8	Yes
bta-novel-miR233-5p	cucgcccgccuccugcccucu	22	59838530	59838610	-	0	247	0	8	Yes
bta-novel-miR119-3p	caugucaguagaggcgcgugugc	6	115667994	115668055	-	0	238	0	8	Yes
bta-novel-miR143-3p	caaaugaacuuucuggccaacc	8	41653032	41653105	+	0	232	0	8	Yes
bta-novel-miR236-3p	aaaaacccaaacgaacuuuuug	23	3759404	3759463	+	0	232	0	8	Yes
bta-novel-miR123-1-3p	cuggccugcgcuccuccccagg	7	2672729	2672787	-	0	225	0	8	Yes
bta-novel-miR171-3p	ccgcucacgcugccucgacccgc	14	323351	323410	-	0	220	0	8	Yes
bta-novel-miR192-5p	aucccaccucugccaccaag	18	14096925	14096990	+	0	1223	0	7	Yes
bta-novel-miR199-5p	ucagacacgacucagcgacu	18	52663313	52663370	-	0	1122	0	7	Yes
bta-novel-miR183-5p	agaccccguggauuguagcccg	17	7204049	7204091	+	0	1084	0	7	Yes
bta-novel-miR105-3p	aaaaccugaaugaacuauuugg	5	67169482	67169541	-	0	1035	0	7	Yes
bta-novel-miR173-3p	aaaaaguucguuuggguuu	15	24288991	24289052	-	0	1009	0	7	Yes
bta-novel-miR199-3p	ucagacacgacucagcgacu	18	52663313	52663370	-	0	677	0	7	Yes
bta-novel-miR121-2-3p	cacagcugcugagccugagc	6	116860164	116860220	+	0	549	0	7	Yes
bta-novel-miR121-1-5p	cacagcugcugagccugagc	6	116860100	116860185	+	0	547	0	7	Yes
bta-novel-miR121-5p	cacagcugcugagccugagc	6	116859944	116860029	+	0	547	0	7	Yes
bta-novel-miR121-3-5p	cacagcugcugagccugagc	6	116860200	116860285	+	0	545	0	7	Yes
bta-novel-miR96-3p	uuucucuuguguguccuccagc	3	113010204	113010264	+	0	500	0	7	Yes
bta-novel-miR74-5p	uucucauuggccucacguccug	1	7155009	7155060	-	0	272	0	7	Yes
bta-novel-miR207-3p	ugccugacucuccgcucuuca	19	19234602	19234659	+	0	260	0	7	Yes
bta-novel-miR86-3p	gaaauccgaacgaacuuuuugg	2	129449640	129449699	-	0	233	0	7	Yes
bta-novel-miR123-5p	cuggccugcgcuccuccccagg	7	2672677	2672751	-	0	203	0	7	Yes
bta-novel-miR144-5p	uaaaaaguucguuuggguuu	8	43119368	43119435	-	0	1337	0	6	Yes
bta-novel-miR182-3p	aaaaaccugaaugaaccuuuu	17	6839872	6839930	+	0	739	0	6	Yes
bta-novel-miR283-3p	aaaaccccaaugaacuuuuugg	X	121706360	121706418	-	0	708	0	6	Yes
bta-novel-miR76-3p	aaaaacccaaaugaacuuuuuga	1	80395856	80395917	-	0	689	0	6	Yes
bta-novel-miR47-3p	ugagugugugugugugagugu	19	17729205	17729256	-	647	624	3	6	Yes
bta-novel-miR117-3p	uccgagcgccgacgcagcccagc	6	101908177	101908225	-	19	599	4	6	Yes
bta-novel-miR205-3p	ucacagggcgcucucuuccagg	18	62946034	62946093	+	56	590	2	6	Yes
bta-novel-miR245-3p	aaaauccgaacaaacuuuuugg	24	56911715	56911775	+	0	323	0	6	Yes
bta-novel-miR282-5p	aaaaaguucauucggauucauc	X	104665787	104665846	-	42	310	4	6	Yes
bta-novel-miR160-3p	cuaucccuggcucccccguuuu	11	68587603	68587663	-	0	241	0	6	Yes
bta-novel-miR282-3p	aaaaaguucauucggauucauc	X	104665787	104665846	-	5	237	4	6	Yes
bta-novel-miR59-3p	aggcgccgccgcccccccc	26	961036	961085	+	6608	0	14	0	Yes
bta-novel-miR131-5p	ucccggguggucuaguggu	7	14499141	14499214	+	334	0	14	0	Yes
bta-novel-miR35-5p	ucccugguggucuaguggu	13	65122825	65122897	-	19104	0	13	0	Yes
bta-novel-miR52-5p	agaagccggcgggggcca	20	23282164	23282220	-	3742	0	13	0	Yes
bta-novel-miR2-3p	cgcgggguggagcagcuc	1	99229776	99229848	+	751	0	13	0	Yes
bta-novel-miR247-3p	gugguuaggacucggcgcucu	25	550229	550276	+	1889	0	11	0	Yes
bta-novel-miR31-5p	ucccugugguccagugguuaggau	13	40116167	40116239	-	775	0	11	0	Yes
bta-novel-miR284-1-3p	aaggcugagaugcgacccc	NKLS02002005.1	79464	79533	-	459	0	10	0	Yes
bta-novel-miR284-3p	aaggcugagaugcgacccc	NKLS02002005.1	68160	68235	+	459	0	10	0	Yes
bta-novel-miR254-3p	ggcggucgggcccgcgggg	25	21402317	21402389	+	217	0	10	0	Yes
bta-novel-miR264-5p	ugcggcguggcgggcggcggcuccc	27	6223980	6224039	-	326	0	8	0	Yes
bta-novel-miR220-5p	acacggacaggauugacaga	20	11050001	11050050	+	526495	0	7	0	Yes
bta-novel-miR79-5p	cccgguggucuagugguuaggauuc	1	90369895	90369964	-	4305	0	6	0	Yes
bta-novel-miR11-3p	agugguuaggauucggcgcu	5	114325903	114325971	+	1725	0	6	0	Yes
bta-novel-miR120-3p	ggugggucugggcggggcu	6	116790490	116790547	-	214	0	6	0	Yes
bta-novel-miR120-1-5p	ggugggucugggcggggcu	12	34532950	34533021	+	214	0	6	0	Yes
bta-novel-miR66-5p	cuggacuggagcuccuugagg	29	41900293	41900355	-	77	2815	3	4	No
bta-novel-miR281-3p	ccccucugucuacuccaccaga	X	86904671	86904741	+	20	1792	6	4	No
bta-novel-miR261-3p	uugagccugacagaucacaca	26	42408258	42408316	+	86	703	2	4	No
bta-novel-miR147-5p	aaaaaccugaaugaacucuuc	8	70382847	70382903	-	0	402	0	4	No
bta-novel-miR49-5p	acuggacuuggagucaga	19	39161045	39161086	-	68	369	3	4	No
bta-novel-miR269-5p	aaacaagaucacgucucucaga	29	12872754	12872814	+	0	192	0	13	No
bta-novel-miR30-5p	aaaucccacccuaugagaguuca	13	10242601	10242660	-	4	187	3	14	No
bta-novel-miR285-1-5p	ggugcagaucuuggugguaguagca	NKLS02002111.1	39253	39307	-	350	152	2	4	No
bta-novel-miR285-5p	ggugcagaucuuggugguaguagca	NKLS02002111.1	16062	16116	-	350	152	2	4	No
bta-novel-miR174-5p	aaguuuaaagaagucugccuugu	15	39061847	39061923	-	0	144	0	13	No
bta-novel-miR80-5p	cuagugcauggucuugggcuugu	1	117569834	117569895	-	0	141	0	13	No
bta-novel-miR231-3p	aggagagcuccagccccacgg	22	51401171	51401225	-	0	139	0	13	No
bta-novel-miR173-5p	aaaaaguucguuuggguuu	15	24288991	24289052	-	0	139	0	7	No
bta-novel-miR13-3p	aaaaagaucguucggguuuuu	6	92398700	92398761	+	21	130	12	14	No
bta-novel-miR260-3p	acaaagagucggacaugacuua	26	31711493	31711550	+	0	101	0	13	No
bta-novel-miR26-5p	aaccgcgaguggcugaaccuug	11	72585221	72585276	-	13	79	6	14	No
bta-novel-miR238-3p	augccuuccccagccuccgagc	23	27534896	27534953	+	8	73	4	12	No
bta-novel-miR140-5p	uuaguuauuagaccucucagc	7	81526135	81526194	-	0	70	0	14	No
bta-novel-miR165-5p	aucuguauaaugggaaggugga	12	11604215	11604273	+	0	69	0	13	No
bta-novel-miR168-3p	aaagccugaaugaacucuuugg	12	19002097	19002157	-	0	67	0	11	No
bta-novel-miR76-5p	aaaaacccaaaugaacuuuuuga	1	80395856	80395917	-	0	66	0	6	No
bta-novel-miR148-3p	auccuggacuugcggacagagagc	8	110162625	110162686	-	0	57	0	14	No
bta-novel-miR104-5p	aaaacaugaaugaacuuuuugu	5	63087486	63087541	+	0	47	0	9	No
bta-novel-miR286-3p	aaaaaguucguuuggguuuucu	NKLS02002208.1	9226877	9226926	+	0	46	0	7	No
bta-novel-miR82-5p	uucagucgcucauucgugucacg	1	154301388	154301451	-	0	43	0	11	No
bta-novel-miR191-5p	uccgccaccuaccagccccaga	18	13773219	13773279	+	9	42	3	14	No
bta-novel-miR105-5p	aaaaccugaaugaacuauuugg	5	67169482	67169541	-	0	42	0	7	No
bta-novel-miR145-5p	ucucaucauccuucuuccccaga	8	59341318	59341387	-	0	39	0	12	No
bta-novel-miR113-3p	auguccgcggguucccugucc	5	111568833	111568893	+	1	37	1	12	No
bta-novel-miR221-5p	ucugacuucaccugggauucc	20	71466458	71466512	-	0	36	0	12	No
bta-novel-miR180-5p	uacagccugacccuucucugugc	16	51093647	51093701	-	0	29	0	14	No
bta-novel-miR283-5p	aaaaccccaaugaacuuuuugg	X	121706360	121706418	-	0	29	0	4	No
bta-novel-miR96-5p	uuucucuuguguguccuccagc	3	113010204	113010264	+	0	27	0	7	No
bta-novel-miR144-3p	uaaaaaguucguuuggguuu	8	43119368	43119435	-	0	27	0	6	No
bta-novel-miR230-5p	aacgggagugaucgugucauu	22	50971474	50971533	-	3	26	1	12	No
bta-novel-miR246-3p	ucuccugcucucccacucuga	25	395527	395589	+	0	26	0	12	No
bta-novel-miR259-3p	ucagugcccguguccacccccu	25	38043179	38043240	-	0	25	0	10	No
bta-novel-miR183-3p	agaccccguggauuguagcccg	17	7204049	7204091	+	0	25	0	5	No
bta-novel-miR74-3p	uucucauuggccucacguccug	1	7155009	7155060	-	0	23	0	7	No
bta-novel-miR214-5p	agggagucccugguaguucagu	19	46101778	46101840	-	0	20	0	12	No
bta-novel-miR114-5p	uccauccccucuugcccaccagu	5	112488155	112488220	+	0	20	0	11	No
bta-novel-miR186-5p	ccucagccgcccccccucacaca	17	45189728	45189788	-	2	18	1	7	No
bta-novel-miR241-5p	uugcaugacucugagaguaag	23	32855275	32855331	+	0	18	0	10	No
bta-novel-miR277-5p	ucagcguugagucucccucc	29	50674547	50674604	+	0	16	0	7	No
bta-novel-miR93-1-5p	agauguuuucuccccugccagg	3	101036109	101036182	-	0	15	0	10	No
bta-novel-miR93-5p	agauguuuucuccccugccagg	3	101014679	101014752	-	0	15	0	10	No
bta-novel-miR245-5p	aaaauccgaacaaacuuuuugg	24	56911715	56911775	+	0	15	0	6	No
bta-novel-miR84-5p	cggaccgaguccccuuccccuc	2	22797965	22798031	-	0	15	0	5	No
bta-novel-miR160-5p	cuaucccuggcucccccguuuu	11	68587603	68587663	-	0	15	0	5	No
bta-novel-miR267-5p	ugggucgcgaccucucccuggua	28	5833249	5833308	+	4	14	2	8	No
bta-novel-miR257-5p	aaaaaacccgaauguaccuuuug	25	28487585	28487644	+	1	13	1	5	No
bta-novel-miR164-5p	uccgccuccuguccucugcccuca	11	104821565	104821626	-	0	13	0	7	No
bta-novel-miR109-5p	ccucauguggaaucuuuaguugu	5	100200427	100200494	+	0	12	0	10	No
bta-novel-miR92-5p	ccggccccgcgagcuccccgcga	3	78274097	78274166	+	0	10	0	4	No
bta-novel-miR41-1-5p	aaaaauccgaacgaacuuuuugg	21	57156230	57156288	-	5	8	3	4	No
bta-novel-miR205-5p	ucacagggcgcucucuuccagg	18	62946034	62946093	+	3	8	2	6	No
bta-novel-miR182-5p	aaaaaccugaaugaaccuuuu	17	6839872	6839930	+	0	8	0	6	No
bta-novel-miR268-5p	caggcgaucucccacuuccagg	28	24751593	24751663	+	0	8	0	6	No
bta-novel-miR219-5p	cuguguaaaccuugugcugugc	20	8589998	8590060	-	0	8	0	5	No
bta-novel-miR139-5p	aaacugggcugaacuuuuuggc	7	70741317	70741378	-	0	8	0	4	No
bta-novel-miR281-5p	ccccucugucuacuccaccaga	X	86904671	86904741	+	9	7	6	4	No
bta-novel-miR236-5p	aaaaacccaaacgaacuuuuug	23	3759404	3759463	+	0	6	0	6	No
bta-novel-miR170-3p	uggaccaccagggaaguuucu	13	52282717	52282787	-	0	6	0	4	No
bta-novel-miR77-5p	gaaaaccugaaugaccauuuug	1	84168592	84168651	+	0	6	0	3	No
bta-novel-miR33-5p	uucucagguuggacaguccuga	13	53904037	53904098	-	1	5	1	5	No
bta-novel-miR115-5p	aaaaucugaaugaacuuuuugg	5	114770052	114770110	-	0	5	0	3	No
bta-novel-miR185-3p	uaggcucuagagugugugg	17	45148645	45148706	-	0	4	0	4	No
bta-novel-miR81-5p	ucuccaugcuguuggcucugccugg	1	145938241	145938300	-	0	4	0	3	No
bta-novel-miR162-5p	aaaaacucaaaugaacuucuug	11	98471067	98471126	+	0	3	0	3	No
bta-novel-miR75-5p	cacgcuccccggcccucccggua	1	71355709	71355761	-	0	3	0	2	No
bta-novel-miR175-5p	uguucuguccgucccccuccagc	15	40435474	40435531	-	0	3	0	2	No
bta-novel-miR216-5p	ucacggccucucugcccccagg	19	55775764	55775831	+	0	3	0	2	No
bta-novel-miR237-3p	ggacguccagacucaacucu	23	7394816	7394880	-	0	3	0	2	No
bta-novel-miR166-5p	aaaaucugaaugaacuuuuagg	12	11774506	11774566	-	0	3	0	1	No
bta-novel-miR210-5p	agcugcuuccccugacacucagg	19	34963125	34963190	-	1	2	1	1	No
bta-novel-miR146-5p	acagaccuuccagccuuccagc	8	59896680	59896739	-	0	2	0	2	No
bta-novel-miR152-5p	cgcaggcggcgggagcgggacgg	10	53416763	53416828	-	0	2	0	2	No
bta-novel-miR177-3p	ccucuguucccucugcuccgua	15	74672982	74673045	+	0	2	0	2	No
bta-novel-miR125-5p	aaaaccugagugaacucuuugg	7	7138859	7138919	+	0	2	0	1	No
bta-novel-miR138-5p	uccuccuccucccgcacucgagc	7	44182776	44182840	-	0	2	0	1	No
bta-novel-miR161-5p	uccgccuugugcuuccugcaga	11	98464109	98464170	+	0	2	0	1	No
bta-novel-miR242-3p	ucucuaguucuugcacgcucu	23	36522866	36522913	-	0	2	0	1	No
bta-novel-miR258-5p	ugccagacggucucugcccugc	25	37293435	37293499	-	0	2	0	1	No
bta-novel-miR117-5p	uccgagcgccgacgcagcccagc	6	101908177	101908225	-	5	1	4	1	No
bta-novel-miR90-5p	uccuccucgucggccucuucagc	3	20301960	20302011	-	0	1	0	1	No
bta-novel-miR130-3p	cucaaccagacugauuuugc	7	13675758	13675818	-	0	1	0	1	No
bta-novel-miR153-5p	caccccagguuggaaagagcugg	10	79601368	79601428	-	0	1	0	1	No
bta-novel-miR159-5p	ugccucuccgccaccuccaccu	11	47993876	47993929	+	0	1	0	1	No
bta-novel-miR169-5p	ccagauccucuugcaucccccacc	12	86183679	86183738	-	0	1	0	1	No
bta-novel-miR178-5p	uaucuuccaguaaucucugagu	15	76484261	76484329	+	0	1	0	1	No
bta-novel-miR192-3p	aucccaccucugccaccaag	18	14096925	14096990	+	0	1	0	1	No
bta-novel-miR195-5p	uccguggucccccuucugcag	18	36462265	36462323	+	0	1	0	1	No
bta-novel-miR196-5p	ggccucccuguaaugcucugc	18	36681211	36681271	+	0	1	0	1	No
bta-novel-miR202-5p	ccaccgccugcccucaccugc	18	56570944	56571003	+	0	1	0	1	No
bta-novel-miR208-3p	gaaccguuaccauuacua	19	20238540	20238582	+	0	1	0	1	No
bta-novel-miR213-3p	uucccgccggcguaugcugcugu	19	43246184	43246258	-	0	1	0	1	No
bta-novel-miR213-1-3p	uucccgccggcguaugcugcugu	19	43283900	43283974	-	0	1	0	1	No
bta-novel-miR251-5p	ugacucaucccuccugcccucagg	25	3447709	3447773	-	0	1	0	1	No
bta-novel-miR256-5p	ucuccuggucucuucccucagu	25	26267368	26267440	-	0	1	0	1	No
bta-novel-miR265-3p	cccgguacugagcugacccga	27	36572784	36572848	+	0	1	0	1	No
bta-novel-miR275-3p	ucuucccacccagugcacccagc	29	43424127	43424183	+	0	1	0	1	No
bta-novel-miR220-3p	acacggacaggauugacaga	20	11050001	11050050	+	84	0	7	0	No
bta-novel-miR264-3p	ugcggcguggcgggcggcggcuccc	27	6223980	6224039	-	9	0	4	0	No
bta-novel-miR79-3p	cccgguggucuagugguuaggauuc	1	90369895	90369964	-	2	0	2	0	No
bta-novel-miR131-3p	ucccggguggucuaguggu	7	14499141	14499214	+	2	0	1	0	No

## Sheet: Table S3
Table S3. The differentially expressed transcripts
Transcript ID	Gene ID	Peptide ID	Gene name	Description	Chromosome	Strand	Start position	End position
ENSBTAT00000069362	ENSBTAG00000049916		ncRNAs	Metazoan signal recognition particle RNA	10	1	42629551	42629849
ENSBTAT00000069271	ENSBTAG00000021921	ENSBTAP00000071745	STRBP	spermatid perinuclear RNA binding protein	11	-1	94280014	94420605
ENSBTAT00000080234	ENSBTAG00000013843	ENSBTAP00000069292	ACVRL1	activin A receptor like type 1	5	-1	27943530	27957768
ENSBTAT00000073418	ENSBTAG00000017082	ENSBTAP00000071966	POR	cytochrome p450 oxidoreductase	25	1	34146939	34213388
ENSBTAT00000074027	ENSBTAG00000007620	ENSBTAP00000059408	INTS11	integrator complex subunit 11	16	1	51201649	51211966
ENSBTAT00000074342	ENSBTAG00000009109	ENSBTAP00000070669	CASD1	CAS1 domain containing 1	4	1	11886419	11939978
ENSBTAT00000024364	ENSBTAG00000018310	ENSBTAP00000024364	SETD3	SET domain containing 3, actin histidine methyltransferase	21	-1	64414349	64492753
ENSBTAT00000083540	ENSBTAG00000014515	ENSBTAP00000064074	RFC1	replication factor C subunit 1	6	-1	58431359	58492858
ENSBTAT00000086103	ENSBTAG00000017143	ENSBTAP00000062837	PDIA4	protein disulfide isomerase family A member 4	4	-1	112198601	112215554
ENSBTAT00000047480	ENSBTAG00000006970	ENSBTAP00000044686	OLA1	Obg like ATPase 1	2	1	22528224	22693132
ENSBTAT00000069723	ENSBTAG00000017830	ENSBTAP00000068222	RBMS2	RNA binding motif single stranded interacting protein 2	5	-1	56836859	56890516
ENSBTAT00000067487	ENSBTAG00000002676	ENSBTAP00000066834	SAE1	SUMO1 activating enzyme subunit 1	18	1	54170188	54232475
ENSBTAT00000067876	ENSBTAG00000011982	ENSBTAP00000068663	BATF3	basic leucine zipper ATF-like transcription factor 3	16	1	70845328	70859124
ENSBTAT00000043915	ENSBTAG00000015272	ENSBTAP00000041450	TSC22D4	TSC22 domain family member 4	25	1	36077727	36087711
ENSBTAT00000085141	ENSBTAG00000014685	ENSBTAP00000069089	HPRT1	hypoxanthine phosphoribosyltransferase 1	X	1	18176948	18208578
ENSBTAT00000068478	ENSBTAG00000030578	ENSBTAP00000058892	PTOV1	PTOV1 extended AT-hook containing adaptor protein	18	1	56202605	56210298
ENSBTAT00000075709	ENSBTAG00000021065	ENSBTAP00000057913	MFSD13A	major facilitator superfamily domain containing 13A	26	1	23071864	23089451
ENSBTAT00000066733	ENSBTAG00000017713	ENSBTAP00000061432	KTN1	kinectin 1	10	1	68006356	68118826
ENSBTAT00000070528	ENSBTAG00000012607	ENSBTAP00000069339	NCAPH2	non-SMC condensin II complex subunit H2	5	1	119812249	119822276
ENSBTAT00000079572	ENSBTAG00000013611	ENSBTAP00000058076	SCLT1	sodium channel and clathrin linker 1	17	1	28724059	28932798
ENSBTAT00000034825	ENSBTAG00000004196	ENSBTAP00000034709	FMNL1	formin like 1	19	1	44863248	44892548
ENSBTAT00000076818	ENSBTAG00000003652	ENSBTAP00000069982	TMEM128	transmembrane protein 128	6	1	104853328	104868645
ENSBTAT00000076256	ENSBTAG00000031388	ENSBTAP00000071942	DNAAF4	dynein axonemal assembly factor 4	10	1	54845673	54912940
ENSBTAT00000076008	ENSBTAG00000006347	ENSBTAP00000072405	UTP4	UTP4, small subunit processome component	18	1	36343222	36373620
ENSBTAT00000069531	ENSBTAG00000015669	ENSBTAP00000059598	ADAT1	adenosine deaminase tRNA specific 1	18	-1	2870001	2921632
ENSBTAT00000078707	ENSBTAG00000013244	ENSBTAP00000072990	HDAC6	histone deacetylase 6	X	1	86914646	86934091
ENSBTAT00000053474	ENSBTAG00000001877	ENSBTAP00000051689	HMGN5	high mobility group nucleosome binding domain 5	X	1	71422740	71432688
ENSBTAT00000021122	ENSBTAG00000015889	ENSBTAP00000021122	CLCN7	chloride voltage-gated channel 7	25	-1	1138152	1158761
ENSBTAT00000086656	ENSBTAG00000001132	ENSBTAP00000059681	GTDC1	glycosyltransferase like domain containing 1	2	1	52388547	52825730
ENSBTAT00000083079	ENSBTAG00000004427	ENSBTAP00000069547	OSBPL8	oxysterol binding protein like 8	5	-1	5839779	6001503
ENSBTAT00000069904	ENSBTAG00000014306	ENSBTAP00000064885	DOP1B	DOP1 leucine zipper like protein B	1	1	148516597	148594523
ENSBTAT00000048998	ENSBTAG00000003038	ENSBTAP00000045944	TAP2	transporter 2, ATP binding cassette subfamily B member	23	-1	7138546	7169274
ENSBTAT00000070366	ENSBTAG00000010467	ENSBTAP00000071865	SUPT5H	SPT5 homolog, DSIF elongation factor subunit	18	1	49132458	49159095
ENSBTAT00000073781	ENSBTAG00000021694	ENSBTAP00000065236	SPAST	spastin	11	1	14696392	14751826
ENSBTAT00000033913	ENSBTAG00000024449	ENSBTAP00000033816	CENPF	centromere protein F	16	-1	68929292	68991907
ENSBTAT00000001585	ENSBTAG00000001197	ENSBTAP00000001585	SLAMF7	SLAM family member 7	3	-1	8848948	8864962
ENSBTAT00000015995	ENSBTAG00000013093	ENSBTAP00000015995	ALDH3B1	aldehyde dehydrogenase 3 family member B1	29	1	45537447	45557692
ENSBTAT00000086508	ENSBTAG00000000492	ENSBTAP00000066324	ASNSD1	asparagine synthetase domain containing 1	2	-1	6665574	6676526
ENSBTAT00000085313	ENSBTAG00000020610	ENSBTAP00000069429	ANKZF1	ankyrin repeat and zinc finger domain containing 1	2	1	107179983	107186463
ENSBTAT00000021345	ENSBTAG00000016038	ENSBTAP00000021345	GCC2	GRIP and coiled-coil domain containing 2	11	-1	44805532	44840401
ENSBTAT00000013607	ENSBTAG00000010304	ENSBTAP00000013607	CHKA	choline kinase alpha	29	-1	45579775	45640374
ENSBTAT00000073123	ENSBTAG00000000094	ENSBTAP00000058697	ATPAF1	ATP synthase mitochondrial F1 complex assembly factor 1	3	1	99466613	99491947
ENSBTAT00000079799	ENSBTAG00000019197	ENSBTAP00000058205	TASOR2	transcription activation suppressor family member 2	13	-1	42953008	43022328
ENSBTAT00000071927	ENSBTAG00000016168	ENSBTAP00000067367	APLP2	amyloid beta precursor like protein 2	29	1	36262912	36325816
ENSBTAT00000071002	ENSBTAG00000016415	ENSBTAP00000065670	LTA4H	leukotriene A4 hydrolase	5	-1	60305573	60336225
ENSBTAT00000032902	ENSBTAG00000002261	ENSBTAP00000032830	LBX1	ladybird homeobox 1	26	-1	22026546	22029801
ENSBTAT00000061421	ENSBTAG00000019279	ENSBTAP00000053506	MLH3	mutL homolog 3	10	-1	86276261	86301871
ENSBTAT00000076263	ENSBTAG00000008409	ENSBTAP00000073996	MYC	MYC proto-oncogene, bHLH transcription factor	14	-1	12653173	12658366
ENSBTAT00000072877	ENSBTAG00000018946	ENSBTAP00000070081	FAM129C	family with sequence similarity 129 member C	7	-1	5568730	5586773
ENSBTAT00000079143	ENSBTAG00000044135	ENSBTAP00000064568	PIGO	phosphatidylinositol glycan anchor biosynthesis class O	8	-1	59345169	59351847
ENSBTAT00000054068	ENSBTAG00000000845	ENSBTAP00000050727	OLFM3	olfactomedin 3	3	1	41271697	41494156
ENSBTAT00000072544	ENSBTAG00000015663	ENSBTAP00000069943	STIP1	stress induced phosphoprotein 1	29	1	42496143	42508869
ENSBTAT00000076133	ENSBTAG00000054123	ENSBTAP00000056829		potassium voltage-gated channel subfamily C member 2	5	-1	4492053	4505960
ENSBTAT00000022991	ENSBTAG00000017294	ENSBTAP00000022991	ORM1	orosomucoid 1	8	1	103550934	103555915
ENSBTAT00000002751	ENSBTAG00000002129	ENSBTAP00000002751	KLF5	Kruppel like factor 5	12	1	47799472	47818754
ENSBTAT00000074247	ENSBTAG00000013588	ENSBTAP00000059476	ZNF532	zinc finger protein 532	24	1	57933911	58044908
ENSBTAT00000019214	ENSBTAG00000014449	ENSBTAP00000019214			1	1	83419537	83420366
ENSBTAT00000028059	ENSBTAG00000021071	ENSBTAP00000028059	TRIM8	tripartite motif containing 8	26	1	23265725	23279452
ENSBTAT00000075085	ENSBTAG00000000149	ENSBTAP00000073638	USP40	ubiquitin specific peptidase 40	3	-1	113167613	113257470
ENSBTAT00000028426	ENSBTAG00000021322	ENSBTAP00000028426	TM4SF20	transmembrane 4 L six family member 20	2	-1	115519318	115530237
ENSBTAT00000053883	ENSBTAG00000027204	ENSBTAP00000049298		T-cell receptor beta-1 chain C region	4	1	106102213	106107665
ENSBTAT00000013838	ENSBTAG00000010475	ENSBTAP00000013838	MLNR	motilin receptor	12	1	18857662	18859717
ENSBTAT00000061860	ENSBTAG00000044427		RF00009	ribonuclease P RNA component H1	10	1	26778581	26778913
ENSBTAT00000059450	ENSBTAG00000042458		RF00030	RNA component of mitochondrial RNA processing endoribonuclease	8	-1	59833118	59833395

## Sheet: Table S4
Table S4. A summary of GOs in biological process for the 43 abundantly expressed transcripts in seropositive group									5724
GO level	GO ID	GO Name	Parents (ACC)	Parents (Name)	Nodescore	Number of transcripts	Transcript ID
1	GO:0008150	biological_process			6.39	28	ENSBTAT00000022991, ENSBTAT00000076256, ENSBTAT00000053474, ENSBTAT00000043915, ENSBTAT00000076133, ENSBTAT00000079572, ENSBTAT00000080234, ENSBTAT00000085141, ENSBTAT00000067876, ENSBTAT00000069271, ENSBTAT00000013838, ENSBTAT00000083540, ENSBTAT00000069531, ENSBTAT00000024364, ENSBTAT00000074027, ENSBTAT00000019214, ENSBTAT00000074342, ENSBTAT00000002751, ENSBTAT00000076263, ENSBTAT00000079143,…
2	GO:0002376	immune system process	GO:0008150	biological_process	0.96	2	ENSBTAT00000022991, ENSBTAT00000028059
2	GO:0000003	reproduction	GO:0008150	biological_process	0.22	1	ENSBTAT00000069271
2	GO:0040011	locomotion	GO:0008150	biological_process	0.36	1	ENSBTAT00000028059
2	GO:0051704	multi-organism process	GO:0008150	biological_process	0.77	2	ENSBTAT00000028059, ENSBTAT00000069271
2	GO:0065007	biological regulation	GO:0008150	biological_process	2.38	12	ENSBTAT00000022991, ENSBTAT00000002751, ENSBTAT00000076263, ENSBTAT00000043915, ENSBTAT00000080234, ENSBTAT00000028059, ENSBTAT00000034825, ENSBTAT00000067876, ENSBTAT00000068478, ENSBTAT00000013838, ENSBTAT00000086103, ENSBTAT00000032902
2	GO:0048518	positive regulation of biological process	GO:0008150, GO:0050789	biological_process, regulation of biological process	1.06	2	ENSBTAT00000028059, ENSBTAT00000068478
2	GO:0023052	signaling	GO:0008150	biological_process	0.62	3	ENSBTAT00000080234, ENSBTAT00000028059, ENSBTAT00000013838
2	GO:0032502	developmental process	GO:0008150	biological_process	0.93	4	ENSBTAT00000079572, ENSBTAT00000034825, ENSBTAT00000028059, ENSBTAT00000069271
2	GO:0009987	cellular process	GO:0008150	biological_process	5.22	23	ENSBTAT00000069531, ENSBTAT00000074027, ENSBTAT00000024364, ENSBTAT00000019214, ENSBTAT00000076256, ENSBTAT00000002751, ENSBTAT00000053474, ENSBTAT00000076263, ENSBTAT00000043915, ENSBTAT00000079143, ENSBTAT00000079572, ENSBTAT00000080234, ENSBTAT00000066733, ENSBTAT00000028059, ENSBTAT00000034825, ENSBTAT00000085141, ENSBTAT00000067876, ENSBTAT00000070528, ENSBTAT00000068478, ENSBTAT00000013838,…
2	GO:0051179	localization	GO:0008150	biological_process	0.34	2	ENSBTAT00000028059, ENSBTAT00000076133
2	GO:0071840	cellular component organization or biogenesis	GO:0008150	biological_process	1	5	ENSBTAT00000079572, ENSBTAT00000024364, ENSBTAT00000034825, ENSBTAT00000070528, ENSBTAT00000053474
2	GO:0050896	response to stimulus	GO:0008150	biological_process	0.91	4	ENSBTAT00000080234, ENSBTAT00000028059, ENSBTAT00000013838, ENSBTAT00000083540
2	GO:0022414	reproductive process	GO:0000003, GO:0008150	reproduction, biological_process	0.36	1	ENSBTAT00000069271
2	GO:0050789	regulation of biological process	GO:0008150, GO:0065007	biological_process, biological regulation	3.5	12	ENSBTAT00000022991, ENSBTAT00000002751, ENSBTAT00000076263, ENSBTAT00000043915, ENSBTAT00000080234, ENSBTAT00000028059, ENSBTAT00000067876, ENSBTAT00000034825, ENSBTAT00000068478, ENSBTAT00000013838, ENSBTAT00000086103, ENSBTAT00000032902
2	GO:0032501	multicellular organismal process	GO:0008150	biological_process	0.68	3	ENSBTAT00000079572, ENSBTAT00000028059, ENSBTAT00000069271
2	GO:0008152	metabolic process	GO:0008150	biological_process	3.32	17	ENSBTAT00000069531, ENSBTAT00000074027, ENSBTAT00000024364, ENSBTAT00000019214, ENSBTAT00000074342, ENSBTAT00000002751, ENSBTAT00000076263, ENSBTAT00000043915, ENSBTAT00000079143, ENSBTAT00000080234, ENSBTAT00000028059, ENSBTAT00000085141, ENSBTAT00000067876, ENSBTAT00000073418, ENSBTAT00000068478, ENSBTAT00000083540, ENSBTAT00000032902
2	GO:0048519	negative regulation of biological process	GO:0008150, GO:0050789	biological_process, regulation of biological process	0.71	1	ENSBTAT00000028059
3	GO:0043901	negative regulation of multi-organism process	GO:0048519, GO:0043900, GO:0051704	negative regulation of biological process, regulation of multi-organism process, multi-organism process	0.79	1	ENSBTAT00000028059
3	GO:0019725	cellular homeostasis	GO:0009987, GO:0042592	cellular process, homeostatic process	0.6	1	ENSBTAT00000086103
3	GO:0048609	multicellular organismal reproductive process	GO:0022414, GO:0032504	reproductive process, multicellular organism reproduction	0.22	1	ENSBTAT00000069271
3	GO:0043900	regulation of multi-organism process	GO:0050789, GO:0051704	regulation of biological process, multi-organism process	0.48	1	ENSBTAT00000028059
3	GO:0055114	oxidation-reduction process	GO:0008152	metabolic process	1	1	ENSBTAT00000073418
3	GO:0050794	regulation of cellular process	GO:0009987, GO:0050789	cellular process, regulation of biological process	2.7	11	ENSBTAT00000080234, ENSBTAT00000028059, ENSBTAT00000034825, ENSBTAT00000067876, ENSBTAT00000002751, ENSBTAT00000068478, ENSBTAT00000013838, ENSBTAT00000076263, ENSBTAT00000086103, ENSBTAT00000043915, ENSBTAT00000032902
3	GO:0061919	process utilizing autophagic mechanism	GO:0009987	cellular process	0.36	1	ENSBTAT00000028059
3	GO:0003006	developmental process involved in reproduction	GO:0022414, GO:0032502	reproductive process, developmental process	0.6	1	ENSBTAT00000069271
3	GO:0009893	positive regulation of metabolic process	GO:0019222, GO:0048518, GO:0008152	regulation of metabolic process, positive regulation of biological process, metabolic process	0.35	2	ENSBTAT00000028059, ENSBTAT00000068478
3	GO:0007275	multicellular organism development	GO:0032501, GO:0048856	multicellular organismal process, anatomical structure development	0.01	1	ENSBTAT00000079572
3	GO:0009605	response to external stimulus	GO:0050896	response to stimulus	0.13	1	ENSBTAT00000028059
3	GO:0051707	response to other organism	GO:0043207, GO:0051704	response to external biotic stimulus, multi-organism process	0.36	1	ENSBTAT00000028059
3	GO:0007154	cell communication	GO:0009987	cellular process	0.62	3	ENSBTAT00000080234, ENSBTAT00000028059, ENSBTAT00000013838
3	GO:0048583	regulation of response to stimulus	GO:0050896, GO:0050789	response to stimulus, regulation of biological process	0.13	1	ENSBTAT00000028059
3	GO:0009607	response to biotic stimulus	GO:0050896	response to stimulus	0.13	1	ENSBTAT00000028059
3	GO:0044419	interspecies interaction between organisms	GO:0051704	multi-organism process	0.34	1	ENSBTAT00000028059
3	GO:0019222	regulation of metabolic process	GO:0008152, GO:0050789	metabolic process, regulation of biological process	2.03	7	ENSBTAT00000028059, ENSBTAT00000067876, ENSBTAT00000002751, ENSBTAT00000068478, ENSBTAT00000076263, ENSBTAT00000043915, ENSBTAT00000032902
3	GO:0071704	organic substance metabolic process	GO:0008152	metabolic process	3.12	16	ENSBTAT00000069531, ENSBTAT00000074027, ENSBTAT00000024364, ENSBTAT00000019214, ENSBTAT00000074342, ENSBTAT00000002751, ENSBTAT00000076263, ENSBTAT00000043915, ENSBTAT00000079143, ENSBTAT00000080234, ENSBTAT00000085141, ENSBTAT00000028059, ENSBTAT00000067876, ENSBTAT00000068478, ENSBTAT00000083540, ENSBTAT00000032902
3	GO:0032504	multicellular organism reproduction	GO:0000003, GO:0032501	reproduction, multicellular organismal process	0.13	1	ENSBTAT00000069271
3	GO:0044703	multi-organism reproductive process	GO:0022414, GO:0051704	reproductive process, multi-organism process	0.13	1	ENSBTAT00000069271
3	GO:0021700	developmental maturation	GO:0032502	developmental process	0.13	1	ENSBTAT00000079572
3	GO:0051716	cellular response to stimulus	GO:0009987, GO:0050896	cellular process, response to stimulus	0.84	4	ENSBTAT00000080234, ENSBTAT00000028059, ENSBTAT00000013838, ENSBTAT00000083540
3	GO:0048856	anatomical structure development	GO:0032502	developmental process	0.26	2	ENSBTAT00000079572, ENSBTAT00000034825
3	GO:0050793	regulation of developmental process	GO:0032502, GO:0050789	developmental process, regulation of biological process	0.22	1	ENSBTAT00000034825
3	GO:0033036	macromolecule localization	GO:0051179	localization	0.13	1	ENSBTAT00000028059
3	GO:0052192	movement in environment of other organism involved in symbiotic interaction	GO:0044419, GO:0040011	interspecies interaction between organisms, locomotion	0.08	1	ENSBTAT00000028059
3	GO:0006955	immune response	GO:0050896, GO:0002376	response to stimulus, immune system process	0.6	1	ENSBTAT00000028059
3	GO:0040012	regulation of locomotion	GO:0040011, GO:0050789	locomotion, regulation of biological process	0.36	1	ENSBTAT00000028059
3	GO:0006928	movement of cell or subcellular component	GO:0009987	cellular process	1.56	2	ENSBTAT00000066733, ENSBTAT00000076256
3	GO:0040013	negative regulation of locomotion	GO:0048519, GO:0040011, GO:0040012	negative regulation of biological process, locomotion, regulation of locomotion	0.6	1	ENSBTAT00000028059
3	GO:0019827	stem cell population maintenance	GO:0032501, GO:0098727	multicellular organismal process, maintenance of cell number	1	1	ENSBTAT00000028059
3	GO:0098727	maintenance of cell number	GO:0032502	developmental process	0.6	1	ENSBTAT00000028059
3	GO:0051091	positive regulation of DNA-binding transcription factor activity	GO:0044093, GO:0048518, GO:0051090	positive regulation of molecular function, positive regulation of biological process, regulation of DNA-binding transcription factor activity	0.6	1	ENSBTAT00000028059
3	GO:0006950	response to stress	GO:0050896	response to stimulus	0.43	2	ENSBTAT00000028059, ENSBTAT00000083540
3	GO:0009058	biosynthetic process	GO:0008152	metabolic process	1.81	11	ENSBTAT00000079143, ENSBTAT00000019214, ENSBTAT00000028059, ENSBTAT00000067876, ENSBTAT00000085141, ENSBTAT00000002751, ENSBTAT00000068478, ENSBTAT00000076263, ENSBTAT00000043915, ENSBTAT00000083540, ENSBTAT00000032902
3	GO:0065008	regulation of biological quality	GO:0065007	biological regulation	0.82	2	ENSBTAT00000034825, ENSBTAT00000086103
3	GO:0051641	cellular localization	GO:0051179	localization	0.13	1	ENSBTAT00000028059
3	GO:0048869	cellular developmental process	GO:0032502, GO:0009987	developmental process, cellular process	0.26	2	ENSBTAT00000079572, ENSBTAT00000034825
3	GO:0007165	signal transduction	GO:0023052, GO:0050794, GO:0051716, GO:0009987, GO:0007154	signaling, regulation of cellular process, cellular response to stimulus, cellular process, cell communication	1.03	3	ENSBTAT00000080234, ENSBTAT00000028059, ENSBTAT00000013838
3	GO:0023056	positive regulation of signaling	GO:0023051, GO:0023052, GO:0048518	regulation of signaling, signaling, positive regulation of biological process	0.22	1	ENSBTAT00000028059
3	GO:0016043	cellular component organization	GO:0071840, GO:0009987	cellular component organization or biogenesis, cellular process	1.67	5	ENSBTAT00000079572, ENSBTAT00000024364, ENSBTAT00000034825, ENSBTAT00000070528, ENSBTAT00000053474
3	GO:0032879	regulation of localization	GO:0050789, GO:0051179	regulation of biological process, localization	0.13	1	ENSBTAT00000028059
3	GO:0051234	establishment of localization	GO:0051179	localization	0.44	1	ENSBTAT00000076133
3	GO:0048522	positive regulation of cellular process	GO:0050794, GO:0009987, GO:0048518	regulation of cellular process, cellular process, positive regulation of biological process	0.39	2	ENSBTAT00000028059, ENSBTAT00000068478
3	GO:0002682	regulation of immune system process	GO:0050789, GO:0002376	regulation of biological process, immune system process	1	1	ENSBTAT00000022991
3	GO:0065009	regulation of molecular function	GO:0065007	biological regulation	0.22	1	ENSBTAT00000028059
3	GO:0019953	sexual reproduction	GO:0000003, GO:0044703	reproduction, multi-organism reproductive process	0.22	1	ENSBTAT00000069271
3	GO:0006807	nitrogen compound metabolic process	GO:0008152	metabolic process	1.12	15	ENSBTAT00000069531, ENSBTAT00000074027, ENSBTAT00000024364, ENSBTAT00000019214, ENSBTAT00000002751, ENSBTAT00000076263, ENSBTAT00000043915, ENSBTAT00000079143, ENSBTAT00000080234, ENSBTAT00000028059, ENSBTAT00000067876, ENSBTAT00000085141, ENSBTAT00000068478, ENSBTAT00000083540, ENSBTAT00000032902
3	GO:0044238	primary metabolic process	GO:0008152	metabolic process	2.14	16	ENSBTAT00000069531, ENSBTAT00000074027, ENSBTAT00000024364, ENSBTAT00000019214, ENSBTAT00000074342, ENSBTAT00000002751, ENSBTAT00000076263, ENSBTAT00000043915, ENSBTAT00000079143, ENSBTAT00000080234, ENSBTAT00000028059, ENSBTAT00000067876, ENSBTAT00000085141, ENSBTAT00000068478, ENSBTAT00000083540, ENSBTAT00000032902
3	GO:0044237	cellular metabolic process	GO:0009987, GO:0008152	cellular process, metabolic process	2.82	15	ENSBTAT00000069531, ENSBTAT00000074027, ENSBTAT00000024364, ENSBTAT00000019214, ENSBTAT00000002751, ENSBTAT00000076263, ENSBTAT00000043915, ENSBTAT00000079143, ENSBTAT00000080234, ENSBTAT00000028059, ENSBTAT00000085141, ENSBTAT00000067876, ENSBTAT00000068478, ENSBTAT00000083540, ENSBTAT00000032902
3	GO:0007017	microtubule-based process	GO:0009987	cellular process	1.56	2	ENSBTAT00000066733, ENSBTAT00000076256
3	GO:0023051	regulation of signaling	GO:0023052, GO:0050789	signaling, regulation of biological process	0.13	1	ENSBTAT00000028059
3	GO:0048584	positive regulation of response to stimulus	GO:0050896, GO:0048518, GO:0048583	response to stimulus, positive regulation of biological process, regulation of response to stimulus	0.22	1	ENSBTAT00000028059
3	GO:0030029	actin filament-based process	GO:0009987	cellular process	1.56	2	ENSBTAT00000024364, ENSBTAT00000034825
3	GO:1903829	positive regulation of cellular protein localization	GO:0034613, GO:1903827, GO:0048518	cellular protein localization, regulation of cellular protein localization, positive regulation of biological process	0.6	1	ENSBTAT00000028059
3	GO:0044281	small molecule metabolic process	GO:0008152	metabolic process	0.08	1	ENSBTAT00000085141
3	GO:0009056	catabolic process	GO:0008152	metabolic process	0.22	1	ENSBTAT00000028059
3	GO:0009653	anatomical structure morphogenesis	GO:0032502, GO:0048856	developmental process, anatomical structure development	0.22	1	ENSBTAT00000034825
4	GO:0006793	phosphorus metabolic process	GO:0044237	cellular metabolic process	0.26	2	ENSBTAT00000079143, ENSBTAT00000080234
4	GO:1901576	organic substance biosynthetic process	GO:0009058, GO:0071704	biosynthetic process, organic substance metabolic process	1.95	11	ENSBTAT00000079143, ENSBTAT00000019214, ENSBTAT00000085141, ENSBTAT00000028059, ENSBTAT00000067876, ENSBTAT00000002751, ENSBTAT00000068478, ENSBTAT00000076263, ENSBTAT00000043915, ENSBTAT00000083540, ENSBTAT00000032902
4	GO:0043170	macromolecule metabolic process	GO:0071704	organic substance metabolic process	3.93	14	ENSBTAT00000069531, ENSBTAT00000074027, ENSBTAT00000024364, ENSBTAT00000019214, ENSBTAT00000002751, ENSBTAT00000076263, ENSBTAT00000043915, ENSBTAT00000079143, ENSBTAT00000080234, ENSBTAT00000028059, ENSBTAT00000067876, ENSBTAT00000068478, ENSBTAT00000083540, ENSBTAT00000032902
4	GO:0043094	cellular metabolic compound salvage	GO:0044237	cellular metabolic process	0.36	1	ENSBTAT00000085141
4	GO:0033554	cellular response to stress	GO:0051716, GO:0006950	cellular response to stimulus, response to stress	0.36	1	ENSBTAT00000083540
4	GO:0051090	regulation of DNA-binding transcription factor activity	GO:0006355, GO:0065009	regulation of transcription, DNA-templated, regulation of molecular function	0.36	1	ENSBTAT00000028059
4	GO:1902186	regulation of viral release from host cell	GO:1903900, GO:0019076, GO:0040012	regulation of viral life cycle, viral release from host cell, regulation of locomotion	0.6	1	ENSBTAT00000028059
4	GO:1901135	carbohydrate derivative metabolic process	GO:0071704	organic substance metabolic process	0.29	2	ENSBTAT00000079143, ENSBTAT00000085141
4	GO:0009896	positive regulation of catabolic process	GO:0009056, GO:0009894, GO:0009893	catabolic process, regulation of catabolic process, positive regulation of metabolic process	0.36	1	ENSBTAT00000028059
4	GO:0008360	regulation of cell shape	GO:0022604, GO:0065008	regulation of cell morphogenesis, regulation of biological quality	1	1	ENSBTAT00000034825
4	GO:1901564	organonitrogen compound metabolic process	GO:0071704, GO:0006807	organic substance metabolic process, nitrogen compound metabolic process	0.73	5	ENSBTAT00000079143, ENSBTAT00000080234, ENSBTAT00000024364, ENSBTAT00000019214, ENSBTAT00000085141
4	GO:0006810	transport	GO:0051234	establishment of localization	0.73	1	ENSBTAT00000076133
4	GO:0044249	cellular biosynthetic process	GO:0009058, GO:0044237	biosynthetic process, cellular metabolic process	3.01	11	ENSBTAT00000079143, ENSBTAT00000019214, ENSBTAT00000085141, ENSBTAT00000028059, ENSBTAT00000067876, ENSBTAT00000002751, ENSBTAT00000068478, ENSBTAT00000076263, ENSBTAT00000043915, ENSBTAT00000083540, ENSBTAT00000032902
4	GO:0044403	symbiotic process	GO:0044419	interspecies interaction between organisms	0.56	1	ENSBTAT00000028059
4	GO:0007018	microtubule-based movement	GO:0006928, GO:0007017	movement of cell or subcellular component, microtubule-based process	2.6	2	ENSBTAT00000066733, ENSBTAT00000076256
4	GO:0044248	cellular catabolic process	GO:0009056, GO:0044237	catabolic process, cellular metabolic process	0.36	1	ENSBTAT00000028059
4	GO:0009967	positive regulation of signal transduction	GO:0009966, GO:0048584, GO:0010647, GO:0007165, GO:0023056	regulation of signal transduction, positive regulation of response to stimulus, positive regulation of cell communication, signal transduction, positive regulation of signaling	0.36	1	ENSBTAT00000028059
4	GO:0007166	cell surface receptor signaling pathway	GO:0007165	signal transduction	0.36	1	ENSBTAT00000080234
4	GO:0022603	regulation of anatomical structure morphogenesis	GO:0050793, GO:0009653	regulation of developmental process, anatomical structure morphogenesis	0.36	1	ENSBTAT00000034825
4	GO:0051092	positive regulation of NF-kappaB transcription factor activity	GO:0051091	positive regulation of DNA-binding transcription factor activity	1	1	ENSBTAT00000028059
4	GO:0005975	carbohydrate metabolic process	GO:0044238, GO:0071704	primary metabolic process, organic substance metabolic process	1	1	ENSBTAT00000074342
4	GO:0034641	cellular nitrogen compound metabolic process	GO:0006807, GO:0044237	nitrogen compound metabolic process, cellular metabolic process	1.12	12	ENSBTAT00000069531, ENSBTAT00000074027, ENSBTAT00000019214, ENSBTAT00000002751, ENSBTAT00000076263, ENSBTAT00000043915, ENSBTAT00000028059, ENSBTAT00000067876, ENSBTAT00000085141, ENSBTAT00000068478, ENSBTAT00000083540, ENSBTAT00000032902
4	GO:0071695	anatomical structure maturation	GO:0021700, GO:0048856	developmental maturation, anatomical structure development	0.22	1	ENSBTAT00000079572
4	GO:0043903	regulation of symbiosis, encompassing mutualism through parasitism	GO:0044403, GO:0043900	symbiotic process, regulation of multi-organism process	0.48	1	ENSBTAT00000028059
4	GO:0019538	protein metabolic process	GO:0043170, GO:0044238, GO:1901564	macromolecule metabolic process, primary metabolic process, organonitrogen compound metabolic process	0.92	4	ENSBTAT00000079143, ENSBTAT00000080234, ENSBTAT00000024364, ENSBTAT00000019214
4	GO:0043207	response to external biotic stimulus	GO:0009605, GO:0009607	response to external stimulus, response to biotic stimulus	0.22	1	ENSBTAT00000028059
4	GO:0006952	defense response	GO:0006950	response to stress	0.36	1	ENSBTAT00000028059
4	GO:0051171	regulation of nitrogen compound metabolic process	GO:0019222, GO:0006807	regulation of metabolic process, nitrogen compound metabolic process	0.68	7	ENSBTAT00000028059, ENSBTAT00000067876, ENSBTAT00000002751, ENSBTAT00000068478, ENSBTAT00000076263, ENSBTAT00000043915, ENSBTAT00000032902
4	GO:0044260	cellular macromolecule metabolic process	GO:0043170, GO:0044237	macromolecule metabolic process, cellular metabolic process	3.59	12	ENSBTAT00000024364, ENSBTAT00000019214, ENSBTAT00000002751, ENSBTAT00000076263, ENSBTAT00000043915, ENSBTAT00000079143, ENSBTAT00000080234, ENSBTAT00000028059, ENSBTAT00000067876, ENSBTAT00000068478, ENSBTAT00000083540, ENSBTAT00000032902
4	GO:0006725	cellular aromatic compound metabolic process	GO:0044237	cellular metabolic process	0.99	11	ENSBTAT00000069531, ENSBTAT00000074027, ENSBTAT00000085141, ENSBTAT00000028059, ENSBTAT00000067876, ENSBTAT00000002751, ENSBTAT00000068478, ENSBTAT00000076263, ENSBTAT00000043915, ENSBTAT00000083540, ENSBTAT00000032902
4	GO:0032880	regulation of protein localization	GO:0032879, GO:0008104	regulation of localization, protein localization	0.22	1	ENSBTAT00000028059
4	GO:0009966	regulation of signal transduction	GO:0023051, GO:0010646, GO:0007165, GO:0048583	regulation of signaling, regulation of cell communication, signal transduction, regulation of response to stimulus	0.22	1	ENSBTAT00000028059
4	GO:0007276	gamete generation	GO:0019953, GO:0048609	sexual reproduction, multicellular organismal reproductive process	0.36	1	ENSBTAT00000069271
4	GO:0048469	cell maturation	GO:0048468, GO:0048869, GO:0021700	cell development, cellular developmental process, developmental maturation	0.22	1	ENSBTAT00000079572
4	GO:0051173	positive regulation of nitrogen compound metabolic process	GO:0006807, GO:0051171, GO:0009893	nitrogen compound metabolic process, regulation of nitrogen compound metabolic process, positive regulation of metabolic process	0.05	1	ENSBTAT00000068478
4	GO:0030036	actin cytoskeleton organization	GO:0007010, GO:0030029	cytoskeleton organization, actin filament-based process	2.6	2	ENSBTAT00000024364, ENSBTAT00000034825
4	GO:0009889	regulation of biosynthetic process	GO:0019222, GO:0009058	regulation of metabolic process, biosynthetic process	1.9	7	ENSBTAT00000028059, ENSBTAT00000067876, ENSBTAT00000002751, ENSBTAT00000068478, ENSBTAT00000076263, ENSBTAT00000043915, ENSBTAT00000032902
4	GO:0045454	cell redox homeostasis	GO:0050794, GO:0019725	regulation of cellular process, cellular homeostasis	1	1	ENSBTAT00000086103
4	GO:0060255	regulation of macromolecule metabolic process	GO:0019222, GO:0043170	regulation of metabolic process, macromolecule metabolic process	3.16	7	ENSBTAT00000028059, ENSBTAT00000067876, ENSBTAT00000002751, ENSBTAT00000068478, ENSBTAT00000076263, ENSBTAT00000043915, ENSBTAT00000032902
4	GO:0006325	chromatin organization	GO:0016043, GO:0051276	cellular component organization, chromosome organization	1	1	ENSBTAT00000053474
4	GO:0098542	defense response to other organism	GO:0051707, GO:0006952	response to other organism, defense response	0.6	1	ENSBTAT00000028059
4	GO:0032989	cellular component morphogenesis	GO:0016043, GO:0048869, GO:0009653	cellular component organization, cellular developmental process, anatomical structure morphogenesis	0.22	1	ENSBTAT00000034825
4	GO:0080090	regulation of primary metabolic process	GO:0019222, GO:0044238	regulation of metabolic process, primary metabolic process	0.68	7	ENSBTAT00000028059, ENSBTAT00000067876, ENSBTAT00000002751, ENSBTAT00000068478, ENSBTAT00000076263, ENSBTAT00000043915, ENSBTAT00000032902
4	GO:0009891	positive regulation of biosynthetic process	GO:0009058, GO:0009889, GO:0009893	biosynthetic process, regulation of biosynthetic process, positive regulation of metabolic process	0.08	1	ENSBTAT00000068478
4	GO:0044093	positive regulation of molecular function	GO:0065009	regulation of molecular function	0.36	1	ENSBTAT00000028059
4	GO:0051128	regulation of cellular component organization	GO:0016043, GO:0050794	cellular component organization, regulation of cellular process	0.36	1	ENSBTAT00000034825
4	GO:1900182	positive regulation of protein localization to nucleus	GO:1900180, GO:1903829, GO:0034504	regulation of protein localization to nucleus, positive regulation of cellular protein localization, protein localization to nucleus	1	1	ENSBTAT00000028059
4	GO:0019637	organophosphate metabolic process	GO:0071704, GO:0006793	organic substance metabolic process, phosphorus metabolic process	0.08	1	ENSBTAT00000079143
4	GO:0061024	membrane organization	GO:0016043	cellular component organization	0.36	1	ENSBTAT00000079572
4	GO:1902187	negative regulation of viral release from host cell	GO:0019076, GO:1903901, GO:0040013, GO:1902186	viral release from host cell, negative regulation of viral life cycle, negative regulation of locomotion, regulation of viral release from host cell	1	1	ENSBTAT00000028059
4	GO:0031323	regulation of cellular metabolic process	GO:0019222, GO:0050794, GO:0044237	regulation of metabolic process, regulation of cellular process, cellular metabolic process	2.11	7	ENSBTAT00000028059, ENSBTAT00000067876, ENSBTAT00000002751, ENSBTAT00000068478, ENSBTAT00000076263, ENSBTAT00000043915, ENSBTAT00000032902
4	GO:0006139	nucleobase-containing compound metabolic process	GO:0006725, GO:0044238, GO:0034641, GO:1901360, GO:0046483	cellular aromatic compound metabolic process, primary metabolic process, cellular nitrogen compound metabolic process, organic cyclic compound metabolic process, heterocycle metabolic process	1.64	11	ENSBTAT00000069531, ENSBTAT00000074027, ENSBTAT00000085141, ENSBTAT00000028059, ENSBTAT00000067876, ENSBTAT00000002751, ENSBTAT00000068478, ENSBTAT00000076263, ENSBTAT00000043915, ENSBTAT00000083540, ENSBTAT00000032902
4	GO:0030154	cell differentiation	GO:0048869	cellular developmental process	0.08	1	ENSBTAT00000079572
4	GO:0008104	protein localization	GO:0033036	macromolecule localization	0.22	1	ENSBTAT00000028059
4	GO:0048468	cell development	GO:0030154, GO:0048869, GO:0048856	cell differentiation, cellular developmental process, anatomical structure development	0.13	1	ENSBTAT00000079572
4	GO:0044283	small molecule biosynthetic process	GO:0009058, GO:0044281	biosynthetic process, small molecule metabolic process	0.13	1	ENSBTAT00000085141
4	GO:0048525	negative regulation of viral process	GO:0050792, GO:0043901, GO:0016032	regulation of viral process, negative regulation of multi-organism process, viral process	1.32	1	ENSBTAT00000028059
4	GO:0046483	heterocycle metabolic process	GO:0044237	cellular metabolic process	0.99	11	ENSBTAT00000069531, ENSBTAT00000074027, ENSBTAT00000085141, ENSBTAT00000028059, ENSBTAT00000067876, ENSBTAT00000002751, ENSBTAT00000068478, ENSBTAT00000076263, ENSBTAT00000043915, ENSBTAT00000083540, ENSBTAT00000032902
4	GO:0031325	positive regulation of cellular metabolic process	GO:0031323, GO:0044237, GO:0048522, GO:0009893	regulation of cellular metabolic process, cellular metabolic process, positive regulation of cellular process, positive regulation of metabolic process	0.44	2	ENSBTAT00000028059, ENSBTAT00000068478
4	GO:0010646	regulation of cell communication	GO:0050794, GO:0007154	regulation of cellular process, cell communication	0.13	1	ENSBTAT00000028059
4	GO:0055086	nucleobase-containing small molecule metabolic process	GO:0044281, GO:0006139	small molecule metabolic process, nucleobase-containing compound metabolic process	0.13	1	ENSBTAT00000085141
4	GO:0010647	positive regulation of cell communication	GO:0010646, GO:0007154, GO:0048522	regulation of cell communication, cell communication, positive regulation of cellular process	0.22	1	ENSBTAT00000028059
4	GO:0044255	cellular lipid metabolic process	GO:0006629, GO:0044237	lipid metabolic process, cellular metabolic process	0.13	1	ENSBTAT00000079143
4	GO:0048731	system development	GO:0007275, GO:0048856	multicellular organism development, anatomical structure development	0.02	1	ENSBTAT00000079572
4	GO:0006996	organelle organization	GO:0016043	cellular component organization	1.43	4	ENSBTAT00000024364, ENSBTAT00000034825, ENSBTAT00000070528, ENSBTAT00000053474
4	GO:0006914	autophagy	GO:0061919, GO:0044248	process utilizing autophagic mechanism, cellular catabolic process	0.6	1	ENSBTAT00000028059
4	GO:0007186	G protein-coupled receptor signaling pathway	GO:0007165	signal transduction	1	1	ENSBTAT00000013838
4	GO:0035556	intracellular signal transduction	GO:0007165	signal transduction	0.36	1	ENSBTAT00000028059
4	GO:0052126	movement in host environment	GO:0051701, GO:0052192	interaction with host, movement in environment of other organism involved in symbiotic interaction	0.13	1	ENSBTAT00000028059
4	GO:0070727	cellular macromolecule localization	GO:0051641, GO:0033036	cellular localization, macromolecule localization	0.22	1	ENSBTAT00000028059
4	GO:0045087	innate immune response	GO:0006955, GO:0098542	immune response, defense response to other organism	1	1	ENSBTAT00000028059
4	GO:0010604	positive regulation of macromolecule metabolic process	GO:0043170, GO:0060255, GO:0009893	macromolecule metabolic process, regulation of macromolecule metabolic process, positive regulation of metabolic process	0.22	1	ENSBTAT00000068478
4	GO:0009894	regulation of catabolic process	GO:0019222, GO:0009056	regulation of metabolic process, catabolic process	0.22	1	ENSBTAT00000028059
4	GO:0007283	spermatogenesis	GO:0048232, GO:0003006	male gamete generation, developmental process involved in reproduction	1	1	ENSBTAT00000069271
4	GO:0060341	regulation of cellular localization	GO:0032879, GO:0051641	regulation of localization, cellular localization	0.22	1	ENSBTAT00000028059
4	GO:0006629	lipid metabolic process	GO:0044238, GO:0071704	primary metabolic process, organic substance metabolic process	0.13	1	ENSBTAT00000079143
4	GO:1901360	organic cyclic compound metabolic process	GO:0071704	organic substance metabolic process	0.99	11	ENSBTAT00000069531, ENSBTAT00000074027, ENSBTAT00000085141, ENSBTAT00000028059, ENSBTAT00000067876, ENSBTAT00000002751, ENSBTAT00000068478, ENSBTAT00000076263, ENSBTAT00000043915, ENSBTAT00000083540, ENSBTAT00000032902
4	GO:0042592	homeostatic process	GO:0065008	regulation of biological quality	0.36	1	ENSBTAT00000086103
5	GO:0051252	regulation of RNA metabolic process	GO:0016070, GO:0060255, GO:0019219	RNA metabolic process, regulation of macromolecule metabolic process, regulation of nucleobase-containing compound metabolic process	1.9	7	ENSBTAT00000028059, ENSBTAT00000067876, ENSBTAT00000002751, ENSBTAT00000068478, ENSBTAT00000076263, ENSBTAT00000043915, ENSBTAT00000032902
5	GO:0010508	positive regulation of autophagy	GO:0006914, GO:0031331, GO:0010506	autophagy, positive regulation of cellular catabolic process, regulation of autophagy	1	1	ENSBTAT00000028059
5	GO:0008654	phospholipid biosynthetic process	GO:0006644, GO:0044249, GO:0008610, GO:0090407	phospholipid metabolic process, cellular biosynthetic process, lipid biosynthetic process, organophosphate biosynthetic process	0.22	1	ENSBTAT00000079143
5	GO:0032897	negative regulation of viral transcription	GO:0046782, GO:0019083, GO:0048525	regulation of viral transcription, viral transcription, negative regulation of viral process	1	1	ENSBTAT00000028059
5	GO:0090304	nucleic acid metabolic process	GO:0043170, GO:0006139	macromolecule metabolic process, nucleobase-containing compound metabolic process	1.91	10	ENSBTAT00000069531, ENSBTAT00000074027, ENSBTAT00000028059, ENSBTAT00000067876, ENSBTAT00000002751, ENSBTAT00000068478, ENSBTAT00000076263, ENSBTAT00000043915, ENSBTAT00000083540, ENSBTAT00000032902
5	GO:0031329	regulation of cellular catabolic process	GO:0031323, GO:0044248, GO:0009894	regulation of cellular metabolic process, cellular catabolic process, regulation of catabolic process	0.36	1	ENSBTAT00000028059
5	GO:0010468	regulation of gene expression	GO:0060255, GO:0010467	regulation of macromolecule metabolic process, gene expression	5.27	7	ENSBTAT00000028059, ENSBTAT00000067876, ENSBTAT00000002751, ENSBTAT00000068478, ENSBTAT00000076263, ENSBTAT00000043915, ENSBTAT00000032902
5	GO:0018130	heterocycle biosynthetic process	GO:0044249, GO:0046483	cellular biosynthetic process, heterocycle metabolic process	0.92	8	ENSBTAT00000085141, ENSBTAT00000028059, ENSBTAT00000067876, ENSBTAT00000002751, ENSBTAT00000068478, ENSBTAT00000076263, ENSBTAT00000043915, ENSBTAT00000032902
5	GO:0006644	phospholipid metabolic process	GO:0019637, GO:0044255, GO:0006796	organophosphate metabolic process, cellular lipid metabolic process, phosphate-containing compound metabolic process	0.13	1	ENSBTAT00000079143
5	GO:0010557	positive regulation of macromolecule biosynthetic process	GO:0009891, GO:0010604, GO:0010556, GO:0009059	positive regulation of biosynthetic process, positive regulation of macromolecule metabolic process, regulation of macromolecule biosynthetic process, macromolecule biosynthetic process	0.13	1	ENSBTAT00000068478
5	GO:0043174	nucleoside salvage	GO:0009163, GO:0043094	nucleoside biosynthetic process, cellular metabolic compound salvage	0.6	1	ENSBTAT00000085141
5	GO:0022604	regulation of cell morphogenesis	GO:0022603, GO:0051128, GO:0000902	regulation of anatomical structure morphogenesis, regulation of cellular component organization, cell morphogenesis	0.6	1	ENSBTAT00000034825
5	GO:0034613	cellular protein localization	GO:0070727, GO:0008104	cellular macromolecule localization, protein localization	0.36	1	ENSBTAT00000028059
5	GO:0010506	regulation of autophagy	GO:0006914, GO:0031329	autophagy, regulation of cellular catabolic process	0.6	1	ENSBTAT00000028059
5	GO:0048232	male gamete generation	GO:0007276	gamete generation	0.6	1	ENSBTAT00000069271
5	GO:0030047	actin modification	GO:0030036, GO:0006464	actin cytoskeleton organization, cellular protein modification process	1	1	ENSBTAT00000024364
5	GO:0034404	nucleobase-containing small molecule biosynthetic process	GO:0055086, GO:0034654, GO:0044283	nucleobase-containing small molecule metabolic process, nucleobase-containing compound biosynthetic process, small molecule biosynthetic process	0.22	1	ENSBTAT00000085141
5	GO:0036211	protein modification process	GO:0019538, GO:0043412	protein metabolic process, macromolecule modification	0.94	3	ENSBTAT00000079143, ENSBTAT00000080234, ENSBTAT00000024364
5	GO:0046467	membrane lipid biosynthetic process	GO:0044249, GO:0008610, GO:0006643	cellular biosynthetic process, lipid biosynthetic process, membrane lipid metabolic process	0.36	1	ENSBTAT00000079143
5	GO:0031331	positive regulation of cellular catabolic process	GO:0009896, GO:0031329, GO:0044248, GO:0031325	positive regulation of catabolic process, regulation of cellular catabolic process, cellular catabolic process, positive regulation of cellular metabolic process	0.6	1	ENSBTAT00000028059
5	GO:1901137	carbohydrate derivative biosynthetic process	GO:1901576, GO:1901135	organic substance biosynthetic process, carbohydrate derivative metabolic process	0.49	2	ENSBTAT00000079143, ENSBTAT00000085141
5	GO:0043603	cellular amide metabolic process	GO:0034641	cellular nitrogen compound metabolic process	0.22	1	ENSBTAT00000019214
5	GO:0045935	positive regulation of nucleobase-containing compound metabolic process	GO:0051173, GO:0019219, GO:0031325, GO:0006139	positive regulation of nitrogen compound metabolic process, regulation of nucleobase-containing compound metabolic process, positive regulation of cellular metabolic process, nucleobase-containing compound metabolic process	0.08	1	ENSBTAT00000068478
5	GO:0010467	gene expression	GO:0043170	macromolecule metabolic process	5.26	10	ENSBTAT00000069531, ENSBTAT00000074027, ENSBTAT00000019214, ENSBTAT00000028059, ENSBTAT00000067876, ENSBTAT00000002751, ENSBTAT00000068478, ENSBTAT00000076263, ENSBTAT00000043915, ENSBTAT00000032902
5	GO:1901566	organonitrogen compound biosynthetic process	GO:1901576, GO:1901564	organic substance biosynthetic process, organonitrogen compound metabolic process	0.79	3	ENSBTAT00000079143, ENSBTAT00000019214, ENSBTAT00000085141
5	GO:0051276	chromosome organization	GO:0006996	organelle organization	0.82	2	ENSBTAT00000070528, ENSBTAT00000053474
5	GO:0006643	membrane lipid metabolic process	GO:0044255	cellular lipid metabolic process	0.22	1	ENSBTAT00000079143
5	GO:0055085	transmembrane transport	GO:0006810	transport	1	1	ENSBTAT00000076133
5	GO:0007010	cytoskeleton organization	GO:0006996	organelle organization	1.56	2	ENSBTAT00000024364, ENSBTAT00000034825
5	GO:0051701	interaction with host	GO:0044403	symbiotic process	0.21	1	ENSBTAT00000028059
5	GO:0022008	neurogenesis	GO:0030154, GO:0007399	cell differentiation, nervous system development	0.05	1	ENSBTAT00000079572
5	GO:0045161	neuronal ion channel clustering	GO:0061024, GO:0042551	membrane organization, neuron maturation	0.6	1	ENSBTAT00000079572
5	GO:0007167	enzyme linked receptor protein signaling pathway	GO:0007166	cell surface receptor signaling pathway	0.6	1	ENSBTAT00000080234
5	GO:1903827	regulation of cellular protein localization	GO:0034613, GO:0032880, GO:0060341	cellular protein localization, regulation of protein localization, regulation of cellular localization	0.36	1	ENSBTAT00000028059
5	GO:0007399	nervous system development	GO:0048731	system development	0.03	1	ENSBTAT00000079572
5	GO:0043101	purine-containing compound salvage	GO:0043094, GO:0034654, GO:0072522	cellular metabolic compound salvage, nucleobase-containing compound biosynthetic process, purine-containing compound biosynthetic process	0.6	1	ENSBTAT00000085141
5	GO:0008610	lipid biosynthetic process	GO:1901576, GO:0006629	organic substance biosynthetic process, lipid metabolic process	0.22	1	ENSBTAT00000079143
5	GO:0072521	purine-containing compound metabolic process	GO:0006725, GO:0034641, GO:1901360, GO:0046483, GO:1901564	cellular aromatic compound metabolic process, cellular nitrogen compound metabolic process, organic cyclic compound metabolic process, heterocycle metabolic process, organonitrogen compound metabolic process	0.22	1	ENSBTAT00000085141
5	GO:0019219	regulation of nucleobase-containing compound metabolic process	GO:0031323, GO:0080090, GO:0051171, GO:0006139	regulation of cellular metabolic process, regulation of primary metabolic process, regulation of nitrogen compound metabolic process, nucleobase-containing compound metabolic process	1.14	7	ENSBTAT00000028059, ENSBTAT00000067876, ENSBTAT00000002751, ENSBTAT00000068478, ENSBTAT00000076263, ENSBTAT00000043915, ENSBTAT00000032902
5	GO:0006796	phosphate-containing compound metabolic process	GO:0006793	phosphorus metabolic process	0.44	2	ENSBTAT00000079143, ENSBTAT00000080234
5	GO:0007249	I-kappaB kinase/NF-kappaB signaling	GO:0035556	intracellular signal transduction	0.6	1	ENSBTAT00000028059
5	GO:0000902	cell morphogenesis	GO:0032989	cellular component morphogenesis	0.36	1	ENSBTAT00000034825
5	GO:0006518	peptide metabolic process	GO:0043603, GO:1901564	cellular amide metabolic process, organonitrogen compound metabolic process	0.36	1	ENSBTAT00000019214
5	GO:0019438	aromatic compound biosynthetic process	GO:0006725, GO:0044249	cellular aromatic compound metabolic process, cellular biosynthetic process	0.92	8	ENSBTAT00000085141, ENSBTAT00000028059, ENSBTAT00000067876, ENSBTAT00000002751, ENSBTAT00000068478, ENSBTAT00000076263, ENSBTAT00000043915, ENSBTAT00000032902
5	GO:0045017	glycerolipid biosynthetic process	GO:0044249, GO:0008610, GO:0046486	cellular biosynthetic process, lipid biosynthetic process, glycerolipid metabolic process	0.22	1	ENSBTAT00000079143
5	GO:0006974	cellular response to DNA damage stimulus	GO:0033554	cellular response to stress	0.6	1	ENSBTAT00000083540
5	GO:0031326	regulation of cellular biosynthetic process	GO:0044249, GO:0031323, GO:0009889	cellular biosynthetic process, regulation of cellular metabolic process, regulation of biosynthetic process	3.16	7	ENSBTAT00000028059, ENSBTAT00000067876, ENSBTAT00000002751, ENSBTAT00000068478, ENSBTAT00000076263, ENSBTAT00000043915, ENSBTAT00000032902
5	GO:0051254	positive regulation of RNA metabolic process	GO:0016070, GO:0051252, GO:0010604, GO:0045935	RNA metabolic process, regulation of RNA metabolic process, positive regulation of macromolecule metabolic process, positive regulation of nucleobase-containing compound metabolic process	0.13	1	ENSBTAT00000068478
5	GO:1903901	negative regulation of viral life cycle	GO:1903900, GO:0019058, GO:0048525	regulation of viral life cycle, viral life cycle, negative regulation of viral process	1.2	1	ENSBTAT00000028059
5	GO:0010556	regulation of macromolecule biosynthetic process	GO:0060255, GO:0009889, GO:0009059	regulation of macromolecule metabolic process, regulation of biosynthetic process, macromolecule biosynthetic process	3.16	7	ENSBTAT00000028059, ENSBTAT00000067876, ENSBTAT00000002751, ENSBTAT00000068478, ENSBTAT00000076263, ENSBTAT00000043915, ENSBTAT00000032902
5	GO:1901362	organic cyclic compound biosynthetic process	GO:1901576, GO:1901360	organic substance biosynthetic process, organic cyclic compound metabolic process	0.92	8	ENSBTAT00000085141, ENSBTAT00000028059, ENSBTAT00000067876, ENSBTAT00000002751, ENSBTAT00000068478, ENSBTAT00000076263, ENSBTAT00000043915, ENSBTAT00000032902
5	GO:0009059	macromolecule biosynthetic process	GO:0043170, GO:1901576	macromolecule metabolic process, organic substance biosynthetic process	2.8	10	ENSBTAT00000079143, ENSBTAT00000019214, ENSBTAT00000028059, ENSBTAT00000067876, ENSBTAT00000002751, ENSBTAT00000068478, ENSBTAT00000076263, ENSBTAT00000043915, ENSBTAT00000083540, ENSBTAT00000032902
5	GO:0034645	cellular macromolecule biosynthetic process	GO:0044249, GO:0044260, GO:0009059	cellular biosynthetic process, cellular macromolecule metabolic process, macromolecule biosynthetic process	4.66	10	ENSBTAT00000079143, ENSBTAT00000019214, ENSBTAT00000028059, ENSBTAT00000067876, ENSBTAT00000002751, ENSBTAT00000068478, ENSBTAT00000076263, ENSBTAT00000043915, ENSBTAT00000083540, ENSBTAT00000032902
5	GO:0006811	ion transport	GO:0006810	transport	0.22	1	ENSBTAT00000076133
5	GO:0009116	nucleoside metabolic process	GO:1901657, GO:0055086, GO:1901564	glycosyl compound metabolic process, nucleobase-containing small molecule metabolic process, organonitrogen compound metabolic process	0.22	1	ENSBTAT00000085141
5	GO:1902533	positive regulation of intracellular signal transduction	GO:1902531, GO:0009967, GO:0035556	regulation of intracellular signal transduction, positive regulation of signal transduction, intracellular signal transduction	0.6	1	ENSBTAT00000028059
5	GO:0090407	organophosphate biosynthetic process	GO:0019637, GO:1901576	organophosphate metabolic process, organic substance biosynthetic process	0.13	1	ENSBTAT00000079143
5	GO:0003341	cilium movement	GO:0007018	microtubule-based movement	1	1	ENSBTAT00000076256
5	GO:0043412	macromolecule modification	GO:0043170	macromolecule metabolic process	0.56	3	ENSBTAT00000079143, ENSBTAT00000080234, ENSBTAT00000024364
5	GO:0044267	cellular protein metabolic process	GO:0019538, GO:0044260	protein metabolic process, cellular macromolecule metabolic process	1.54	4	ENSBTAT00000079143, ENSBTAT00000080234, ENSBTAT00000024364, ENSBTAT00000019214
5	GO:0030182	neuron differentiation	GO:0048699, GO:0030154	generation of neurons, cell differentiation	0.13	1	ENSBTAT00000079572
5	GO:0050792	regulation of viral process	GO:0043903, GO:0016032	regulation of symbiosis, encompassing mutualism through parasitism, viral process	0.79	1	ENSBTAT00000028059
5	GO:0016032	viral process	GO:0044403	symbiotic process	0.94	1	ENSBTAT00000028059
5	GO:0042551	neuron maturation	GO:0048469, GO:0048666, GO:0071695	cell maturation, neuron development, anatomical structure maturation	0.36	1	ENSBTAT00000079572
5	GO:1902531	regulation of intracellular signal transduction	GO:0009966, GO:0035556	regulation of signal transduction, intracellular signal transduction	0.36	1	ENSBTAT00000028059
5	GO:0006259	DNA metabolic process	GO:0044260, GO:0090304	cellular macromolecule metabolic process, nucleic acid metabolic process	0.6	1	ENSBTAT00000083540
5	GO:0034654	nucleobase-containing compound biosynthetic process	GO:1901362, GO:0044271, GO:0019438, GO:0018130, GO:0006139	organic cyclic compound biosynthetic process, cellular nitrogen compound biosynthetic process, aromatic compound biosynthetic process, heterocycle biosynthetic process, nucleobase-containing compound metabolic process	1.53	8	ENSBTAT00000028059, ENSBTAT00000067876, ENSBTAT00000085141, ENSBTAT00000002751, ENSBTAT00000068478, ENSBTAT00000076263, ENSBTAT00000043915, ENSBTAT00000032902
5	GO:0044271	cellular nitrogen compound biosynthetic process	GO:0044249, GO:0034641	cellular biosynthetic process, cellular nitrogen compound metabolic process	1.13	9	ENSBTAT00000019214, ENSBTAT00000085141, ENSBTAT00000028059, ENSBTAT00000067876, ENSBTAT00000002751, ENSBTAT00000068478, ENSBTAT00000076263, ENSBTAT00000043915, ENSBTAT00000032902
5	GO:0010628	positive regulation of gene expression	GO:0010604, GO:0010468, GO:0010467	positive regulation of macromolecule metabolic process, regulation of gene expression, gene expression	0.36	1	ENSBTAT00000068478
5	GO:1903509	liposaccharide metabolic process	GO:0006629, GO:1901135	lipid metabolic process, carbohydrate derivative metabolic process	0.22	1	ENSBTAT00000079143
5	GO:0048666	neuron development	GO:0030182, GO:0048468	neuron differentiation, cell development	0.22	1	ENSBTAT00000079572
5	GO:0042157	lipoprotein metabolic process	GO:0019538	protein metabolic process	0.22	1	ENSBTAT00000079143
5	GO:1901657	glycosyl compound metabolic process	GO:1901135	carbohydrate derivative metabolic process	0.13	1	ENSBTAT00000085141
5	GO:0046486	glycerolipid metabolic process	GO:0044255	cellular lipid metabolic process	0.13	1	ENSBTAT00000079143
5	GO:0035890	exit from host	GO:0052126	movement in host environment	0.22	1	ENSBTAT00000028059
5	GO:0031328	positive regulation of cellular biosynthetic process	GO:0009891, GO:0044249, GO:0031326, GO:0031325	positive regulation of biosynthetic process, cellular biosynthetic process, regulation of cellular biosynthetic process, positive regulation of cellular metabolic process	0.13	1	ENSBTAT00000068478
6	GO:0006355	regulation of transcription, DNA-templated	GO:2000112, GO:1903506, GO:0006351, GO:0010468	regulation of cellular macromolecule biosynthetic process, regulation of nucleic acid-templated transcription, transcription, DNA-templated, regulation of gene expression	8.78	7	ENSBTAT00000028059, ENSBTAT00000067876, ENSBTAT00000002751, ENSBTAT00000068478, ENSBTAT00000076263, ENSBTAT00000043915, ENSBTAT00000032902
6	GO:0009247	glycolipid biosynthetic process	GO:1901137, GO:0046467, GO:0006664	carbohydrate derivative biosynthetic process, membrane lipid biosynthetic process, glycolipid metabolic process	0.6	1	ENSBTAT00000079143
6	GO:0033365	protein localization to organelle	GO:0034613	cellular protein localization	0.36	1	ENSBTAT00000028059
6	GO:0006464	cellular protein modification process	GO:0036211, GO:0044267	protein modification process, cellular protein metabolic process	1.56	3	ENSBTAT00000079143, ENSBTAT00000080234, ENSBTAT00000024364
6	GO:1903900	regulation of viral life cycle	GO:0050792, GO:0019058	regulation of viral process, viral life cycle	0.72	1	ENSBTAT00000028059
6	GO:0048699	generation of neurons	GO:0022008	neurogenesis	0.08	1	ENSBTAT00000079572
6	GO:0045162	clustering of voltage-gated sodium channels	GO:0045161	neuronal ion channel clustering	1	1	ENSBTAT00000079572
6	GO:0043604	amide biosynthetic process	GO:0043603, GO:0044271	cellular amide metabolic process, cellular nitrogen compound biosynthetic process	0.36	1	ENSBTAT00000019214
6	GO:0006281	DNA repair	GO:0006259, GO:0006974	DNA metabolic process, cellular response to DNA damage stimulus	1	1	ENSBTAT00000083540
6	GO:0006664	glycolipid metabolic process	GO:1903509, GO:0006643	liposaccharide metabolic process, membrane lipid metabolic process	0.36	1	ENSBTAT00000079143
6	GO:0043123	positive regulation of I-kappaB kinase/NF-kappaB signaling	GO:0043122, GO:1902533, GO:0007249	regulation of I-kappaB kinase/NF-kappaB signaling, positive regulation of intracellular signal transduction, I-kappaB kinase/NF-kappaB signaling	1	1	ENSBTAT00000028059
6	GO:0009163	nucleoside biosynthetic process	GO:0034404, GO:1901659, GO:0009116, GO:1901566	nucleobase-containing small molecule biosynthetic process, glycosyl compound biosynthetic process, nucleoside metabolic process, organonitrogen compound biosynthetic process	0.36	1	ENSBTAT00000085141
6	GO:0032774	RNA biosynthetic process	GO:0016070, GO:0034654, GO:0009059	RNA metabolic process, nucleobase-containing compound biosynthetic process, macromolecule biosynthetic process	1.95	7	ENSBTAT00000028059, ENSBTAT00000067876, ENSBTAT00000002751, ENSBTAT00000068478, ENSBTAT00000076263, ENSBTAT00000043915, ENSBTAT00000032902
6	GO:0072522	purine-containing compound biosynthetic process	GO:1901566, GO:1901362, GO:0044271, GO:0019438, GO:0018130, GO:0072521	organonitrogen compound biosynthetic process, organic cyclic compound biosynthetic process, cellular nitrogen compound biosynthetic process, aromatic compound biosynthetic process, heterocycle biosynthetic process, purine-containing compound metabolic process	0.36	1	ENSBTAT00000085141
6	GO:0016310	phosphorylation	GO:0006796	phosphate-containing compound metabolic process	0.6	1	ENSBTAT00000080234
6	GO:1900180	regulation of protein localization to nucleus	GO:1903827, GO:0034504	regulation of cellular protein localization, protein localization to nucleus	0.6	1	ENSBTAT00000028059
6	GO:0035891	exit from host cell	GO:0035890	exit from host	0.36	1	ENSBTAT00000028059
6	GO:0046474	glycerophospholipid biosynthetic process	GO:0006650, GO:0045017, GO:0008654	glycerophospholipid metabolic process, glycerolipid biosynthetic process, phospholipid biosynthetic process	0.36	1	ENSBTAT00000079143
6	GO:0043043	peptide biosynthetic process	GO:1901566, GO:0006518, GO:0043604	organonitrogen compound biosynthetic process, peptide metabolic process, amide biosynthetic process	0.6	1	ENSBTAT00000019214
6	GO:0006650	glycerophospholipid metabolic process	GO:0006644, GO:0046486	phospholipid metabolic process, glycerolipid metabolic process	0.22	1	ENSBTAT00000079143
6	GO:0006351	transcription, DNA-templated	GO:0034645, GO:0097659, GO:0010467	cellular macromolecule biosynthetic process, nucleic acid-templated transcription, gene expression	5.41	7	ENSBTAT00000028059, ENSBTAT00000067876, ENSBTAT00000002751, ENSBTAT00000068478, ENSBTAT00000076263, ENSBTAT00000043915, ENSBTAT00000032902
6	GO:2001141	regulation of RNA biosynthetic process	GO:0032774, GO:0031326, GO:0051252, GO:0010556	RNA biosynthetic process, regulation of cellular biosynthetic process, regulation of RNA metabolic process, regulation of macromolecule biosynthetic process	3.16	7	ENSBTAT00000028059, ENSBTAT00000067876, ENSBTAT00000002751, ENSBTAT00000068478, ENSBTAT00000076263, ENSBTAT00000043915, ENSBTAT00000032902
6	GO:0019080	viral gene expression	GO:0016032	viral process	0.36	1	ENSBTAT00000028059
6	GO:0042158	lipoprotein biosynthetic process	GO:0034645, GO:1901566, GO:0042157	cellular macromolecule biosynthetic process, organonitrogen compound biosynthetic process, lipoprotein metabolic process	0.36	1	ENSBTAT00000079143
6	GO:0045893	positive regulation of transcription, DNA-templated	GO:0006355, GO:0010628, GO:0006351, GO:1903508	regulation of transcription, DNA-templated, positive regulation of gene expression, transcription, DNA-templated, positive regulation of nucleic acid-templated transcription	0.6	1	ENSBTAT00000068478
6	GO:0044409	entry into host	GO:0051701	interaction with host	0.22	1	ENSBTAT00000028059
6	GO:0006412	translation	GO:0034645, GO:0044267, GO:0043043, GO:0010467	cellular macromolecule biosynthetic process, cellular protein metabolic process, peptide biosynthetic process, gene expression	1	1	ENSBTAT00000019214
6	GO:0046782	regulation of viral transcription	GO:0019083, GO:0050792	viral transcription, regulation of viral process	0.6	1	ENSBTAT00000028059
6	GO:0006260	DNA replication	GO:0034645	cellular macromolecule biosynthetic process	1	1	ENSBTAT00000083540
6	GO:0006396	RNA processing	GO:0016070, GO:0010467	RNA metabolic process, gene expression	2.36	2	ENSBTAT00000069531, ENSBTAT00000074027
6	GO:0006166	purine ribonucleoside salvage	GO:0043174, GO:0046129, GO:0043101	nucleoside salvage, purine ribonucleoside biosynthetic process, purine-containing compound salvage	1	1	ENSBTAT00000085141
6	GO:0009119	ribonucleoside metabolic process	GO:0009116	nucleoside metabolic process	0.22	1	ENSBTAT00000085141
6	GO:0043122	regulation of I-kappaB kinase/NF-kappaB signaling	GO:1902531, GO:0007249	regulation of intracellular signal transduction, I-kappaB kinase/NF-kappaB signaling	0.6	1	ENSBTAT00000028059
6	GO:0016070	RNA metabolic process	GO:0090304	nucleic acid metabolic process	2.58	9	ENSBTAT00000069531, ENSBTAT00000074027, ENSBTAT00000028059, ENSBTAT00000067876, ENSBTAT00000002751, ENSBTAT00000068478, ENSBTAT00000076263, ENSBTAT00000043915, ENSBTAT00000032902
6	GO:1901659	glycosyl compound biosynthetic process	GO:1901657, GO:1901137	glycosyl compound metabolic process, carbohydrate derivative biosynthetic process	0.22	1	ENSBTAT00000085141
6	GO:0019058	viral life cycle	GO:0016032	viral process	0.72	1	ENSBTAT00000028059
6	GO:0046597	negative regulation of viral entry into host cell	GO:0046718, GO:1903901, GO:0046596	viral entry into host cell, negative regulation of viral life cycle, regulation of viral entry into host cell	1	1	ENSBTAT00000028059
6	GO:0071103	DNA conformation change	GO:0051276	chromosome organization	0.36	1	ENSBTAT00000070528
6	GO:0042278	purine nucleoside metabolic process	GO:0009116, GO:0072521	nucleoside metabolic process, purine-containing compound metabolic process	0.22	1	ENSBTAT00000085141
6	GO:0019076	viral release from host cell	GO:0019058, GO:0035891, GO:0016032	viral life cycle, exit from host cell, viral process	0.6	1	ENSBTAT00000028059
6	GO:2000112	regulation of cellular macromolecule biosynthetic process	GO:0034645, GO:0031326, GO:0010556	cellular macromolecule biosynthetic process, regulation of cellular biosynthetic process, regulation of macromolecule biosynthetic process	5.27	7	ENSBTAT00000028059, ENSBTAT00000067876, ENSBTAT00000002751, ENSBTAT00000068478, ENSBTAT00000076263, ENSBTAT00000043915, ENSBTAT00000032902
6	GO:1902680	positive regulation of RNA biosynthetic process	GO:0010557, GO:0032774, GO:0051254, GO:0031328, GO:2001141	positive regulation of macromolecule biosynthetic process, RNA biosynthetic process, positive regulation of RNA metabolic process, positive regulation of cellular biosynthetic process, regulation of RNA biosynthetic process	0.22	1	ENSBTAT00000068478
6	GO:0019083	viral transcription	GO:0019080, GO:0016032	viral gene expression, viral process	0.6	1	ENSBTAT00000028059
6	GO:0007178	transmembrane receptor protein serine/threonine kinase signaling pathway	GO:0007167	enzyme linked receptor protein signaling pathway	1	1	ENSBTAT00000080234
6	GO:0006812	cation transport	GO:0006811	ion transport	0.36	1	ENSBTAT00000076133
7	GO:0006506	GPI anchor biosynthetic process	GO:0006497, GO:0009247, GO:0006505, GO:0006661	protein lipidation, glycolipid biosynthetic process, GPI anchor metabolic process, phosphatidylinositol biosynthetic process	1	1	ENSBTAT00000079143
7	GO:0006468	protein phosphorylation	GO:0016310, GO:0006464	phosphorylation, cellular protein modification process	1	1	ENSBTAT00000080234
7	GO:0042451	purine nucleoside biosynthetic process	GO:0009163, GO:0042278, GO:0072522	nucleoside biosynthetic process, purine nucleoside metabolic process, purine-containing compound biosynthetic process	0.36	1	ENSBTAT00000085141
7	GO:0046128	purine ribonucleoside metabolic process	GO:0042278, GO:0009119	purine nucleoside metabolic process, ribonucleoside metabolic process	0.36	1	ENSBTAT00000085141
7	GO:0046596	regulation of viral entry into host cell	GO:0046718, GO:1903900	viral entry into host cell, regulation of viral life cycle	0.6	1	ENSBTAT00000028059
7	GO:1903508	positive regulation of nucleic acid-templated transcription	GO:1903506, GO:1902680, GO:0097659	regulation of nucleic acid-templated transcription, positive regulation of RNA biosynthetic process, nucleic acid-templated transcription	0.36	1	ENSBTAT00000068478
7	GO:0006505	GPI anchor metabolic process	GO:0006664, GO:0046488	glycolipid metabolic process, phosphatidylinositol metabolic process	0.6	1	ENSBTAT00000079143
7	GO:0030001	metal ion transport	GO:0006812	cation transport	0.6	1	ENSBTAT00000076133
7	GO:0006366	transcription by RNA polymerase II	GO:0006351	transcription, DNA-templated	1.8	2	ENSBTAT00000067876, ENSBTAT00000068478
7	GO:0046488	phosphatidylinositol metabolic process	GO:0006650	glycerophospholipid metabolic process	0.36	1	ENSBTAT00000079143
7	GO:0034504	protein localization to nucleus	GO:0033365	protein localization to organelle	0.6	1	ENSBTAT00000028059
7	GO:0030260	entry into host cell	GO:0044409	entry into host	0.36	1	ENSBTAT00000028059
7	GO:0006661	phosphatidylinositol biosynthetic process	GO:0046474, GO:0046488	glycerophospholipid biosynthetic process, phosphatidylinositol metabolic process	0.6	1	ENSBTAT00000079143
7	GO:0045944	positive regulation of transcription by RNA polymerase II	GO:0045893, GO:0006366, GO:0006357	positive regulation of transcription, DNA-templated, transcription by RNA polymerase II, regulation of transcription by RNA polymerase II	1	1	ENSBTAT00000068478
7	GO:0042455	ribonucleoside biosynthetic process	GO:0009163, GO:0009119	nucleoside biosynthetic process, ribonucleoside metabolic process	0.36	1	ENSBTAT00000085141
7	GO:0015672	monovalent inorganic cation transport	GO:0006812	cation transport	0.6	1	ENSBTAT00000076133
7	GO:0006497	protein lipidation	GO:0042158, GO:0006464	lipoprotein biosynthetic process, cellular protein modification process	0.6	1	ENSBTAT00000079143
7	GO:0006357	regulation of transcription by RNA polymerase II	GO:0006355, GO:0006366	regulation of transcription, DNA-templated, transcription by RNA polymerase II	2.6	2	ENSBTAT00000067876, ENSBTAT00000068478
7	GO:1903506	regulation of nucleic acid-templated transcription	GO:0097659, GO:2001141	nucleic acid-templated transcription, regulation of RNA biosynthetic process	5.27	7	ENSBTAT00000028059, ENSBTAT00000067876, ENSBTAT00000002751, ENSBTAT00000068478, ENSBTAT00000076263, ENSBTAT00000043915, ENSBTAT00000032902
7	GO:0034470	ncRNA processing	GO:0006396, GO:0034660	RNA processing, ncRNA metabolic process	0.6	1	ENSBTAT00000074027
7	GO:0034660	ncRNA metabolic process	GO:0016070	RNA metabolic process	0.36	1	ENSBTAT00000074027
7	GO:0006323	DNA packaging	GO:0071103	DNA conformation change	0.6	1	ENSBTAT00000070528
7	GO:0046718	viral entry into host cell	GO:0030260, GO:0019058	entry into host cell, viral life cycle	0.6	1	ENSBTAT00000028059
7	GO:0097659	nucleic acid-templated transcription	GO:0032774	RNA biosynthetic process	3.25	7	ENSBTAT00000028059, ENSBTAT00000067876, ENSBTAT00000002751, ENSBTAT00000068478, ENSBTAT00000076263, ENSBTAT00000043915, ENSBTAT00000032902
8	GO:0006813	potassium ion transport	GO:0030001, GO:0015672	metal ion transport, monovalent inorganic cation transport	1	1	ENSBTAT00000076133
8	GO:0030261	chromosome condensation	GO:0006323	DNA packaging	1	1	ENSBTAT00000070528
8	GO:0016073	snRNA metabolic process	GO:0034660	ncRNA metabolic process	0.6	1	ENSBTAT00000074027
8	GO:0046129	purine ribonucleoside biosynthetic process	GO:0042455, GO:0042451, GO:0046128	ribonucleoside biosynthetic process, purine nucleoside biosynthetic process, purine ribonucleoside metabolic process	0.6	1	ENSBTAT00000085141
8	GO:0016180	snRNA processing	GO:0034470, GO:0016073	ncRNA processing, snRNA metabolic process	1	1	ENSBTAT00000074027

## Sheet: Table S5
Table S5. A summary of Gos in biological process for the 21 abundantly expressed transcripts in seronegative group
GO level	GO ID	GO Name	Parents (ACC)	Parents (Name)	Nodescore	Number of transcripts	Transcript ID
1	GO:0008150	biological_process			2.69	13	ENSBTAT00000070366, ENSBTAT00000021345, ENSBTAT00000071002, ENSBTAT00000048998, ENSBTAT00000021122, ENSBTAT00000086508, ENSBTAT00000069904, ENSBTAT00000075085, ENSBTAT00000073123, ENSBTAT00000083079, ENSBTAT00000061421, ENSBTAT00000015995, ENSBTAT00000013607
2	GO:0008152	metabolic process	GO:0008150	biological_process	1.96	7	ENSBTAT00000070366, ENSBTAT00000071002, ENSBTAT00000061421, ENSBTAT00000015995, ENSBTAT00000086508, ENSBTAT00000013607, ENSBTAT00000075085
2	GO:0009987	cellular process	GO:0008150	biological_process	1.73	8	ENSBTAT00000070366, ENSBTAT00000021345, ENSBTAT00000061421, ENSBTAT00000015995, ENSBTAT00000086508, ENSBTAT00000013607, ENSBTAT00000075085, ENSBTAT00000073123
2	GO:0051179	localization	GO:0008150	biological_process	1.47	5	ENSBTAT00000083079, ENSBTAT00000021345, ENSBTAT00000048998, ENSBTAT00000021122, ENSBTAT00000069904
2	GO:0050789	regulation of biological process	GO:0008150, GO:0065007	biological_process, biological regulation	0.23	2	ENSBTAT00000070366, ENSBTAT00000021345
2	GO:0065007	biological regulation	GO:0008150	biological_process	0.14	2	ENSBTAT00000070366, ENSBTAT00000021345
2	GO:0050896	response to stimulus	GO:0008150	biological_process	0.08	1	ENSBTAT00000061421
2	GO:0071840	cellular component organization or biogenesis	GO:0008150	biological_process	0.78	2	ENSBTAT00000021345, ENSBTAT00000073123
2	GO:0002376	immune system process	GO:0008150	biological_process	0.13	1	ENSBTAT00000048998
3	GO:0071704	organic substance metabolic process	GO:0008152	metabolic process	1.47	6	ENSBTAT00000070366, ENSBTAT00000071002, ENSBTAT00000061421, ENSBTAT00000015995, ENSBTAT00000086508, ENSBTAT00000075085
3	GO:0051234	establishment of localization	GO:0051179	localization	2.04	5	ENSBTAT00000083079, ENSBTAT00000021345, ENSBTAT00000048998, ENSBTAT00000021122, ENSBTAT00000069904
3	GO:0006807	nitrogen compound metabolic process	GO:0008152	metabolic process	0.81	5	ENSBTAT00000070366, ENSBTAT00000071002, ENSBTAT00000061421, ENSBTAT00000086508, ENSBTAT00000075085
3	GO:0033036	macromolecule localization	GO:0051179	localization	0.61	2	ENSBTAT00000083079, ENSBTAT00000021345
3	GO:0044281	small molecule metabolic process	GO:0008152	metabolic process	0.08	1	ENSBTAT00000086508
3	GO:0016043	cellular component organization	GO:0071840, GO:0009987	cellular component organization or biogenesis, cellular process	1.31	2	ENSBTAT00000021345, ENSBTAT00000073123
3	GO:0051641	cellular localization	GO:0051179	localization	0.81	2	ENSBTAT00000021345, ENSBTAT00000069904
3	GO:0019222	regulation of metabolic process	GO:0008152, GO:0050789	metabolic process, regulation of biological process	0.26	1	ENSBTAT00000070366
3	GO:0007017	microtubule-based process	GO:0009987	cellular process	0.96	1	ENSBTAT00000021345
3	GO:0050794	regulation of cellular process	GO:0050789, GO:0009987	regulation of biological process, cellular process	0.16	1	ENSBTAT00000070366
3	GO:0019882	antigen processing and presentation	GO:0002376	immune system process	0.22	1	ENSBTAT00000048998
3	GO:0055114	oxidation-reduction process	GO:0008152	metabolic process	1	1	ENSBTAT00000015995
3	GO:0009058	biosynthetic process	GO:0008152	metabolic process	0.29	2	ENSBTAT00000070366, ENSBTAT00000086508
3	GO:0009056	catabolic process	GO:0008152	metabolic process	0.08	1	ENSBTAT00000075085
3	GO:0051716	cellular response to stimulus	GO:0050896, GO:0009987	response to stimulus, cellular process	0.13	1	ENSBTAT00000061421
3	GO:0044238	primary metabolic process	GO:0008152	metabolic process	1.19	5	ENSBTAT00000070366, ENSBTAT00000071002, ENSBTAT00000061421, ENSBTAT00000086508, ENSBTAT00000075085
3	GO:0006950	response to stress	GO:0050896	response to stimulus	0.13	1	ENSBTAT00000061421
3	GO:0032879	regulation of localization	GO:0051179, GO:0050789	localization, regulation of biological process	0.13	1	ENSBTAT00000021345
3	GO:0044237	cellular metabolic process	GO:0008152, GO:0009987	metabolic process, cellular process	1.36	6	ENSBTAT00000070366, ENSBTAT00000061421, ENSBTAT00000015995, ENSBTAT00000086508, ENSBTAT00000013607, ENSBTAT00000075085
3	GO:0044085	cellular component biogenesis	GO:0071840	cellular component organization or biogenesis	0.36	1	ENSBTAT00000073123
4	GO:0022607	cellular component assembly	GO:0016043, GO:0044085	cellular component organization, cellular component biogenesis	0.6	1	ENSBTAT00000073123
4	GO:0006793	phosphorus metabolic process	GO:0044237	cellular metabolic process	0.36	1	ENSBTAT00000013607
4	GO:0043170	macromolecule metabolic process	GO:0071704	organic substance metabolic process	1.32	4	ENSBTAT00000070366, ENSBTAT00000071002, ENSBTAT00000061421, ENSBTAT00000075085
4	GO:0006996	organelle organization	GO:0016043	cellular component organization	0.79	1	ENSBTAT00000021345
4	GO:0010876	lipid localization	GO:0033036	macromolecule localization	0.6	1	ENSBTAT00000083079
4	GO:0006081	cellular aldehyde metabolic process	GO:0071704, GO:0044237	organic substance metabolic process, cellular metabolic process	1	1	ENSBTAT00000015995
4	GO:0045184	establishment of protein localization	GO:0008104, GO:0051234	protein localization, establishment of localization	0.26	1	ENSBTAT00000021345
4	GO:0031023	microtubule organizing center organization	GO:0007017, GO:0000226, GO:0016043	microtubule-based process, microtubule cytoskeleton organization, cellular component organization	1	1	ENSBTAT00000021345
4	GO:0043933	protein-containing complex subunit organization	GO:0016043	cellular component organization	0.6	1	ENSBTAT00000073123
4	GO:0044260	cellular macromolecule metabolic process	GO:0043170, GO:0044237	macromolecule metabolic process, cellular metabolic process	0.68	3	ENSBTAT00000070366, ENSBTAT00000061421, ENSBTAT00000075085
4	GO:0006082	organic acid metabolic process	GO:0071704, GO:0044281, GO:0044237	organic substance metabolic process, small molecule metabolic process, cellular metabolic process	0.13	1	ENSBTAT00000086508
4	GO:0008104	protein localization	GO:0033036	macromolecule localization	0.42	1	ENSBTAT00000021345
4	GO:0044249	cellular biosynthetic process	GO:0009058, GO:0044237	biosynthetic process, cellular metabolic process	0.48	2	ENSBTAT00000070366, ENSBTAT00000086508
4	GO:0060341	regulation of cellular localization	GO:0051641, GO:0032879	cellular localization, regulation of localization	0.22	1	ENSBTAT00000021345
4	GO:0034641	cellular nitrogen compound metabolic process	GO:0006807, GO:0044237	nitrogen compound metabolic process, cellular metabolic process	0.4	3	ENSBTAT00000070366, ENSBTAT00000061421, ENSBTAT00000086508
4	GO:0070727	cellular macromolecule localization	GO:0051641, GO:0033036	cellular localization, macromolecule localization	0.42	1	ENSBTAT00000021345
4	GO:0060255	regulation of macromolecule metabolic process	GO:0019222, GO:0043170	regulation of metabolic process, macromolecule metabolic process	0.43	1	ENSBTAT00000070366
4	GO:1901360	organic cyclic compound metabolic process	GO:0071704	organic substance metabolic process	0.18	2	ENSBTAT00000070366, ENSBTAT00000061421
4	GO:0031323	regulation of cellular metabolic process	GO:0019222, GO:0050794, GO:0044237	regulation of metabolic process, regulation of cellular process, cellular metabolic process	0.26	1	ENSBTAT00000070366
4	GO:0051049	regulation of transport	GO:0032879, GO:0006810	regulation of localization, transport	0.22	1	ENSBTAT00000021345
4	GO:0006725	cellular aromatic compound metabolic process	GO:0044237	cellular metabolic process	0.18	2	ENSBTAT00000070366, ENSBTAT00000061421
4	GO:0046483	heterocycle metabolic process	GO:0044237	cellular metabolic process	0.18	2	ENSBTAT00000070366, ENSBTAT00000061421
4	GO:0006810	transport	GO:0051234	establishment of localization	3.4	5	ENSBTAT00000083079, ENSBTAT00000021345, ENSBTAT00000048998, ENSBTAT00000021122, ENSBTAT00000069904
4	GO:0009889	regulation of biosynthetic process	GO:0009058, GO:0019222	biosynthetic process, regulation of metabolic process	0.26	1	ENSBTAT00000070366
4	GO:0006139	nucleobase-containing compound metabolic process	GO:0006725, GO:1901360, GO:0046483, GO:0034641, GO:0044238	cellular aromatic compound metabolic process, organic cyclic compound metabolic process, heterocycle metabolic process, cellular nitrogen compound metabolic process, primary metabolic process	0.31	2	ENSBTAT00000070366, ENSBTAT00000061421
4	GO:0046907	intracellular transport	GO:0051641, GO:0006810	cellular localization, transport	1.14	2	ENSBTAT00000021345, ENSBTAT00000069904
4	GO:0051171	regulation of nitrogen compound metabolic process	GO:0019222, GO:0006807	regulation of metabolic process, nitrogen compound metabolic process	0.09	1	ENSBTAT00000070366
4	GO:0080090	regulation of primary metabolic process	GO:0019222, GO:0044238	regulation of metabolic process, primary metabolic process	0.09	1	ENSBTAT00000070366
4	GO:0033554	cellular response to stress	GO:0051716, GO:0006950	cellular response to stimulus, response to stress	0.22	1	ENSBTAT00000061421
4	GO:1901564	organonitrogen compound metabolic process	GO:0071704, GO:0006807	organic substance metabolic process, nitrogen compound metabolic process	1.01	3	ENSBTAT00000071002, ENSBTAT00000086508, ENSBTAT00000075085
4	GO:0032880	regulation of protein localization	GO:0008104, GO:0032879	protein localization, regulation of localization	0.22	1	ENSBTAT00000021345
4	GO:0048002	antigen processing and presentation of peptide antigen	GO:0019882	antigen processing and presentation	0.36	1	ENSBTAT00000048998
4	GO:0019883	antigen processing and presentation of endogenous antigen	GO:0019882	antigen processing and presentation	0.36	1	ENSBTAT00000048998
4	GO:1901576	organic substance biosynthetic process	GO:0009058, GO:0071704	biosynthetic process, organic substance metabolic process	0.34	2	ENSBTAT00000070366, ENSBTAT00000086508
4	GO:0019538	protein metabolic process	GO:0043170, GO:0044238, GO:1901564	macromolecule metabolic process, primary metabolic process, organonitrogen compound metabolic process	1.55	2	ENSBTAT00000071002, ENSBTAT00000075085
4	GO:1901575	organic substance catabolic process	GO:0009056, GO:0071704	catabolic process, organic substance metabolic process	0.08	1	ENSBTAT00000075085
4	GO:0000226	microtubule cytoskeleton organization	GO:0007017, GO:0007010	microtubule-based process, cytoskeleton organization	1.2	1	ENSBTAT00000021345
4	GO:0044248	cellular catabolic process	GO:0009056, GO:0044237	catabolic process, cellular metabolic process	0.13	1	ENSBTAT00000075085
4	GO:0044283	small molecule biosynthetic process	GO:0009058, GO:0044281	biosynthetic process, small molecule metabolic process	0.13	1	ENSBTAT00000086508
4	GO:0006520	cellular amino acid metabolic process	GO:0019752, GO:0044238, GO:1901564	carboxylic acid metabolic process, primary metabolic process, organonitrogen compound metabolic process	0.13	1	ENSBTAT00000086508
4	GO:0010256	endomembrane system organization	GO:0016043	cellular component organization	0.36	1	ENSBTAT00000021345
5	GO:0007010	cytoskeleton organization	GO:0006996	organelle organization	0.72	1	ENSBTAT00000021345
5	GO:0070201	regulation of establishment of protein localization	GO:0045184, GO:0032880	establishment of protein localization, regulation of protein localization	0.22	1	ENSBTAT00000021345
5	GO:0034645	cellular macromolecule biosynthetic process	GO:0044260, GO:0044249, GO:0009059	cellular macromolecule metabolic process, cellular biosynthetic process, macromolecule biosynthetic process	0.43	1	ENSBTAT00000070366
5	GO:0043603	cellular amide metabolic process	GO:0034641	cellular nitrogen compound metabolic process	0.36	1	ENSBTAT00000086508
5	GO:0072594	establishment of protein localization to organelle	GO:0045184, GO:0033365	establishment of protein localization, protein localization to organelle	0.22	1	ENSBTAT00000021345
5	GO:1901362	organic cyclic compound biosynthetic process	GO:1901576, GO:1901360	organic substance biosynthetic process, organic cyclic compound metabolic process	0.18	1	ENSBTAT00000070366
5	GO:0019438	aromatic compound biosynthetic process	GO:0006725, GO:0044249	cellular aromatic compound metabolic process, cellular biosynthetic process	0.18	1	ENSBTAT00000070366
5	GO:1901565	organonitrogen compound catabolic process	GO:1901575, GO:1901564	organic substance catabolic process, organonitrogen compound metabolic process	0.08	1	ENSBTAT00000075085
5	GO:0018130	heterocycle biosynthetic process	GO:0046483, GO:0044249	heterocycle metabolic process, cellular biosynthetic process	0.18	1	ENSBTAT00000070366
5	GO:0006259	DNA metabolic process	GO:0090304, GO:0044260	nucleic acid metabolic process, cellular macromolecule metabolic process	0.36	1	ENSBTAT00000061421
5	GO:0016192	vesicle-mediated transport	GO:0006810	transport	0.94	2	ENSBTAT00000021345, ENSBTAT00000069904
5	GO:0002483	antigen processing and presentation of endogenous peptide antigen	GO:0048002, GO:0019883	antigen processing and presentation of peptide antigen, antigen processing and presentation of endogenous antigen	0.6	1	ENSBTAT00000048998
5	GO:0055085	transmembrane transport	GO:0006810	transport	2	2	ENSBTAT00000048998, ENSBTAT00000021122
5	GO:0006869	lipid transport	GO:0010876, GO:0071702	lipid localization, organic substance transport	1	1	ENSBTAT00000083079
5	GO:0043412	macromolecule modification	GO:0043170	macromolecule metabolic process	0.08	1	ENSBTAT00000075085
5	GO:0010467	gene expression	GO:0043170	macromolecule metabolic process	0.43	1	ENSBTAT00000070366
5	GO:0036211	protein modification process	GO:0043412, GO:0019538	macromolecule modification, protein metabolic process	0.13	1	ENSBTAT00000075085
5	GO:0007034	vacuolar transport	GO:0006810	transport	0.36	1	ENSBTAT00000021345
5	GO:0006974	cellular response to DNA damage stimulus	GO:0033554	cellular response to stress	0.36	1	ENSBTAT00000061421
5	GO:0090304	nucleic acid metabolic process	GO:0006139, GO:0043170	nucleobase-containing compound metabolic process, macromolecule metabolic process	0.39	2	ENSBTAT00000070366, ENSBTAT00000061421
5	GO:0043436	oxoacid metabolic process	GO:0006082	organic acid metabolic process	0.13	1	ENSBTAT00000086508
5	GO:0044267	cellular protein metabolic process	GO:0044260, GO:0019538	cellular macromolecule metabolic process, protein metabolic process	0.26	1	ENSBTAT00000075085
5	GO:0031326	regulation of cellular biosynthetic process	GO:0031323, GO:0009889, GO:0044249	regulation of cellular metabolic process, regulation of biosynthetic process, cellular biosynthetic process	0.43	1	ENSBTAT00000070366
5	GO:0051252	regulation of RNA metabolic process	GO:0060255, GO:0019219, GO:0016070	regulation of macromolecule metabolic process, regulation of nucleobase-containing compound metabolic process, RNA metabolic process	0.26	1	ENSBTAT00000070366
5	GO:0010468	regulation of gene expression	GO:0060255, GO:0010467	regulation of macromolecule metabolic process, gene expression	0.72	1	ENSBTAT00000070366
5	GO:0016482	cytosolic transport	GO:0046907	intracellular transport	1.32	2	ENSBTAT00000021345, ENSBTAT00000069904
5	GO:0090087	regulation of peptide transport	GO:0051049, GO:0015833	regulation of transport, peptide transport	0.22	1	ENSBTAT00000021345
5	GO:0002474	antigen processing and presentation of peptide antigen via MHC class I	GO:0048002	antigen processing and presentation of peptide antigen	0.6	1	ENSBTAT00000048998
5	GO:0009059	macromolecule biosynthetic process	GO:1901576, GO:0043170	organic substance biosynthetic process, macromolecule metabolic process	0.35	1	ENSBTAT00000070366
5	GO:0006508	proteolysis	GO:0019538	protein metabolic process	2.58	2	ENSBTAT00000071002, ENSBTAT00000075085
5	GO:1901605	alpha-amino acid metabolic process	GO:0006520	cellular amino acid metabolic process	0.22	1	ENSBTAT00000086508
5	GO:0044271	cellular nitrogen compound biosynthetic process	GO:0044249, GO:0034641	cellular biosynthetic process, cellular nitrogen compound metabolic process	0.54	2	ENSBTAT00000070366, ENSBTAT00000086508
5	GO:0007030	Golgi organization	GO:0006996, GO:0010256	organelle organization, endomembrane system organization	0.6	1	ENSBTAT00000021345
5	GO:0030163	protein catabolic process	GO:1901565, GO:0009057, GO:0019538	organonitrogen compound catabolic process, macromolecule catabolic process, protein metabolic process	0.13	1	ENSBTAT00000075085
5	GO:0019219	regulation of nucleobase-containing compound metabolic process	GO:0031323, GO:0006139, GO:0051171, GO:0080090	regulation of cellular metabolic process, nucleobase-containing compound metabolic process, regulation of nitrogen compound metabolic process, regulation of primary metabolic process	0.16	1	ENSBTAT00000070366
5	GO:1901566	organonitrogen compound biosynthetic process	GO:1901576, GO:1901564	organic substance biosynthetic process, organonitrogen compound metabolic process	0.13	1	ENSBTAT00000086508
5	GO:0016053	organic acid biosynthetic process	GO:1901576, GO:0044283, GO:0006082, GO:0044249	organic substance biosynthetic process, small molecule biosynthetic process, organic acid metabolic process, cellular biosynthetic process	0.22	1	ENSBTAT00000086508
5	GO:0065003	protein-containing complex assembly	GO:0043933, GO:0022607	protein-containing complex subunit organization, cellular component assembly	1	1	ENSBTAT00000073123
5	GO:0015031	protein transport	GO:0045184, GO:0015833	establishment of protein localization, peptide transport	0.35	1	ENSBTAT00000021345
5	GO:0016197	endosomal transport	GO:0046907, GO:0016192	intracellular transport, vesicle-mediated transport	0.72	1	ENSBTAT00000021345
5	GO:0008652	cellular amino acid biosynthetic process	GO:0006520, GO:0046394, GO:1901566	cellular amino acid metabolic process, carboxylic acid biosynthetic process, organonitrogen compound biosynthetic process	0.22	1	ENSBTAT00000086508
5	GO:0006811	ion transport	GO:0006810	transport	0.22	1	ENSBTAT00000021122
5	GO:0071702	organic substance transport	GO:0006810	transport	1.92	3	ENSBTAT00000083079, ENSBTAT00000021345, ENSBTAT00000048998
5	GO:0034613	cellular protein localization	GO:0008104, GO:0070727	protein localization, cellular macromolecule localization	0.71	1	ENSBTAT00000021345
5	GO:0044265	cellular macromolecule catabolic process	GO:0044260, GO:0009057, GO:0044248	cellular macromolecule metabolic process, macromolecule catabolic process, cellular catabolic process	0.22	1	ENSBTAT00000075085
5	GO:0034654	nucleobase-containing compound biosynthetic process	GO:0006139, GO:0019438, GO:1901362, GO:0044271, GO:0018130	nucleobase-containing compound metabolic process, aromatic compound biosynthetic process, organic cyclic compound biosynthetic process, cellular nitrogen compound biosynthetic process, heterocycle biosynthetic process	0.29	1	ENSBTAT00000070366
5	GO:0006886	intracellular protein transport	GO:0034613, GO:0015031, GO:0046907	cellular protein localization, protein transport, intracellular transport	0.58	1	ENSBTAT00000021345
5	GO:0009057	macromolecule catabolic process	GO:0043170, GO:1901575	macromolecule metabolic process, organic substance catabolic process	0.13	1	ENSBTAT00000075085
5	GO:0010556	regulation of macromolecule biosynthetic process	GO:0060255, GO:0009889, GO:0009059	regulation of macromolecule metabolic process, regulation of biosynthetic process, macromolecule biosynthetic process	0.43	1	ENSBTAT00000070366
5	GO:0032386	regulation of intracellular transport	GO:0046907, GO:0060341, GO:0051049	intracellular transport, regulation of cellular localization, regulation of transport	0.36	1	ENSBTAT00000021345
5	GO:0006796	phosphate-containing compound metabolic process	GO:0006793	phosphorus metabolic process	0.6	1	ENSBTAT00000013607
5	GO:0034453	microtubule anchoring	GO:0000226	microtubule cytoskeleton organization	1	1	ENSBTAT00000021345
5	GO:1903827	regulation of cellular protein localization	GO:0034613, GO:0060341, GO:0032880	cellular protein localization, regulation of cellular localization, regulation of protein localization	0.36	1	ENSBTAT00000021345
5	GO:0071705	nitrogen compound transport	GO:0006810	transport	0.79	2	ENSBTAT00000021345, ENSBTAT00000048998
6	GO:1901607	alpha-amino acid biosynthetic process	GO:1901605, GO:0008652	alpha-amino acid metabolic process, cellular amino acid biosynthetic process	0.36	1	ENSBTAT00000086508
6	GO:0033157	regulation of intracellular protein transport	GO:0032386, GO:0051223, GO:1903827, GO:0006886	regulation of intracellular transport, regulation of protein transport, regulation of cellular protein localization, intracellular protein transport	0.6	1	ENSBTAT00000021345
6	GO:0032527	protein exit from endoplasmic reticulum	GO:0006886	intracellular protein transport	0.6	1	ENSBTAT00000021345
6	GO:0070646	protein modification by small protein removal	GO:0006508, GO:0070647	proteolysis, protein modification by small protein conjugation or removal	0.6	1	ENSBTAT00000075085
6	GO:0006281	DNA repair	GO:0006974, GO:0006259	cellular response to DNA damage stimulus, DNA metabolic process	0.6	1	ENSBTAT00000061421
6	GO:0006820	anion transport	GO:0006811	ion transport	0.36	1	ENSBTAT00000021122
6	GO:0019752	carboxylic acid metabolic process	GO:0043436	oxoacid metabolic process	0.22	1	ENSBTAT00000086508
6	GO:0072666	establishment of protein localization to vacuole	GO:0072665, GO:0072594	protein localization to vacuole, establishment of protein localization to organelle	0.36	1	ENSBTAT00000021345
6	GO:2000112	regulation of cellular macromolecule biosynthetic process	GO:0010556, GO:0034645, GO:0031326	regulation of macromolecule biosynthetic process, cellular macromolecule biosynthetic process, regulation of cellular biosynthetic process	0.72	1	ENSBTAT00000070366
6	GO:0046394	carboxylic acid biosynthetic process	GO:0016053, GO:0019752	organic acid biosynthetic process, carboxylic acid metabolic process	0.36	1	ENSBTAT00000086508
6	GO:0090161	Golgi ribbon formation	GO:0007030	Golgi organization	1	1	ENSBTAT00000021345
6	GO:0006351	transcription, DNA-templated	GO:0010467, GO:0097659, GO:0034645	gene expression, nucleic acid-templated transcription, cellular macromolecule biosynthetic process	0.72	1	ENSBTAT00000070366
6	GO:0043604	amide biosynthetic process	GO:0044271, GO:0043603	cellular nitrogen compound biosynthetic process, cellular amide metabolic process	0.6	1	ENSBTAT00000086508
6	GO:0033365	protein localization to organelle	GO:0034613	cellular protein localization	0.82	1	ENSBTAT00000021345
6	GO:0019885	antigen processing and presentation of endogenous peptide antigen via MHC class I	GO:0002474, GO:0002483	antigen processing and presentation of peptide antigen via MHC class I, antigen processing and presentation of endogenous peptide antigen	1	1	ENSBTAT00000048998
6	GO:0006464	cellular protein modification process	GO:0036211, GO:0044267	protein modification process, cellular protein metabolic process	0.22	1	ENSBTAT00000075085
6	GO:0006605	protein targeting	GO:0006886	intracellular protein transport	0.36	1	ENSBTAT00000021345
6	GO:0032774	RNA biosynthetic process	GO:0016070, GO:0034654, GO:0009059	RNA metabolic process, nucleobase-containing compound biosynthetic process, macromolecule biosynthetic process	0.49	1	ENSBTAT00000070366
6	GO:0044257	cellular protein catabolic process	GO:0030163, GO:0044265, GO:0044267	protein catabolic process, cellular macromolecule catabolic process, cellular protein metabolic process	0.22	1	ENSBTAT00000075085
6	GO:0051223	regulation of protein transport	GO:0015031, GO:0070201, GO:0090087	protein transport, regulation of establishment of protein localization, regulation of peptide transport	0.36	1	ENSBTAT00000021345
6	GO:0042886	amide transport	GO:0071705	nitrogen compound transport	1.32	2	ENSBTAT00000021345, ENSBTAT00000048998
6	GO:0006355	regulation of transcription, DNA-templated	GO:1903506, GO:0006351, GO:0010468, GO:2000112	regulation of nucleic acid-templated transcription, transcription, DNA-templated, regulation of gene expression, regulation of cellular macromolecule biosynthetic process	1.2	1	ENSBTAT00000070366
6	GO:0042147	retrograde transport, endosome to Golgi	GO:0016197, GO:0016482	endosomal transport, cytosolic transport	1.2	1	ENSBTAT00000021345
6	GO:0048193	Golgi vesicle transport	GO:0016192	vesicle-mediated transport	1.56	2	ENSBTAT00000021345, ENSBTAT00000069904
6	GO:0043632	modification-dependent macromolecule catabolic process	GO:0044265	cellular macromolecule catabolic process	0.36	1	ENSBTAT00000075085
6	GO:0006528	asparagine metabolic process	GO:0009066, GO:0032787, GO:0043603	aspartate family amino acid metabolic process, monocarboxylic acid metabolic process, cellular amide metabolic process	0.6	1	ENSBTAT00000086508
6	GO:0015833	peptide transport	GO:0042886, GO:0071702	amide transport, organic substance transport	2.21	2	ENSBTAT00000021345, ENSBTAT00000048998
6	GO:0016070	RNA metabolic process	GO:0090304	nucleic acid metabolic process	0.29	1	ENSBTAT00000070366
6	GO:2001141	regulation of RNA biosynthetic process	GO:0051252, GO:0010556, GO:0032774, GO:0031326	regulation of RNA metabolic process, regulation of macromolecule biosynthetic process, RNA biosynthetic process, regulation of cellular biosynthetic process	0.43	1	ENSBTAT00000070366
6	GO:0007041	lysosomal transport	GO:0007034	vacuolar transport	0.6	1	ENSBTAT00000021345
6	GO:0016310	phosphorylation	GO:0006796	phosphate-containing compound metabolic process	1	1	ENSBTAT00000013607
6	GO:0006895	Golgi to endosome transport	GO:0006892, GO:0016482	post-Golgi vesicle-mediated transport, cytosolic transport	1	1	ENSBTAT00000069904
6	GO:0009066	aspartate family amino acid metabolic process	GO:1901605	alpha-amino acid metabolic process	0.36	1	ENSBTAT00000086508
6	GO:0051603	proteolysis involved in cellular protein catabolic process	GO:0044257, GO:0006508	cellular protein catabolic process, proteolysis	0.36	1	ENSBTAT00000075085
6	GO:0006623	protein targeting to vacuole	GO:0006605, GO:0007034, GO:0072666	protein targeting, vacuolar transport, establishment of protein localization to vacuole	0.6	1	ENSBTAT00000021345
7	GO:0072665	protein localization to vacuole	GO:0033365	protein localization to organelle	0.36	1	ENSBTAT00000021345
7	GO:0006622	protein targeting to lysosome	GO:0006623, GO:0061462, GO:0007041	protein targeting to vacuole, protein localization to lysosome, lysosomal transport	1	1	ENSBTAT00000021345
7	GO:0006366	transcription by RNA polymerase II	GO:0006351	transcription, DNA-templated	0.6	1	ENSBTAT00000070366
7	GO:0006298	mismatch repair	GO:0006281	DNA repair	1	1	ENSBTAT00000061421
7	GO:1903506	regulation of nucleic acid-templated transcription	GO:0097659, GO:2001141	nucleic acid-templated transcription, regulation of RNA biosynthetic process	0.72	1	ENSBTAT00000070366
7	GO:0006892	post-Golgi vesicle-mediated transport	GO:0048193	Golgi vesicle transport	0.6	1	ENSBTAT00000069904
7	GO:0009067	aspartate family amino acid biosynthetic process	GO:1901607, GO:0009066	alpha-amino acid biosynthetic process, aspartate family amino acid metabolic process	0.6	1	ENSBTAT00000086508
7	GO:0070647	protein modification by small protein conjugation or removal	GO:0006464	cellular protein modification process	0.36	1	ENSBTAT00000075085
7	GO:0070861	regulation of protein exit from endoplasmic reticulum	GO:0033157, GO:0032527	regulation of intracellular protein transport, protein exit from endoplasmic reticulum	1	1	ENSBTAT00000021345
7	GO:0006529	asparagine biosynthetic process	GO:0006528, GO:0072330, GO:0009067, GO:0043604	asparagine metabolic process, monocarboxylic acid biosynthetic process, aspartate family amino acid biosynthetic process, amide biosynthetic process	1	1	ENSBTAT00000086508
7	GO:0006354	DNA-templated transcription, elongation	GO:0032774, GO:0006351	RNA biosynthetic process, transcription, DNA-templated	0.6	1	ENSBTAT00000070366
7	GO:0072330	monocarboxylic acid biosynthetic process	GO:0032787, GO:0046394	monocarboxylic acid metabolic process, carboxylic acid biosynthetic process	0.6	1	ENSBTAT00000086508
7	GO:0006357	regulation of transcription by RNA polymerase II	GO:0006355, GO:0006366	regulation of transcription, DNA-templated, transcription by RNA polymerase II	1	1	ENSBTAT00000070366
7	GO:0034499	late endosome to Golgi transport	GO:0048193, GO:0042147	Golgi vesicle transport, retrograde transport, endosome to Golgi	1	1	ENSBTAT00000021345
7	GO:0032784	regulation of DNA-templated transcription, elongation	GO:0006354, GO:0006355	DNA-templated transcription, elongation, regulation of transcription, DNA-templated	1	1	ENSBTAT00000070366
7	GO:0032787	monocarboxylic acid metabolic process	GO:0019752	carboxylic acid metabolic process	0.36	1	ENSBTAT00000086508
7	GO:0015698	inorganic anion transport	GO:0006820	anion transport	0.6	1	ENSBTAT00000021122
7	GO:0019941	modification-dependent protein catabolic process	GO:0043632, GO:0051603	modification-dependent macromolecule catabolic process, proteolysis involved in cellular protein catabolic process	0.6	1	ENSBTAT00000075085
7	GO:0097659	nucleic acid-templated transcription	GO:0032774	RNA biosynthetic process	0.43	1	ENSBTAT00000070366
7	GO:0071955	recycling endosome to Golgi transport	GO:0048193, GO:0042147	Golgi vesicle transport, retrograde transport, endosome to Golgi	1	1	ENSBTAT00000021345
7	GO:0016579	protein deubiquitination	GO:0070646	protein modification by small protein removal	1	1	ENSBTAT00000075085
7	GO:0034067	protein localization to Golgi apparatus	GO:0033365	protein localization to organelle	1	1	ENSBTAT00000021345
8	GO:0006511	ubiquitin-dependent protein catabolic process	GO:0019941	modification-dependent protein catabolic process	1	1	ENSBTAT00000075085
8	GO:0061462	protein localization to lysosome	GO:0072665	protein localization to vacuole	0.6	1	ENSBTAT00000021345
8	GO:0006821	chloride transport	GO:0015698	inorganic anion transport	1	1	ENSBTAT00000021122

## Sheet: Table S6
Table S6. Differentially expressed transcripts targeted by the differentially expressed miRNAs
Differentially expressed miRNA	Differentially expressed transcript	Target region	Target description	miRand					PITA
				Tot Score	Tot Energy	Max Score	Max Energy	Positions	Energetic score
bta-miR-133a-3p	ENSBTAT00000021345	Coding region	GRIP and coiled-coil domain containing 2	147	-26.45	147	-26.45	4023	-14.5
bta-miR-133a-3p	ENSBTAT00000028059	Coding region	tripartite motif containing 8	141	-16.5	141	-16.5	609	-13.48
bta-miR-133a-3p	ENSBTAT00000033913	Coding region	centromere protein F	452	-67.94	155	-26.89	7549 7003 8016	-16.54
bta-miR-133a-3p	ENSBTAT00000070366	Coding region	SPT5 homolog, DSIF elongation factor subunit	141	-24.36	141	-24.36	1173	-12.44
bta-miR-133a-3p	ENSBTAT00000071002	Coding region	leukotriene A4 hydrolase	146	-24.64	146	-24.64	1128	-11.22
bta-miR-133a-3p	ENSBTAT00000072544	Coding region	stress induced phosphoprotein 1	140	-16.32	140	-16.32	356	-10.11
bta-miR-133a-3p	ENSBTAT00000072877	Coding region	family with sequence similarity 129 member C	140	-19.8	140	-19.8	725	-13.91
bta-miR-133a-3p	ENSBTAT00000074247	Coding region	zinc finger protein 532	142	-16.09	142	-16.09	764	-10.02
bta-miR-133a-3p	ENSBTAT00000075085	Coding region	ubiquitin specific peptidase 40	140	-22.54	140	-22.54	509	-11.18
bta-miR-133a-3p	ENSBTAT00000075709	3'UTR	major facilitator superfamily domain containing 13A	149	-27.68	149	-27.68	234	-11.41
bta-miR-133a-3p	ENSBTAT00000079143	Coding region	phosphatidylinositol glycan anchor biosynthesis class O	315	-49.84	165	-30.01	2279 666	-14.1
bta-miR-133a-3p	ENSBTAT00000083079	Coding region	oxysterol binding protein like 8	289	-33.6	145	-17.46	350 827	-12
bta-miR-206	ENSBTAT00000013607	Coding region	choline kinase alpha	141	-19.13	141	-19.13	1478	-13.32
bta-miR-206	ENSBTAT00000066733	Coding region	kinectin 1	144	-19.06	144	-19.06	684	-15.32
bta-miR-206	ENSBTAT00000076256	3'UTR	dynein axonemal assembly factor 4	140	-19.39	140	-19.39	259	-12.27
bta-miR-335-3p	ENSBTAT00000021345	Coding region	GRIP and coiled-coil domain containing 2	1820	-149.7	167	-21.2	968 1375 1177 1559 1468 3298 3169 148 2360 1972 2658 1955	-14.29
bta-miR-335-3p	ENSBTAT00000033913	Coding region	centromere protein F	3836	-288.31	171	-18.69	3106 1075 154 974 5065 5513 1510 2736 2576 3259 6766 7228 178 7312 7982 8244 1810 6504 6581 1428 6896 8948 5465 5697 5786 8732	-10.88
bta-miR-335-3p	ENSBTAT00000066733	Coding region	kinectin 1	1182	-102.85	155	-18.98	3071 1112 2343 3217 2836 3260 3592 637	-11.51
bta-miR-335-3p	ENSBTAT00000069271	Coding region	spermatid perinuclear RNA binding protein	300	-28.36	160	-16.96	1543 1386	-11.67
bta-miR-335-3p	ENSBTAT00000079799	Coding region	transcription activation suppressor family member 2	440	-44.65	156	-24.45	166 5691 1287	-11.9
bta-miR-335-3p	ENSBTAT00000083079	Coding region	oxysterol binding protein like 8	285	-34.09	145	-17.85	909 1009	-10.02

## Sheet: Table S7
Table S7. 90 transcripts targeted by differentially expressed miRNAs
miRNA	Differentially expressed transcript	Target region	miRand					PITA
			Tot Score	Tot Energy	Max Score	Max Energy	Positions	Energetic score
bta-miR-206	ENSBTAT00000001098	3'UTR	306	-39.85	160	-27.21	391 781	-20.68
bta-miR-206	ENSBTAT00000001617	3'UTR	179	-29.94	179	-29.94	709	-22.58
bta-miR-206	ENSBTAT00000002024	3'UTR	169	-29.53	169	-29.53	269	-20.35
bta-miR-206	ENSBTAT00000002028	3'UTR	160	-24.11	160	-24.11	1099	-20.21
bta-miR-206	ENSBTAT00000011952	3'UTR	179	-27.48	179	-27.48	2958	-20.1
bta-miR-206	ENSBTAT00000012833	3'UTR	289	-40.24	147	-20.88	2283 1241	-20.38
bta-miR-206	ENSBTAT00000017258	3'UTR	154	-22.05	154	-22.05	896	-28.43
bta-miR-206	ENSBTAT00000018911	3'UTR	290	-45.3	146	-27.16	2 2080	-23.29
bta-miR-206	ENSBTAT00000024028	3'UTR	152	-26.15	152	-26.15	855	-24.56
bta-miR-206	ENSBTAT00000027230	3'UTR	171	-30.26	171	-30.26	102	-24.69
bta-miR-206	ENSBTAT00000027379	3'UTR	154	-29.66	154	-29.66	104	-21.49
bta-miR-206	ENSBTAT00000043072	3'UTR	143	-20.61	143	-20.61	4076	-20.4
bta-miR-133a-3p	ENSBTAT00000043111	3'UTR	152	-29.01	152	-29.01	2512	-21.05
bta-miR-206	ENSBTAT00000043205	3'UTR	459	-63.83	167	-24.55	359 417 23	-20.67
bta-miR-133a-3p	ENSBTAT00000045037	3'UTR	146	-29.55	146	-29.55	1138	-22.96
bta-miR-133a-3p	ENSBTAT00000049235	3'UTR	144	-32.44	144	-32.44	751	-21.62
bta-miR-206	ENSBTAT00000066191	3'UTR	169	-29.53	169	-29.53	269	-20.35
bta-miR-206	ENSBTAT00000078768	3'UTR	177	-27.66	177	-27.66	32	-25.85
bta-miR-206	ENSBTAT00000020230	5'UTR	158	-28.99	158	-28.99	60	-20.06
bta-miR-206	ENSBTAT00000053481	5'UTR	173	-23.56	173	-23.56	795	-20.14
bta-miR-133a-3p	ENSBTAT00000061262	5'UTR	165	-29.34	165	-29.34	495	-20.76
bta-miR-206	ENSBTAT00000071825	5'UTR	144	-23.02	144	-23.02	182	-21.83
bta-miR-133a-3p	ENSBTAT00000000201	Coding region	311	-48.78	167	-25.83	1495 1573	-22.74
bta-miR-206	ENSBTAT00000000919	Coding region	152	-24.76	152	-24.76	398	-20.32
bta-miR-133a-3p	ENSBTAT00000008129	Coding region	292	-59.66	152	-37.66	60 436	-21.18
bta-miR-133a-3p	ENSBTAT00000008680	Coding region	304	-57.39	160	-34.71	2564 2160	-20.82
bta-miR-133a-3p	ENSBTAT00000009084	Coding region	152	-29.66	152	-29.66	1348	-20.32
bta-miR-133a-3p	ENSBTAT00000009771	Coding region	143	-34.77	143	-34.77	975	-20.31
bta-miR-133a-3p	ENSBTAT00000010151	Coding region	149	-24.14	149	-24.14	2208	-20.13
bta-miR-133a-3p	ENSBTAT00000012521	Coding region	146	-29.7	146	-29.7	67	-21.51
bta-miR-133a-3p	ENSBTAT00000015758	Coding region	302	-45.66	155	-28.03	2477 703	-23.5
bta-miR-206	ENSBTAT00000016887	Coding region	161	-25.41	161	-25.41	784	-20.08
bta-miR-206	ENSBTAT00000017473	Coding region	164	-26.89	164	-26.89	811	-20.3
bta-miR-133a-3p	ENSBTAT00000019601	Coding region	147	-27.96	147	-27.96	427	-20.82
bta-miR-133a-3p	ENSBTAT00000020040	Coding region	141	-34.27	141	-34.27	324	-23.28
bta-miR-133a-3p	ENSBTAT00000020624	Coding region	154	-25.28	154	-25.28	204	-21.97
bta-miR-133a-3p	ENSBTAT00000020700	Coding region	182	-32.03	182	-32.03	323	-25.39
bta-miR-206	ENSBTAT00000024328	Coding region	461	-62.95	163	-24.22	643 788 858	-21.85
bta-miR-206	ENSBTAT00000027346	Coding region	168	-23.9	168	-23.9	2821	-21.43
bta-miR-206	ENSBTAT00000027837	Coding region	146	-28.12	146	-28.12	674	-23.05
bta-miR-133a-3p	ENSBTAT00000028224	Coding region	447	-72.12	155	-27.4	2976 3009 1661	-20.26
bta-miR-133a-3p	ENSBTAT00000028226	Coding region	152	-32.34	152	-32.34	595	-21.96
bta-miR-133a-3p	ENSBTAT00000031949	Coding region	147	-24.05	147	-24.05	255	-22.56
bta-miR-133a-3p	ENSBTAT00000033340	Coding region	292	-50.24	147	-25.27	1797 321	-21.77
bta-miR-133a-3p	ENSBTAT00000035624	Coding region	144	-31.93	144	-31.93	1755	-20.22
bta-miR-133a-3p	ENSBTAT00000036539	Coding region	299	-46.02	152	-29.87	885 660	-20.38
bta-miR-133a-3p	ENSBTAT00000045089	Coding region	287	-47.42	145	-33.13	453 2538	-20.37
bta-miR-133a-3p	ENSBTAT00000046883	Coding region	152	-35.03	152	-35.03	536	-21.84
bta-miR-133a-3p	ENSBTAT00000048464	Coding region	156	-26.87	156	-26.87	715	-21.63
bta-miR-133a-3p	ENSBTAT00000061398	Coding region	460	-70.27	164	-34.57	7281 7458 3269	-20.55
bta-miR-133a-3p	ENSBTAT00000064640	Coding region	158	-26.11	158	-26.11	6	-20
bta-miR-133a-3p	ENSBTAT00000065138	Coding region	316	-66.59	169	-40.67	1014 428	-24.58
bta-miR-133a-3p	ENSBTAT00000067362	Coding region	147	-27.96	147	-27.96	427	-20.82
bta-miR-206	ENSBTAT00000067522	Coding region	168	-23.9	168	-23.9	2728	-21.43
bta-miR-133a-3p	ENSBTAT00000067537	Coding region	287	-47.42	145	-33.13	453 2472	-20.37
bta-miR-206	ENSBTAT00000067853	Coding region	151	-23.61	151	-23.61	2200	-22.48
bta-miR-133a-3p	ENSBTAT00000068464	Coding region	152	-35.03	152	-35.03	539	-21.84
bta-miR-206	ENSBTAT00000068708	Coding region	151	-23.61	151	-23.61	2200	-22.35
bta-miR-206	ENSBTAT00000069133	Coding region	151	-23.61	151	-23.61	1219	-22.56
bta-miR-133a-3p	ENSBTAT00000069276	Coding region	299	-46.02	152	-29.87	969 744	-20.38
bta-miR-206	ENSBTAT00000069587	Coding region	151	-23.61	151	-23.61	1747	-22.41
bta-miR-206	ENSBTAT00000070531	Coding region	328	-50.66	182	-27.56	1715 841	-20.89
bta-miR-206	ENSBTAT00000071039	Coding region	151	-23.61	151	-23.61	496	-22.55
bta-miR-206	ENSBTAT00000071204	Coding region	151	-27.87	151	-27.87	3687	-22.77
bta-miR-206	ENSBTAT00000071410	Coding region	151	-23.61	151	-23.61	2200	-22.55
bta-miR-206	ENSBTAT00000071558	Coding region	151	-23.61	151	-23.61	1219	-22.55
bta-miR-206	ENSBTAT00000076347	Coding region	152	-24.76	152	-24.76	308	-20.32
bta-miR-206	ENSBTAT00000076651	Coding region	151	-23.61	151	-23.61	1909	-22.35
bta-miR-206	ENSBTAT00000077526	Coding region	151	-23.61	151	-23.61	1909	-22.35
bta-miR-206	ENSBTAT00000077741	Coding region	151	-23.61	151	-23.61	2200	-20.57
bta-miR-206	ENSBTAT00000078899	Coding region	151	-24.78	151	-24.78	598	-21.27
bta-miR-133a-3p	ENSBTAT00000079197	Coding region	140	-29.98	140	-29.98	675	-22.64
bta-miR-206	ENSBTAT00000079434	Coding region	152	-24.76	152	-24.76	398	-20.32
bta-miR-133a-3p	ENSBTAT00000079900	Coding region	308	-50.03	161	-31.76	986 221	-22.55
bta-miR-133a-3p	ENSBTAT00000080064	Coding region	147	-24.05	147	-24.05	255	-22.56
bta-miR-206	ENSBTAT00000082252	Coding region	151	-23.61	151	-23.61	2200	-22.48
bta-miR-206	ENSBTAT00000082346	Coding region	151	-23.61	151	-23.61	2200	-22.56
bta-miR-206	ENSBTAT00000082500	Coding region	151	-23.61	151	-23.61	1909	-21.8
bta-miR-133a-3p	ENSBTAT00000082926	Coding region	311	-48.78	167	-25.83	1729 1807	-22.74
bta-miR-206	ENSBTAT00000083078	Coding region	151	-23.61	151	-23.61	2200	-22.34
bta-miR-206	ENSBTAT00000083530	Coding region	151	-23.61	151	-23.61	2200	-22.41
bta-miR-206	ENSBTAT00000083733	Coding region	151	-23.61	151	-23.61	1219	-22.25
bta-miR-206	ENSBTAT00000084033	Coding region	151	-23.61	151	-23.61	2200	-21.26
bta-miR-206	ENSBTAT00000084177	Coding region	151	-23.61	151	-23.61	2200	-22.79
bta-miR-206	ENSBTAT00000084349	Coding region	151	-23.61	151	-23.61	2200	-22.46
bta-miR-206	ENSBTAT00000084777	Coding region	151	-23.61	151	-23.61	2200	-22.46
bta-miR-206	ENSBTAT00000085067	Coding region	151	-23.61	151	-23.61	598	-22.35
bta-miR-206	ENSBTAT00000085316	Coding region	151	-23.61	151	-23.61	1450	-22.55
bta-miR-206	ENSBTAT00000085590	Coding region	151	-23.61	151	-23.61	2200	-22.52
bta-miR-206	ENSBTAT00000087468	Coding region	294	-37.93	151	-23.61	1909 236	-22.54
